# Supplementary material for: Gold(I) and Silver(I) Complexes Containing Hybrid Sulfonamide/Thiourea Ligands as Potential Leishmanicidal Agents
Source: MDPI journal article supplement (doi:10.3390/pharmaceutics16040452), 2024-03-25

# Gold(I) and Silver(I) Complexes Containing Hybrid Sulfonamide/Thiourea Ligands as Potential Leishmanicidal Agents

Alice P. Borges <sup>1</sup>, Malu M. S. Obata <sup>2</sup>, Silvia H. Libardi <sup>3</sup>, Rafael O. Trevisan <sup>2</sup>, Victor M. Deflon <sup>3</sup>, Ulrich Abram <sup>4</sup>, Francis B. Ferreira <sup>5</sup>, Luiz Antônio S. Costa <sup>6</sup>, Antonio O. T. Patrocínio <sup>7</sup>, Marcos V. da Silva <sup>2</sup>, Júlio C. Borges <sup>3</sup> and Pedro I. S. Maia <sup>1,\*</sup>

<sup>1</sup> Bioactive Compounds Development Research Group, Federal University of Triângulo Mineiro, Av. Dr. Randolfo Borges 1400, Uberaba 38025-440, MG, Brazil; aliceborges98@hotmail.com

<sup>2</sup> Department of Microbiology, Immunology and Parasitology, Federal University of Triângulo Mineiro, Av. Getúlio Guarita, Uberaba 38025-440, MG, Brazil; malu.mateus\_21@hotmail.com (M.M.S.O.); rafaelotrevisan@gmail.com (R.O.T.); marcos.silva@uftm.edu.br (M.V.d.S.)

<sup>3</sup> São Carlos Institute of Chemistry, University of São Paulo, Av. Trabalhador São Carlense, 400, São Carlos 13566-590, SP, Brazil; libardish@gmail.com (S.H.L.); deflon@iqsc.usp.br (V.M.D.); borgesjc@iqsc.usp.br (J.C.B.)

<sup>4</sup> Institute of Chemistry and Biochemistry, Freie Universität Berlin, Fabeckstr. 34/36, 14195 Berlin, Germany; ulrich.abram@fu-berlin.de

<sup>5</sup> Associated Faculties of Uberaba, Av. do Tutuna 720, Uberaba 38061-500, MG, Brazil; francisbferreira@gmail.com

<sup>6</sup> Computational Chemistry Research Group, Institute of Exact Sciences, Federal University of Juiz de Fora, Campus Universitário s/n Martelos, Juiz de Fora 36036-900, MG, Brazil; luiz.costa@ufjf.br

<sup>7</sup> Laboratory of Photochemistry and Material Science, Institute of Chemistry, Federal University of Uberlândia, Av. João Naves de Ávila 2121, Uberlândia 38400-902, MG, Brazil; otaviopatrocínio@ufu.br

\* Correspondence: pedro.maia@uftm.edu.br

# Table of Contents

## Part 1. IR spectroscopy .

1

**Figure S1.1:** IR (ATR) spectrum of HL3<sup>FPh</sup>;

**Figure S1.1:** IR (ATR) spectrum of HL4<sup>ClPh</sup>;

**Figure S1.2:** IR (ATR) spectrum of HL5<sup>NO<sub>2</sub>Ph</sup>;

**Figure S1.3:** IR (ATR) spectrum of HL6<sup>Al</sup>;

**Figure S1.5:** IR (ATR) spectrum of [Ag(HL3<sup>FPh</sup>)<sub>2</sub>]NO<sub>3</sub> (**Ag3**);

**Figure S1.6:** IR (ATR) spectrum of [Ag(HL4<sup>ClPh</sup>)<sub>2</sub>]NO<sub>3</sub> (**Ag4**);

**Figure S1.7:** IR (ATR) spectrum of [Ag(HL5<sup>NO<sub>2</sub>Ph</sup>)<sub>2</sub>]NO<sub>3</sub> (**Ag5**);

**Figure S1.8:** IR (ATR) spectrum of [Ag(HL6<sup>Al</sup>)<sub>2</sub>]NO<sub>3</sub> (**Ag6**);

**Figure S1.9:** IR (ATR) spectrum of [Au(HL1<sup>Ch</sup>)<sub>2</sub>]Cl (**Au1**);

**Figure S1.10:** IR (ATR) spectrum of [Au(HL2<sup>Ph</sup>)<sub>2</sub>]Cl (**Au2**);

**Figure S1.11:** IR (ATR) spectrum of [Au(HL3<sup>FPh</sup>)<sub>2</sub>]Cl (**Au3**);

**Figure S1.12:** IR (ATR) spectrum of [Au(HL4<sup>ClPh</sup>)<sub>2</sub>]Cl (**Au4**);

**Figure S1.13:** IR (ATR) spectrum of [Au(HL5<sup>NO<sub>2</sub>Ph</sup>)<sub>2</sub>]Cl (**Au5**);

**Figure S1.14:** IR (ATR) spectrum of [Au(HL6<sup>Al</sup>)<sub>2</sub>]Cl (**Au6**);

**Table S1:** Selected absorption bands in the infrared region for free ligands and complexes;

## Part 2. NMR spectroscopy .

9

**Figure S2.1:** <sup>1</sup>H NMR spectrum of HL3<sup>FPh</sup> in DMSO-*d*<sub>6</sub>;

**Figure S2.2:** <sup>1</sup>H NMR spectrum of HL4<sup>ClPh</sup> in DMSO-*d*<sub>6</sub>;

**Figure S2.3:** <sup>1</sup>H NMR spectrum of HL5<sup>NO<sub>2</sub>Ph</sup> in DMSO-*d*<sub>6</sub>;

**Figure S2.4:** <sup>1</sup>H NMR spectrum of HL6<sup>Al</sup> in DMSO-*d*<sub>6</sub>;

**Figure S2.5:** <sup>19</sup>F NMR spectrum (377 MHz) of HL3<sup>FPh</sup> in DMSO-*d*<sub>6</sub>;

**Figure S2.6:** <sup>1</sup>H NMR spectrum of [Ag(HL3<sup>FPh</sup>)<sub>2</sub>]NO<sub>3</sub> (**Ag3**) in DMSO-*d*<sub>6</sub>;

**Figure S2.7:** <sup>1</sup>H NMR spectrum of [Ag(HL4<sup>ClPh</sup>)<sub>2</sub>]NO<sub>3</sub> (**Ag4**) in DMSO-*d*<sub>6</sub>;

**Figure S2.8:** <sup>1</sup>H NMR spectrum of [Ag(HL5<sup>NO<sub>2</sub>Ph</sup>)<sub>2</sub>]NO<sub>3</sub> (**Ag5**) in DMSO-*d*<sub>6</sub>;

**Figure S2.9:** <sup>1</sup>H NMR spectrum of [Ag(HL6<sup>Al</sup>)<sub>2</sub>]NO<sub>3</sub> (**Ag6**) in DMSO-*d*<sub>6</sub>;

**Figure S2.10:** <sup>1</sup>H NMR spectrum of [Au(HL1<sup>Ch</sup>)<sub>2</sub>]Cl (**Au1**) in DMSO-*d*<sub>6</sub>;

**Figure S2.11:** <sup>1</sup>H NMR spectrum of [Au(HL2<sup>Ph</sup>)<sub>2</sub>]Cl (**Au2**) in DMSO-*d*<sub>6</sub>;

**Figure S2.12:** <sup>1</sup>H NMR spectrum of [Au(HL3<sup>FPh</sup>)<sub>2</sub>]Cl (**Au3**) in DMSO-*d*<sub>6</sub>;

**Figure S2.13:** <sup>1</sup>H NMR spectrum of [Au(HL4<sup>ClPh</sup>)<sub>2</sub>]Cl (**Au4**) in DMSO-*d*<sub>6</sub>;

**Figure S2.14:** <sup>1</sup>H NMR spectrum of [Au(HL5<sup>NO<sub>2</sub>Ph</sup>)<sub>2</sub>]Cl (**Au5**) in DMSO-*d*<sub>6</sub>;

**Figure S2.15:** <sup>1</sup>H NMR spectrum of [Au(HL6<sup>Al</sup>)<sub>2</sub>]Cl (**Au6**) in DMSO-*d*<sub>6</sub>;

**Figure S2.16:** <sup>19</sup>F NMR spectrum (377 MHz) of [Ag(HL3<sup>FPh</sup>)<sub>2</sub>]NO<sub>3</sub> (**Ag3**) in DMSO-*d*<sub>6</sub>;

**Figure S2.17:** <sup>19</sup>F NMR spectrum (377 MHz) of [Au(HL3<sup>FPh</sup>)<sub>2</sub>]Cl (**Au3**) in DMSO-*d*<sub>6</sub>;

## Part 3. ESI+ MS spectra .

18

**Figure S3.1:** ESI(+) MS spectrum of [Ag(HL3<sup>FPh</sup>)<sub>2</sub>]NO<sub>3</sub> (**Ag3**);

**Figure S3.2:** ESI(+) MS spectrum of [Au(HL1<sup>Ch</sup>)<sub>2</sub>]Cl (**Au1**);

**Figure S3.4:** ESI(+) MS spectrum of [Au(HL2<sup>Ph</sup>)<sub>2</sub>]Cl (**Au2**);

**Figure S3.5:** ESI(+) MS spectrum of [Au(HL3<sup>FPh</sup>)<sub>2</sub>]Cl (**Au3**);

**Figure S3.6:** ESI(+) MS spectrum of [Au(HL4<sup>ClPh</sup>)<sub>2</sub>]Cl (**Au4**);

**Figure S3.7:** ESI(+) MS spectrum of [Au(HL6<sup>Al</sup>)<sub>2</sub>]Cl (**Au6**);

## Part 4. Crystallographic data.

24

**Figure S4.1:** Hydrogen bonds involved in the crystalline structure of the HL3<sup>FPh</sup> ligand. Intermolecular hydrogen bonds: [N(1)···O(1) = 2.910(3) Å, N(1)-H(1)···O(1) = 115.4°], [N(2)···S(1) = 3.311(2) Å, N(2)-H(2)···S(1) = 160.8°], [N(1)···O(2) = 3.420(3) Å, N(1)-H(1)···O(2) =

98.1°, [N(3)···O(2) = 2.959(2) Å, N(3)-H(3)···O(2) = 147.7°]. Intramolecular hydrogen bonding: [N(3)···N(1) = 2.659(3) Å, N(3)-H(3)···N(1) = 110.3°]. Used symmetry operations (') x-1, y, z, (') -x, -y+1, -z+1 and (') -x, -y+2, -z+1. Red dotted lines (between donor and acceptor atoms) represent hydrogen bonds;

**Figure S4.2:** Hydrogen bonds involved in the crystalline structure of the **HL5<sup>NO2Ph</sup>** ligand. Intermolecular hydrogen bonds: [N(1)···O(1') = 2.887(4) Å, N(1)-H(1)···O(1') = 117.4°], [N(2)···S(1'') = 3.347(3) Å, N(2)-H(2)···S(1'') = 165.2°], [N(3)···O(2''') = 3.040(4) Å, N(3)-H(3)···O(2''') = 151.8°]. Used symmetry operations (') x-1, y, z, (') -x, -y+1, -z+1 and (') -x, -y, -z+1. Blue dotted lines (between donor and acceptor atoms) represent;

**Figure S4.8:** Hydrogen bonds involved in the crystalline structure of the **HL6<sup>Al</sup>** ligand. Intermolecular hydrogen bonds: [N(3)···O(2) = 3.024(3) Å, N(3)-H(3)···O(2) = 129.0°], [N(2)···S(1) = 3.3475(18) Å, N(2)-H(2)···S(1) = 159.0°], [N(1)···S(1) = 3.356(2) Å, N(1)-H(1)···S(1) = 118.4°]. Used symmetry operations (') -x, -y, -z+1, (') -x+1, -y+1, -z+1 and (') x-1, y, z. Blue dotted lines (between donor and acceptor atoms) represent hydrogen bonds;

**Figure S4.4** Ellipsoid representation of [Au(HL1<sup>Ch</sup>)<sub>2</sub>]Cl·CH<sub>3</sub>OH (**Au1**·CH<sub>3</sub>OH). The hydrogen atoms have been omitted for clarity. A solvent mask was calculated and 108 electrons were found in a volume of 518 Å<sup>3</sup> in 1 void per unit cell. This is consistent with the presence of 0.5[CH<sub>2</sub>Cl<sub>2</sub>;2H<sub>2</sub>O] per Asymmetric Unit which account for 120 electrons per unit cell.

**Figure S4.5** Ellipsoid representation of [Au(HL2<sup>Ph</sup>)<sub>2</sub>]Cl·CH<sub>3</sub>OH (**Au2**·CH<sub>3</sub>OH). The hydrogen atoms have been omitted for clarity.

**Figure S4.6:** Hydrogen bonds involved in the crystalline structure of the **Au2** complex. Intermolecular hydrogen bonds: [N(1)···Cl(1) = 3.173(4) Å, N(1)-H(1)···Cl(1) = 113.8°], [O(1S)···Cl(1) = 3.135(5) Å, O(1S)-H(1S)···Cl(1) = 152.4°], [N(3A)···O(1) = 2.775(14) Å, N(3A)-H(3A)···O(1) = 146.1°], [N(3B)···O(1) = 3.149(14) Å, N(3B)-H(3B)···O(1) = 136.9°]. Intramolecular hydrogen bonding: [N(2)···O(1S) = 2.905(5) Å, N(2)-H(2)···O(1S) = 135.6°]. Used symmetry operations (') -x, +y, -z. Blue dotted lines (between donor and acceptor atoms) represent hydrogen bonds;

## Part 5. Photophysical studies

27

**Figure S5.1:** Electronic spectra of **Ag3** (green line), **Ag4** (orange line), **Ag5** (red line) and **Ag6** (purple line) in the 210 to 350 nm range (10<sup>-6</sup> M CH<sub>3</sub>CN solution);

**Figure S5.2:** Electronic spectra of **Au1** (blue line), **Au2** (pink line), **Au3** (green line), **Au4** (orange line), **Au5** (red line) and **Au6** (purple line) in the 210 to 350 nm range (10<sup>-6</sup> M CH<sub>3</sub>OH solution for **Au1**, **Au2**, **Au3**, **Au6** and 10<sup>-6</sup> M solution CH<sub>3</sub>CN for **Au4** and **Au5**);

**Figure S5.9:** Linear regression for **Ag3** (green line), **Ag4** (orange line), **Ag5** (red line) and **Ag6** (purple line);

**Table S2:** Electronic spectra data obtained for the **Ag3** and **Ag4** complexes;

**Table S3:** Electronic spectra data obtained for the **Ag5** and **Ag6** complexes;

**Figure S5.10:** Linear regression for **Au1** (blue line), **Au2** (pink line), **Au3** (green line), **Au4** (orange line), **Au5** (red line) and **Au6** (purple line);

**Table S4:** Electronic spectra data obtained for the **Au1** and **Au2** complexes;

**Table S5:** Electronic spectra data obtained for the **Au3** and **Au4** complexes;

**Table S6:** Electronic spectra data obtained for the **Au5** and **Au6** complexes;

**Figure S5.5:** (a) Emission spectra of **Au1** (blue line) and **Au2** (pink line) in CH<sub>3</sub>OH at 298 K; λ<sub>exc</sub> = 255 nm for **Au1** and 270 nm for **Au2**; (b) Emission spectra of CH<sub>3</sub>OH at 298 K; λ<sub>exc</sub> = 250 nm;

**Figure S5.6:** Emission spectra of **Au1** (blue dashed line) and **Au2** (pink dashed line) in MeOH at 77 K; λ<sub>exc</sub> = 255 nm for **Au1** and 270 nm for **Au2**;

## Part 6. DFT studies

32

**Table S7.** Basis set functions scheme used for the gold complexes.

**Table S8:** Vibrational modes and their theoretical assignments related to the C=S bond;

**Figure S6.1:** Optimized structures of the silver complexes;

**Table S9:** Main theoretical structural data of the silver complexes;

**Figure S6.2:** Optimized structures of the gold complexes;

**Table S10:** Main theoretical structural data of the gold complexes;

**Figure S6.3:** HOMO and LUMO orbitals in the silver complexes;

**Figure S6.4 -** HOMO and LUMO orbitals in the gold complexes;

**Figure S6.5:** Optimized structure of  $[\text{Au}(\text{HL3}^{\text{FPh}})_2]^+$  (**Au3**) with the charges obtained for the AIM data;

**Table S11:** Electronic properties of the gold(I) complexes. The values are shown, respectively, for each bond in the order they appear;

## Part 7. Biological studies

41

**Figure S7.1:** Graph of the viability versus concentrations ( $\mu\text{M}$ ) of the compounds;

**Figure S7.2:** Leishmanicidal activity against to the *Leishmania infantum* parasite by concentrations of the compound. Blue curve represents the reference leishmanicidal drug, Glucantime. Black curve represents each compound;

**Figure S7.3:** Leishmanicidal activity against to the *Leishmania braziliensis* parasite by concentrations of the compound. Blue curve represents the reference leishmanicidal drug, Glucantime. Black curve represents each compound;

**Figure S7.4:** (a) percentage of the number of infected in 200 macrophages by *Leishmania infantum*; (b) percentage of leishmaniasis that infect 100 cells/macrophages; (c) average percentage of leishmaniasis that infect 200 cells/macrophages; of the selected compounds;

**Figure S7.5:** Image captured under a fluorescence microscope (EVOS) of Raw macrophages infected by *Leishmania infantum* after treatment with a Glucantime (leishmanicidal drug) (A) and the selected compounds;

**Figure S7.6:** (A) Fluorescence emission spectra ( $\lambda_{\text{ex}} = 295 \text{ nm}$ ) of LbOYE protein in the concentration of  $1 \mu\text{mol L}^{-1}$  in the presence of increasing concentrations of the  $\text{HL1}^{\text{Ch}}$  compound. (B) Variation of maximum fluorescence intensities ( $\lambda_{\text{max}} = 333 \text{ nm}$ ) and non-linear fit to the Hill equation (Equation 1). (C) Logarithmic relationship to obtain the number of bonding sites according to Equation 2. (D) Relationship of temperatures of 25 and 37 °C. The spectra were obtained in Tris-HCl buffer, pH 8.0; 100  $\text{mmol L}^{-1}$  of NaCl and 2.5 % of DMSO;

**Figure S7.7:** (A) Fluorescence emission spectra ( $\lambda_{\text{ex}} = 295 \text{ nm}$ ) of LbOYE protein in the concentration of  $1 \mu\text{mol L}^{-1}$  in the presence of increasing concentrations of the  $\text{HL3}^{\text{FPh}}$  compound. (B) Variation of maximum fluorescence intensities ( $\lambda_{\text{max}} = 333 \text{ nm}$ ) and non-linear fit to the Hill equation (Equation 1). (C) Logarithmic relationship to obtain the number of bonding sites according to Equation 2. (D) Relationship of temperatures of 25 and 37 °C. The spectra were obtained in Tris-HCl buffer, pH 8.0; 100  $\text{mmol L}^{-1}$  of NaCl and 2.5 % of DMSO.

**Figure S7.8.** Fluorescence emission spectra ( $\lambda_{\text{ex}} = 295 \text{ nm}$ ) of LbOYE protein in the concentration of  $1 \mu\text{mol L}^{-1}$  in the presence of increasing concentrations of the  $[\text{Au}(\text{HL1}^{\text{Ch}})_2]\text{Cl}$  (**Au1**) complex. (B) Variation of maximum fluorescence intensities ( $\lambda_{\text{max}} = 333 \text{ nm}$ ) and non-linear fit to the Hill equation (Equation 1). (C) Logarithmic relationship to obtain the number of bonding sites according to Equation 2. (D) Comparison between the temperatures of 25 °C and 37 °C. The spectra were obtained in Tris-HCl buffer, pH 8.0; 100  $\text{mmol L}^{-1}$  of NaCl and 2.5 % of DMSO.

## Part 8. Docking interactions

50

**Figure S8.1:** Representative figure of the  $\text{HL1}^{\text{Ch}}$  ligand at the site of the LbOYE;

**Figure S8.2:** Representative figure of the  $\text{HL3}^{\text{FPh}}$  ligand at the site of the LbOYE;



**Figure S8.11:** Representative figure of the  $\text{HL4}^{\text{CIPh}}$  ligand at the site of the LbOYE;  
**Figure S8.12:** Representative figure of the  $\text{HL5}^{\text{NO2Ph}}$  ligand at the site of the LbOYE;  
**Figure S8.13:** Representative figure of the  $\text{HL6}^{\text{Al}}$  ligand at the site of the LbOYE;  
**Figure S8.14:** Representative figure of the  $[\text{Ag}(\text{HL1}^{\text{Ch}})_2]\text{NO}_3$  complex at the site of the LbOYE;  
**Figure S8.15:** Representative figure of the  $[\text{Ag}(\text{HL2}^{\text{Ph}})_2]\text{NO}_3$  complex at the site of LbOYE;  
**Figure S8.16:** Representative figure of the  $[\text{Ag}(\text{HL3}^{\text{FPh}})_2]\text{NO}_3$  complex at the site of the LbOYE;  
**Figure S8.17:** Representative figure of the  $[\text{Ag}(\text{HL4}^{\text{CIPh}})_2]\text{NO}_3$  complex at the site of the LbOYE; **Figure S8.18:** Representative figure of the  $[\text{Ag}(\text{HL5}^{\text{NO2Ph}})_2]\text{NO}_3$  complex at the site of the LbOYE;  
**Figure S8.19:** Representative figure of the  $[\text{Au}(\text{HL1}^{\text{Ch}})_2]\text{Cl}$  complex at the site of the LbOYE;  
**Figure S8.20:** Representative figure of the  $[\text{Au}(\text{HL2}^{\text{Ph}})_2]\text{Cl}$  complex at the site of the LbOYE;  
**Figure S8.21:** Representative figure of the  $[\text{Au}(\text{HL3}^{\text{FPh}})_2]\text{Cl}$  complex at the site of the LbOYE;  
**Figure S8.22:** Representative figure of the  $[\text{Au}(\text{HL4}^{\text{CIPh}})_2]\text{Cl}$  complex at the site of the LbOYE;  
**Figure S8.23:** Representative figure of the  $[\text{Au}(\text{HL5}^{\text{NO2Ph}})_2]\text{Cl}$  complex at the site of the LbOYE.

**Figure S1.1** - IR (ATR) spectrum of HL3<sup>FPh</sup>.

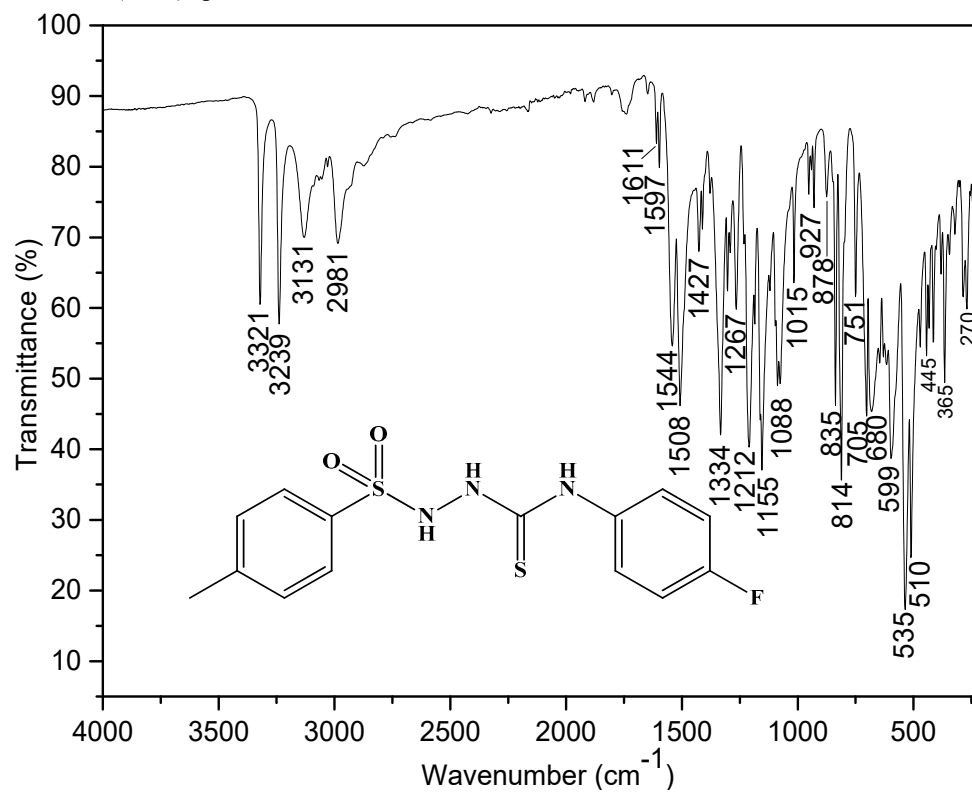

**Figure S1.24** – IR (ATR) spectrum of HL4<sup>ClPh</sup>.

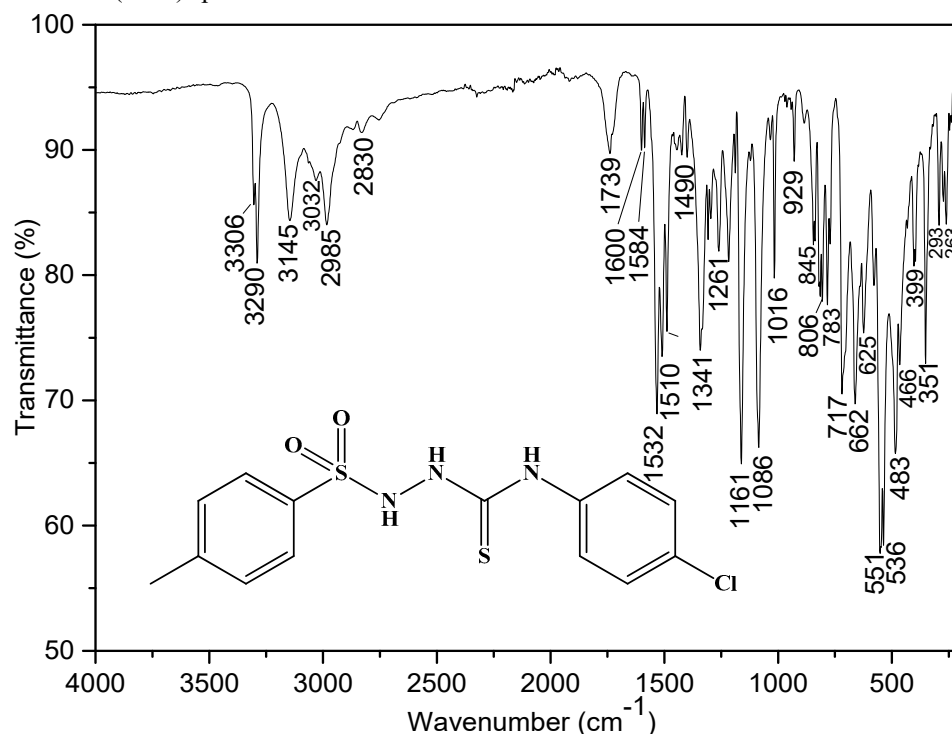

Figure S1.25 - IR (ATR) spectrum of HL5<sup>NO<sub>2</sub>Ph</sup>.

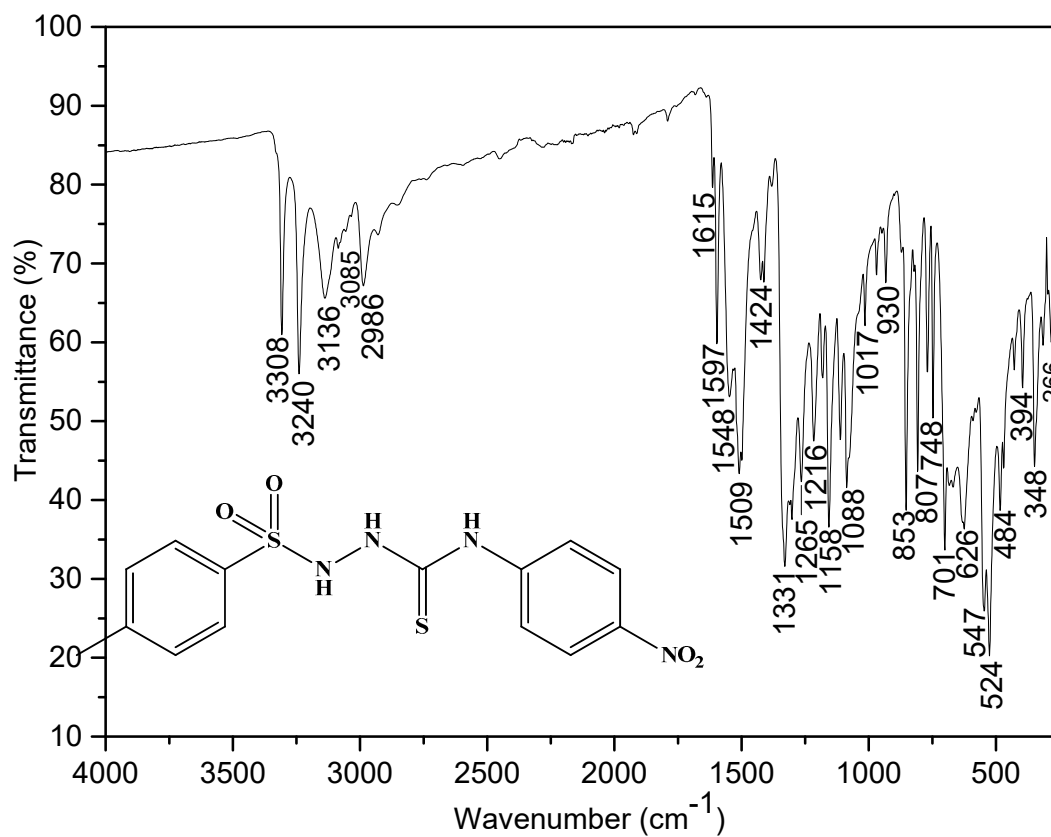

Figure S1.26 - IR (ATR) spectrum of HL6<sup>Al</sup>.

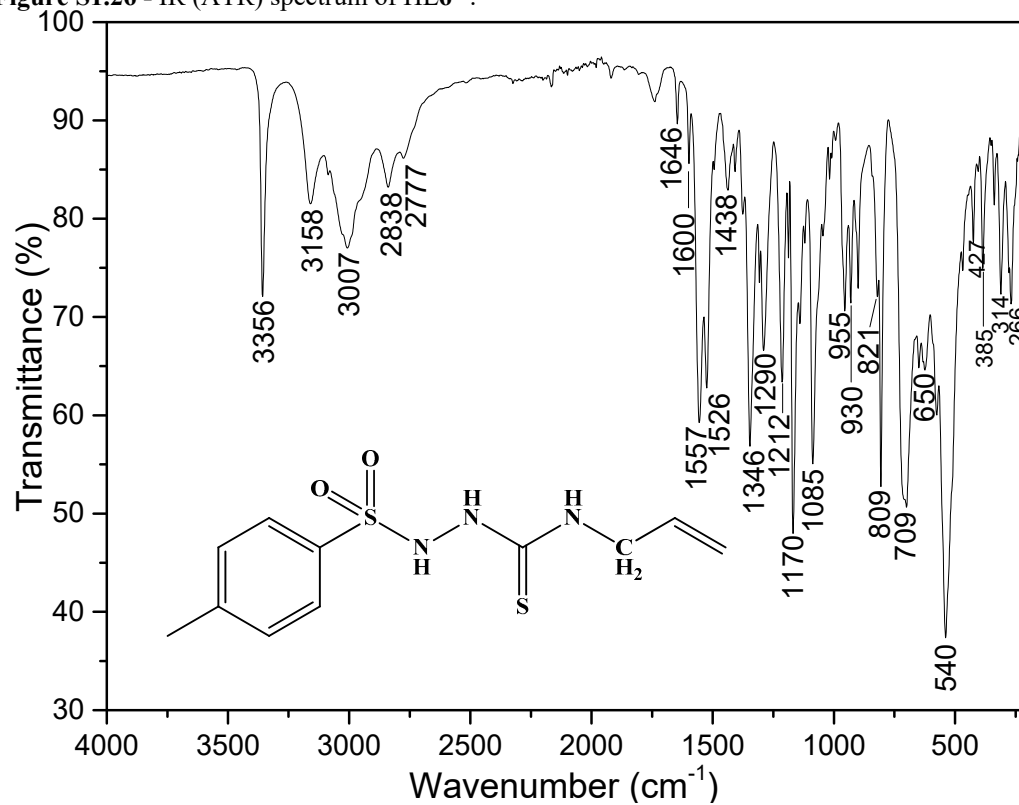

**Figure S1.5** - IR (ATR) spectrum of  $[\text{Ag}(\text{HL3}^{\text{FPh}})_2]\text{NO}_3$  (**Ag3**).

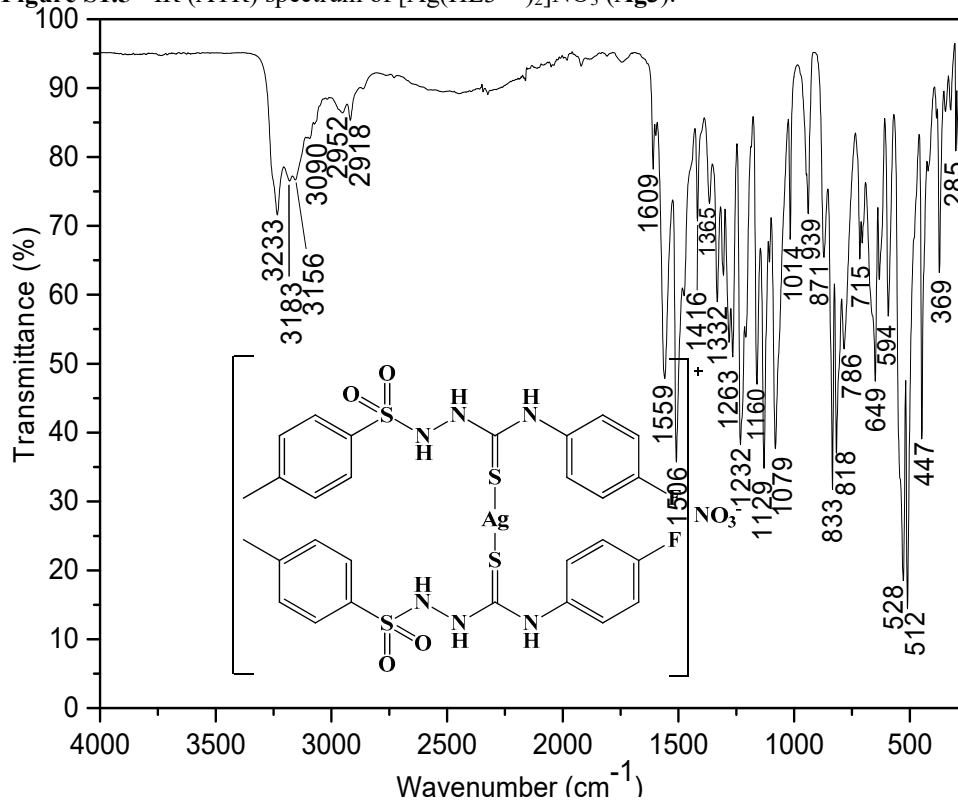

**Figure S1.6** - IR (ATR) spectrum of  $[\text{Ag}(\text{HL4}^{\text{ClPh}})_2]\text{NO}_3$  (**Ag4**).

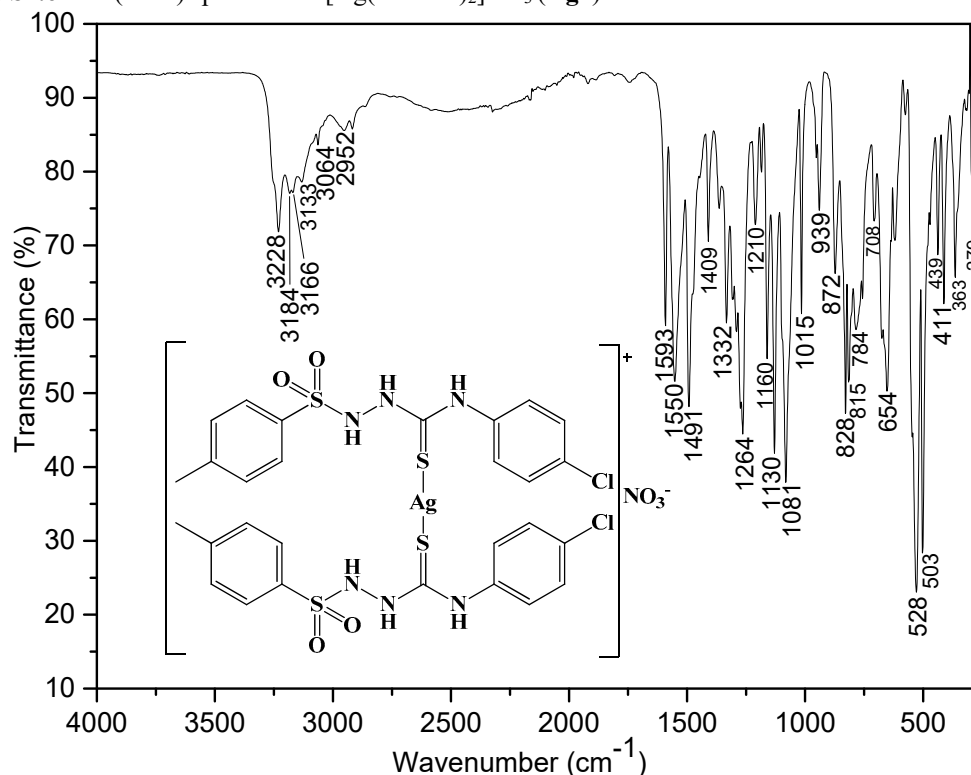

**Figure S1.7** - IR (ATR) spectrum of  $[\text{Ag}(\text{HL5}^{\text{NO}_2\text{Ph}})_2]\text{NO}_3$  (**Ag5**).

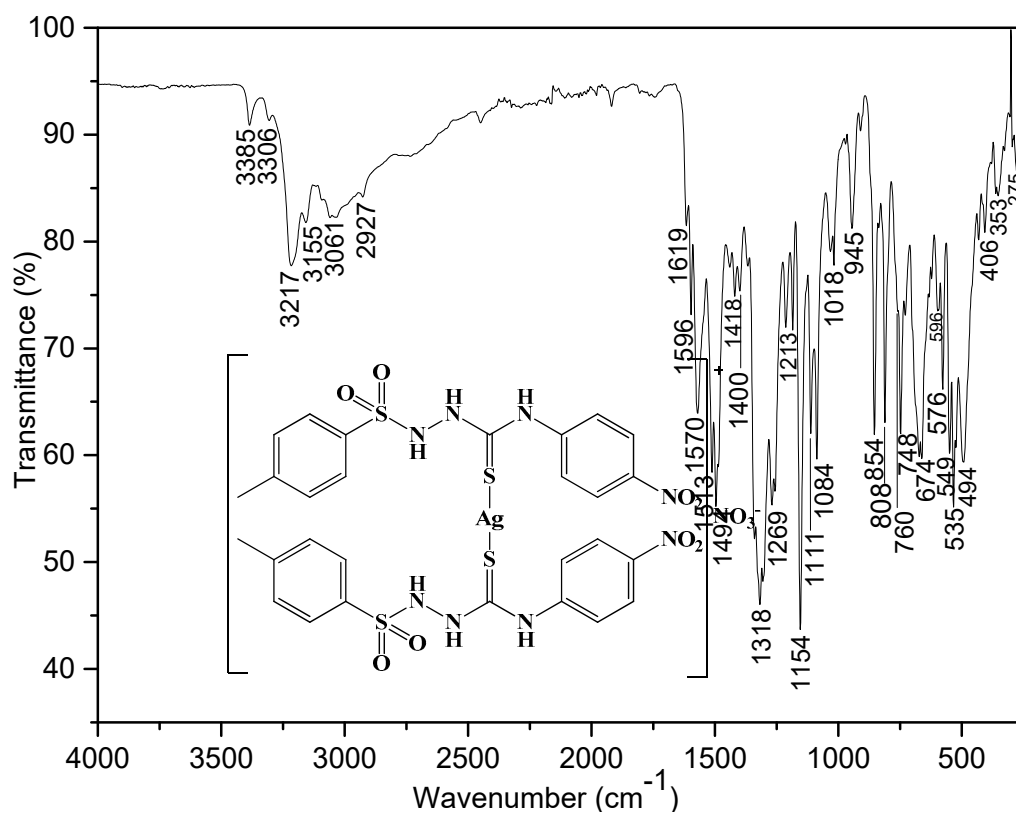

**Figure S1.8** - IR (ATR) spectrum of  $[Ag(HL6^{Al})_2]NO_3$  (**Ag6**).

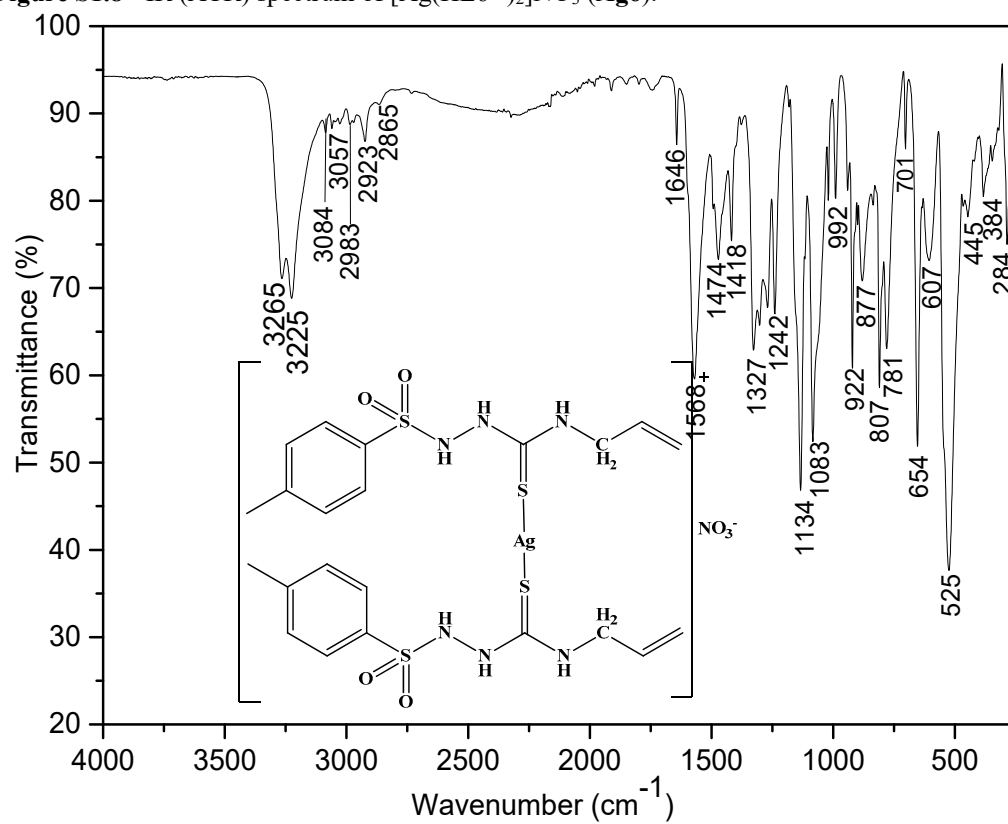

**Figure S1.9** – IR (ATR) spectrum of  $[\text{Au}(\text{HL1}^{\text{Ch}})_2]\text{Cl}$  (**Au1**).

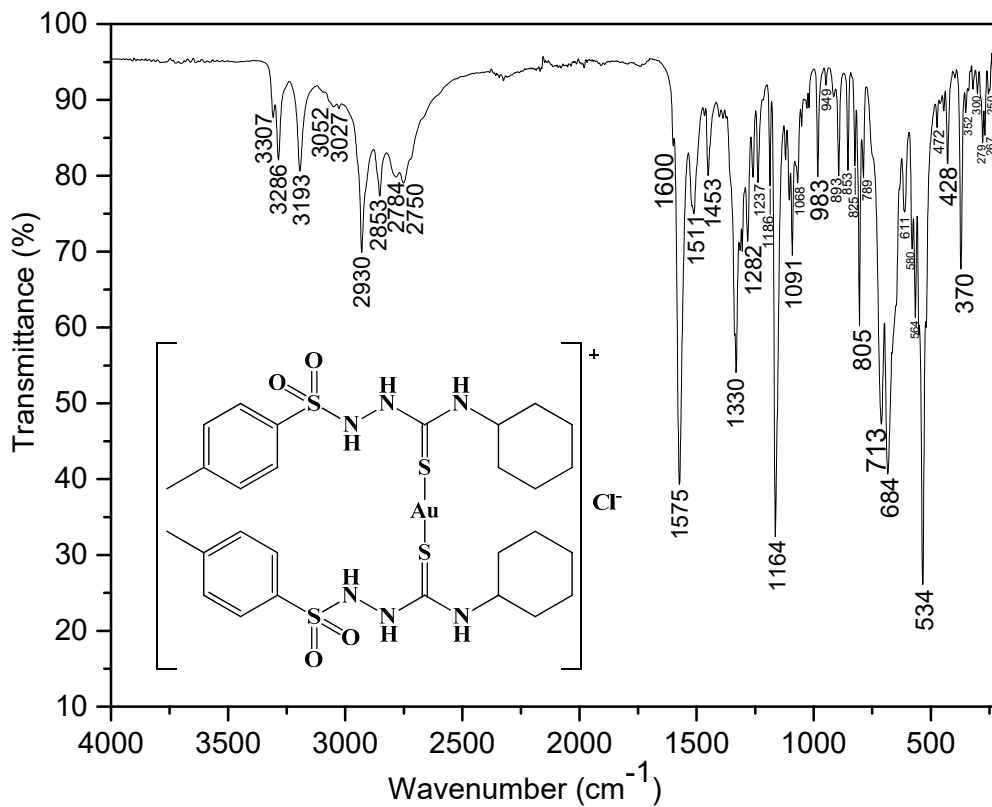

**Figure S1.10** – IR (ATR) spectrum of  $[\text{Au}(\text{HL2}^{\text{Ph}})_2]\text{Cl}$  (**Au2**).

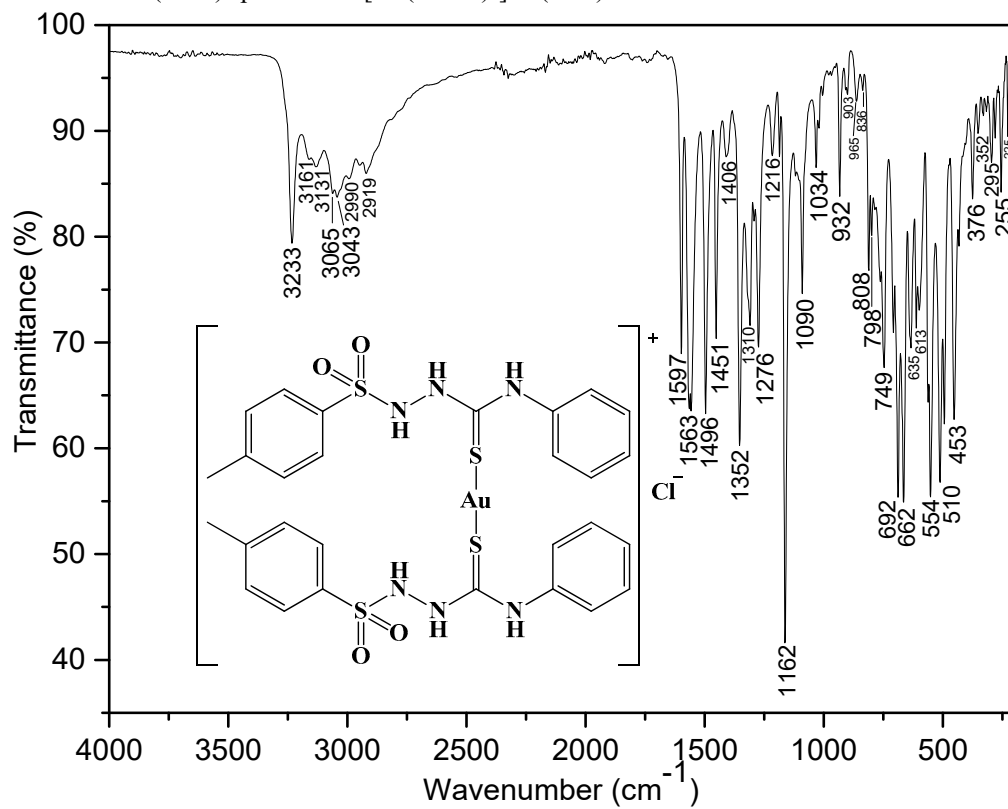

**Figure S1.11** – IR (ATR) spectrum of  $[\text{Au}(\text{HL}3^{\text{FPh}})_2]\text{Cl}$  (**Au3**).

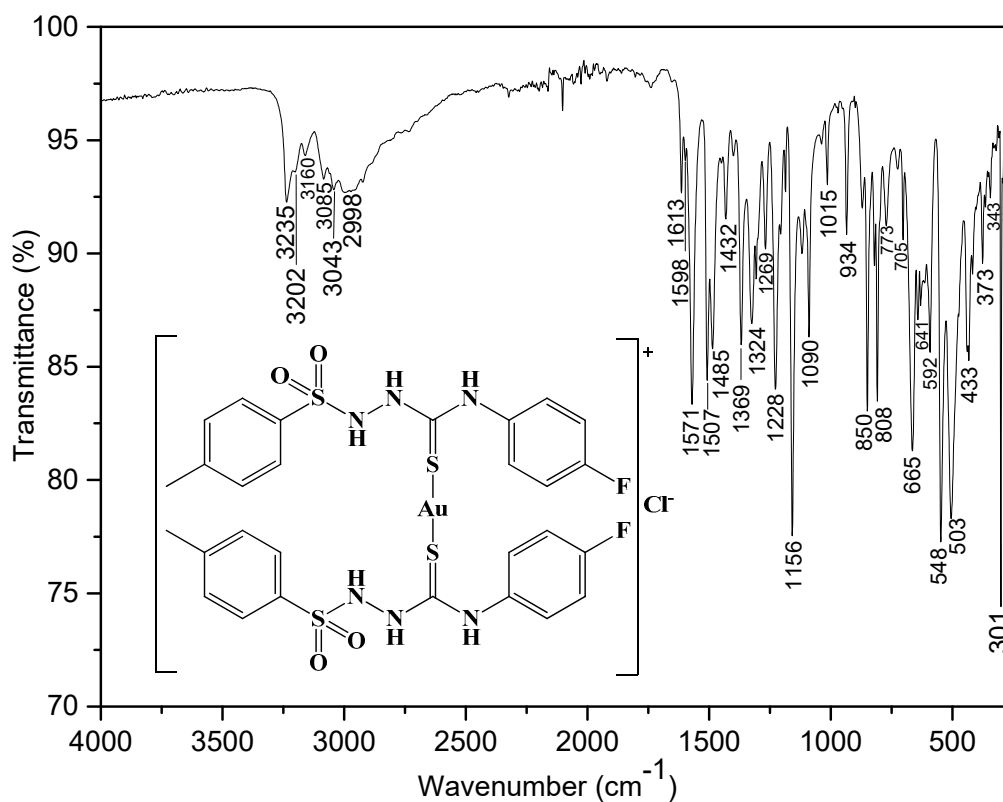

**Figure S1.12** – IR (ATR) spectrum of  $[\text{Au}(\text{HL}4^{\text{ClPh}})_2]\text{Cl}$  (**Au4**).

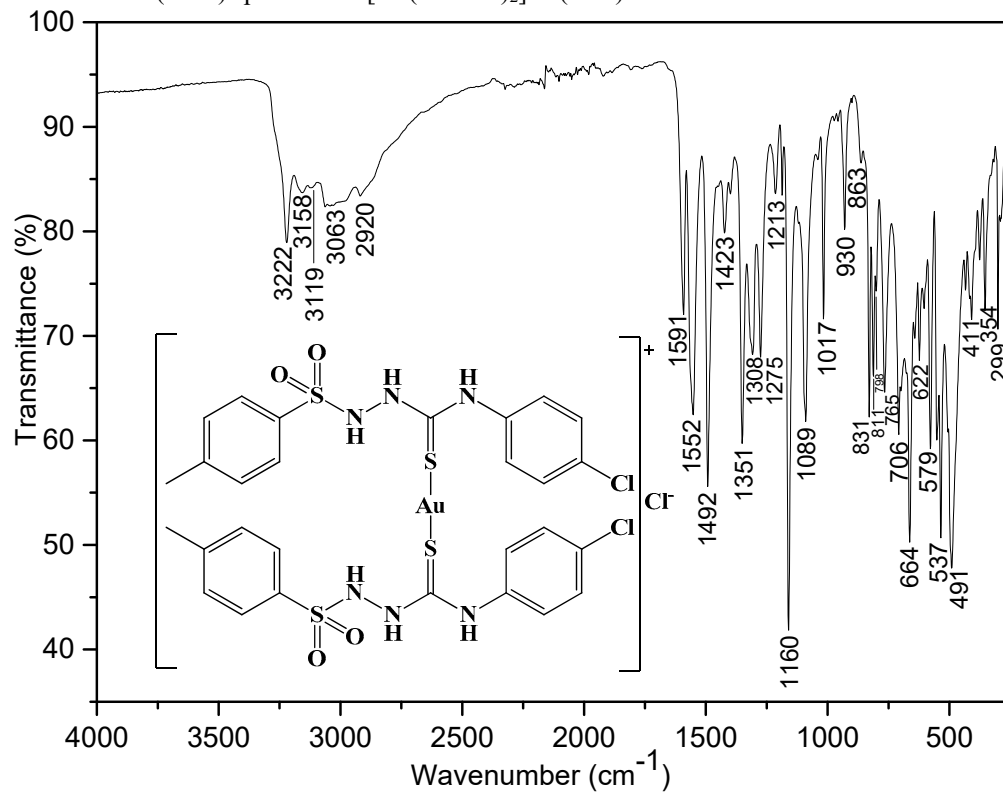

**Figure S1.13** – IR (ATR) spectrum of  $[\text{Au}(\text{HL}5^{\text{NO}_2\text{Ph}})_2]\text{Cl}$  (**Au5**).

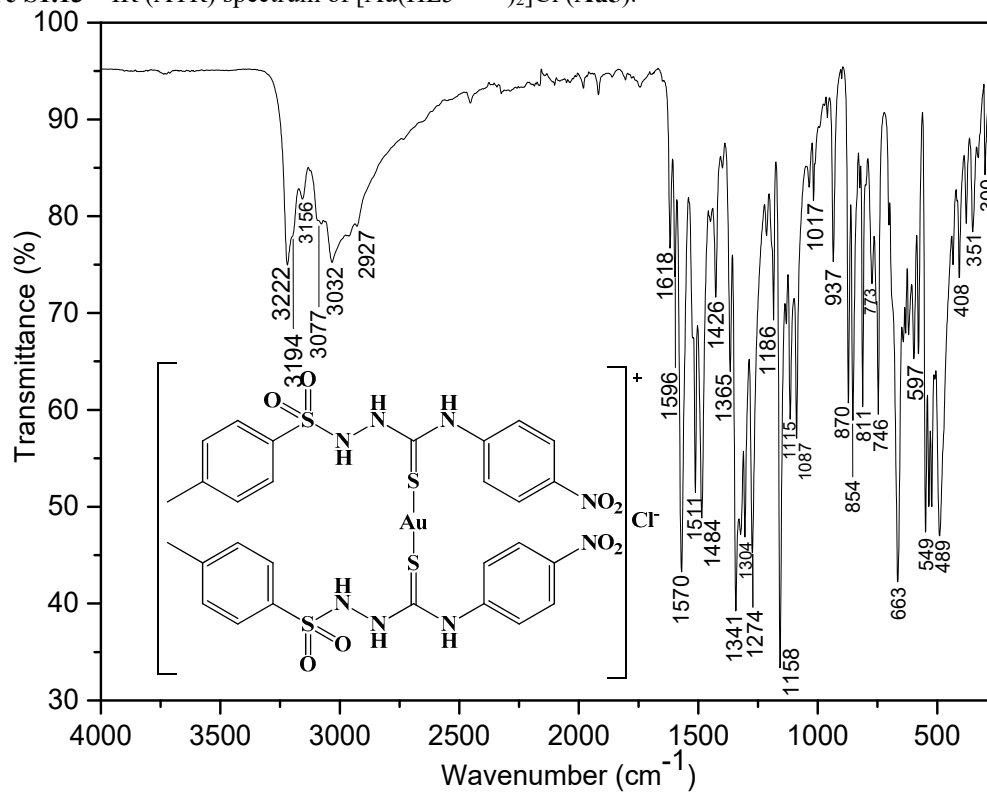

**Figure S1.14** - IR (ATR) spectrum of  $[\text{Au}(\text{HL}6^{\text{Al}})_2]\text{Cl}$  (**Au6**).

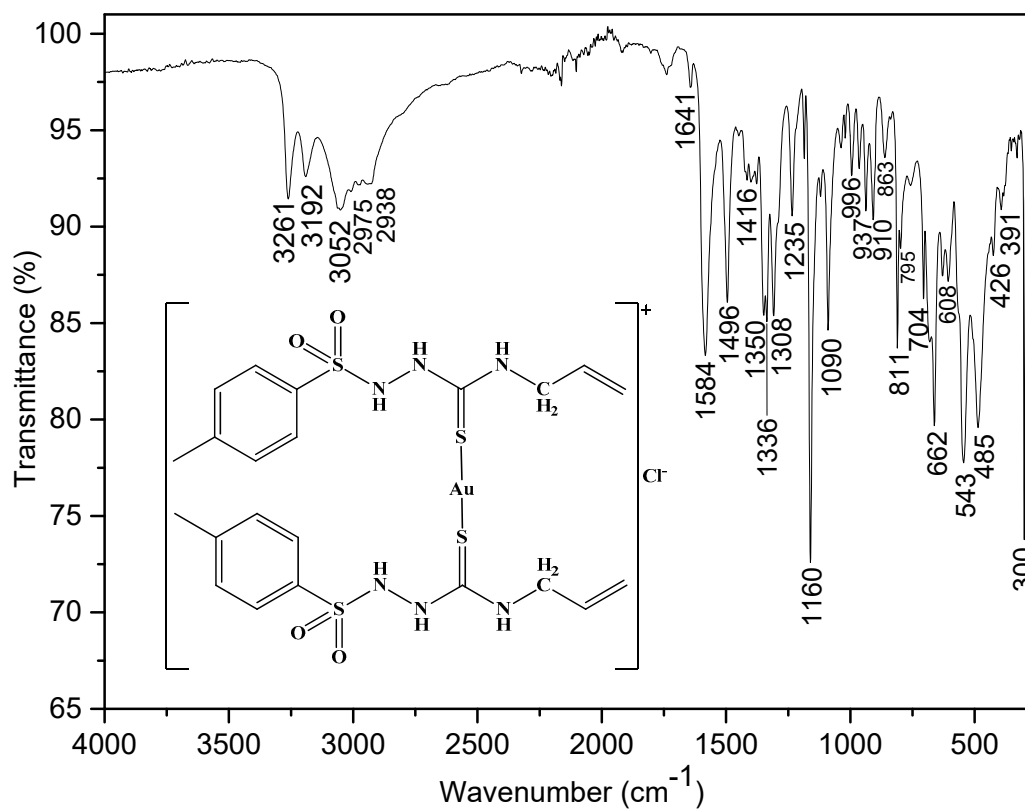



**Table S1** - Selected absorption bands in the infrared region for free ligands and complexes.

| Compound                              | Selected bands/ $\text{cm}^{-1}$ |                    |             |                          |                        |             |
|---------------------------------------|----------------------------------|--------------------|-------------|--------------------------|------------------------|-------------|
|                                       | $\nu$ (N-H)                      | $\nu$ (-NH-CS-NH-) | $\nu$ (N-O) | $\nu_{\text{ass}}$ (S=O) | $\nu_{\text{s}}$ (S=O) | $\nu$ (C=S) |
| <b>HL1<sup>Ch</sup></b>               | 3371/3228/3167                   | 1597               | —           | 1352/1330                | 1166                   | 808         |
| <b>HL2<sup>Ph</sup></b>               | 3329/3228/3136                   | 1597               | —           | 1342/1328                | 1165                   | 806         |
| <b>HL3<sup>FPh</sup></b>              | 3320/3240/3133                   | 1596               | —           | 1333                     | 1156                   | 814         |
| <b>HL4<sup>ClPh</sup></b>             | 3306/3290/3145                   | 1600/1584          | —           | 1341                     | 1161                   | 806         |
| <b>HL5<sup>NO<sub>2</sub>Ph</sup></b> | 3308/3240/3136                   | 1615/1597          | 1424        | 1331                     | 1158                   | 807         |
| <b>HL6<sup>Al</sup></b>               | 3358/3160                        | 1600               | —           | 1348                     | 1170                   | 809         |
| <b>Ag3</b>                            | 3233/3183/3156                   | 1609               | 1416        | 1332                     | 1160                   | 786         |
| <b>Ag4</b>                            | 3228/3184/3166                   | 1593               | 1409        | 1332                     | 1160                   | 784         |
| <b>Ag5</b>                            | 3385/3306/3217/3155              | 1619/1596          | 1418/1400   | 1318                     | 1154                   | —           |
| <b>Ag6</b>                            | 3265/3225                        | 1646               | 1418        | 1327                     | 1134                   | 781         |
| <b>Au1</b>                            | 3307/3286/3193                   | 1600               | —           | 1330                     | 1164                   | 789         |
| <b>Au2</b>                            | 3233/3161/3131                   | 1597               | —           | 1352                     | 1162                   | 798         |
| <b>Au3</b>                            | 3235/3202/3160                   | 1613/1598          | —           | 1324                     | 1156                   | 773         |
| <b>Au4</b>                            | 3222/3158/3119                   | 1591               | —           | 1351                     | 1160                   | 798         |
| <b>Au5</b>                            | 3222/3194/3156                   | 1641               | 1426        | 1350                     | 1160                   | 795         |
| <b>Au6</b>                            | 3261/3192                        | 1618/1596          | —           | 1341                     | 1158                   | 773         |

Figure S2.1 –  $^1\text{H}$  NMR spectrum of HL3<sup>FPh</sup> in DMSO- $d_6$ .

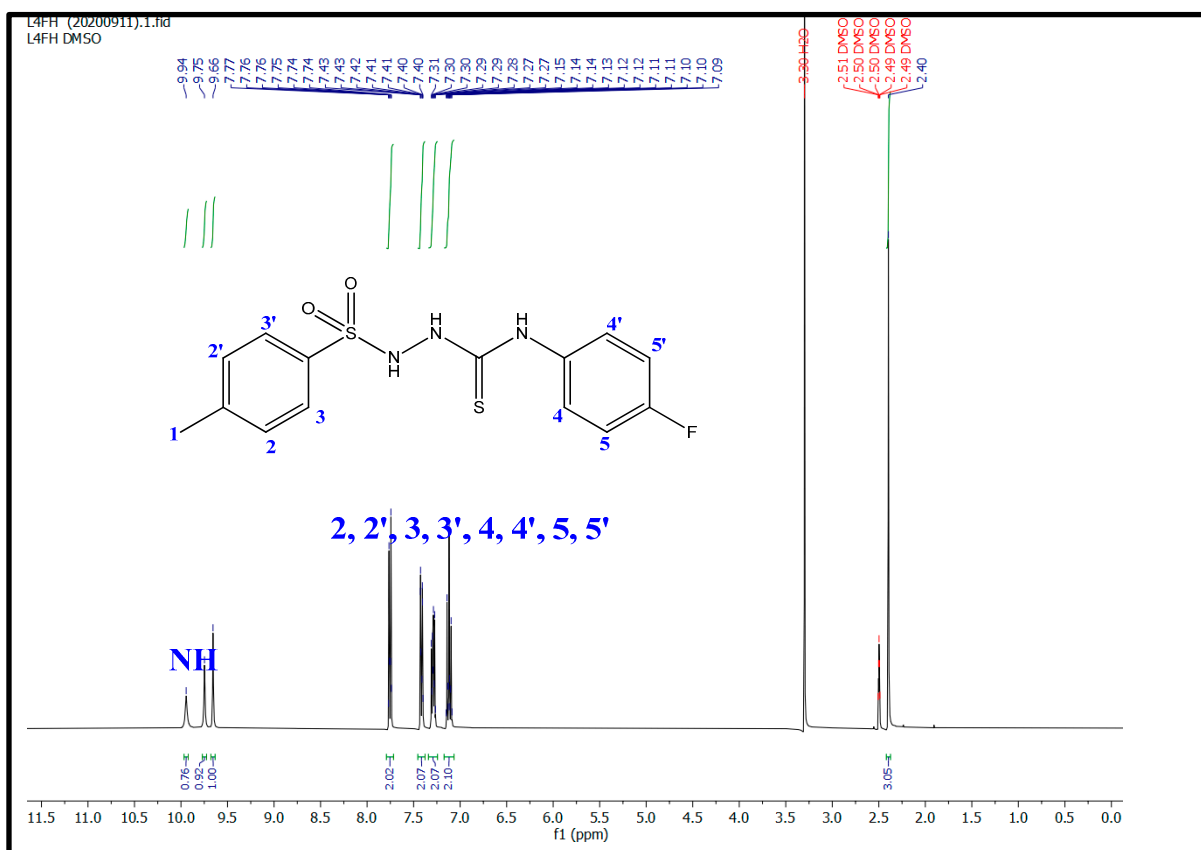

Figure S2.2 –  $^1\text{H}$  NMR spectrum of HL4<sup>ClPh</sup> in DMSO- $d_6$ .

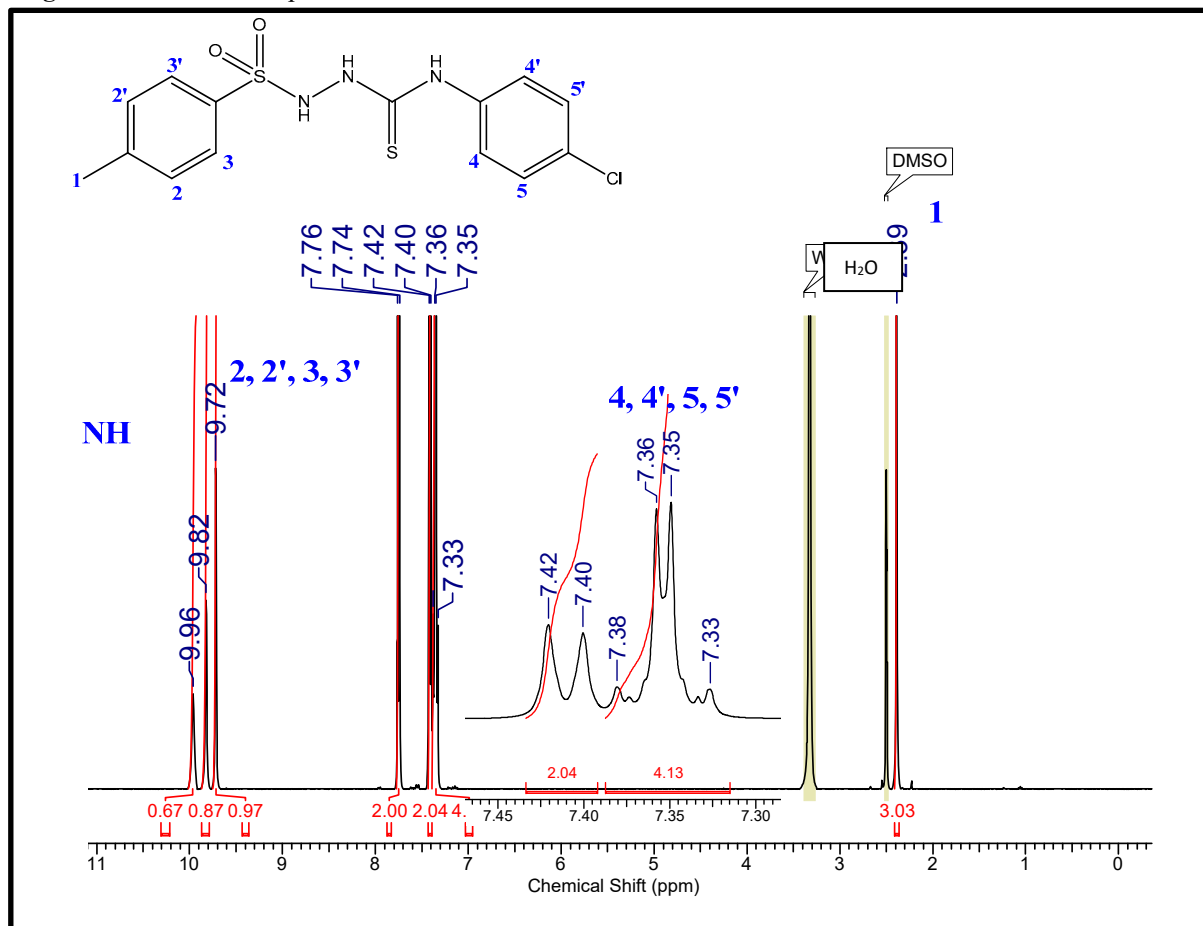

Figure S2.3 –  $^1\text{H}$  NMR spectrum of HL5<sup>NO<sub>2</sub>Ph</sup> in DMSO-*d*<sub>6</sub>.

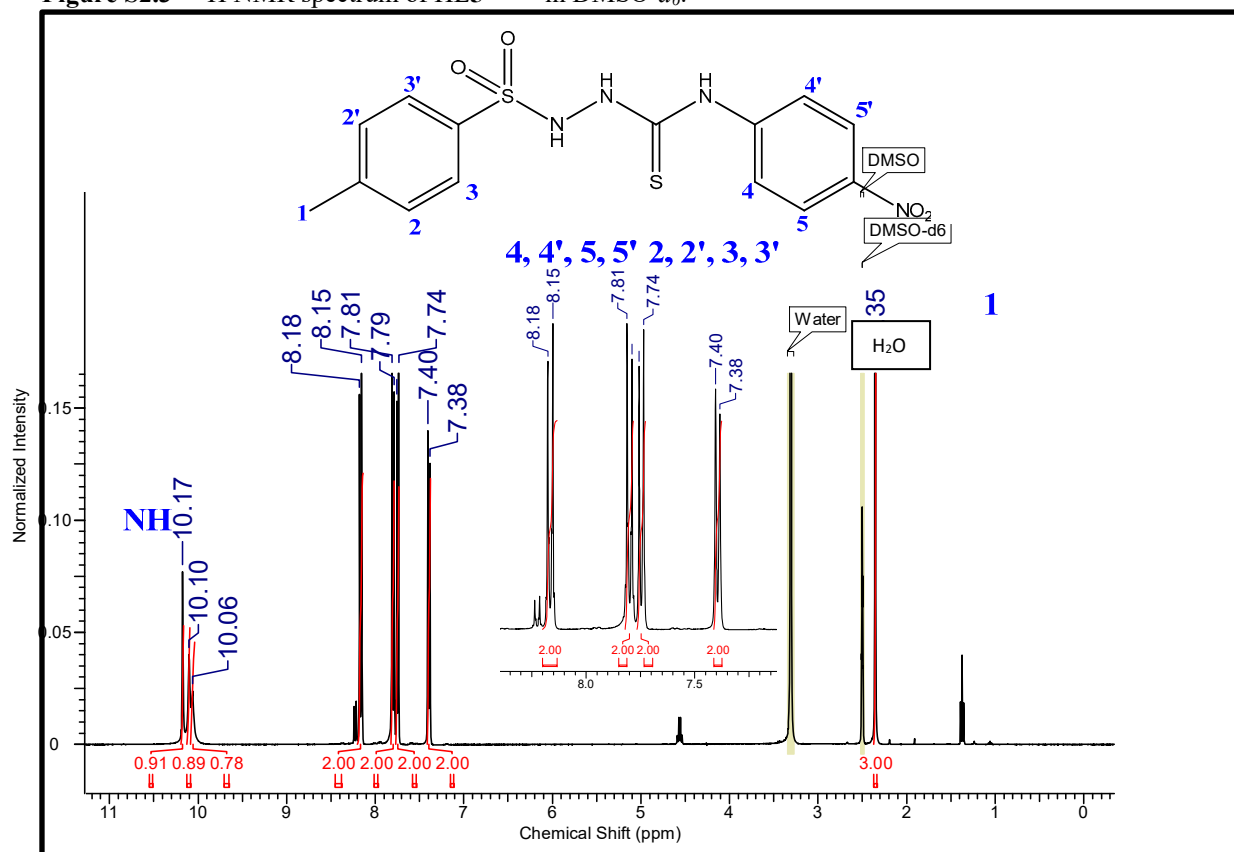

Figure S2.4 –  $^1\text{H}$  NMR spectrum of HL6<sup>Al</sup> in DMSO-*d*<sub>6</sub>.

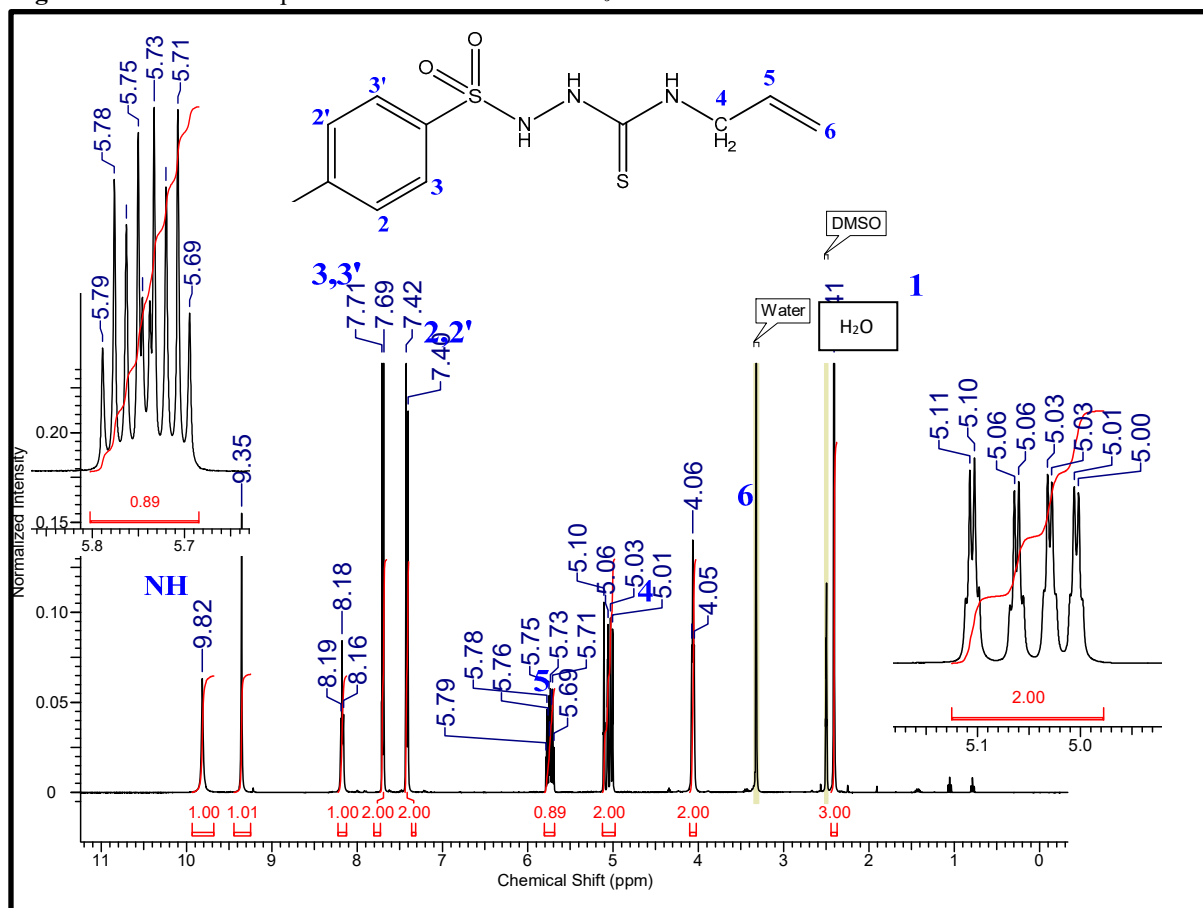

**Figure S2.5** –  $^{19}\text{F}$  NMR spectrum (377 MHz) of  $\text{HL3}^{\text{FPh}}$  in  $\text{DMSO-}d_6$ .

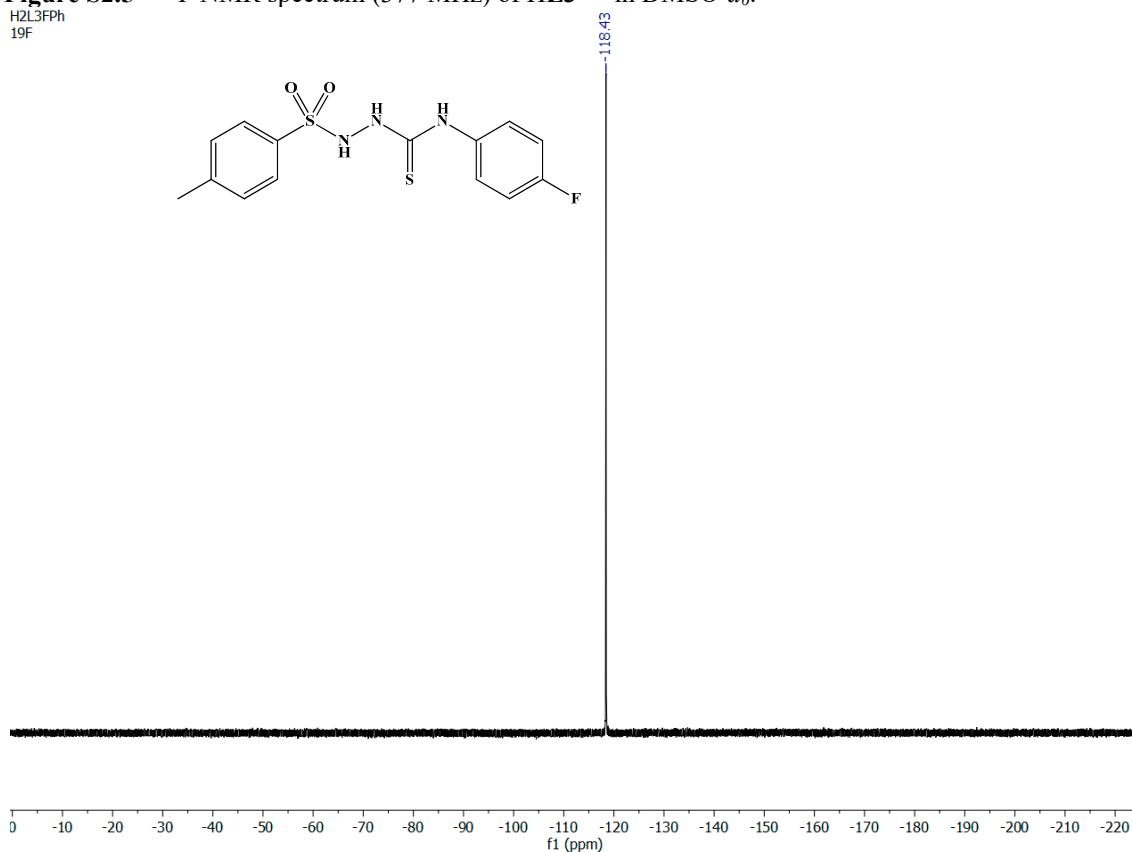

**Figure S2.6** –  $^1\text{H}$  NMR spectrum of  $[\text{Ag}(\text{HL3}^{\text{FPh}})_2]\text{NO}_3$  (**Ag3**) in  $\text{DMSO-}d_6$ .

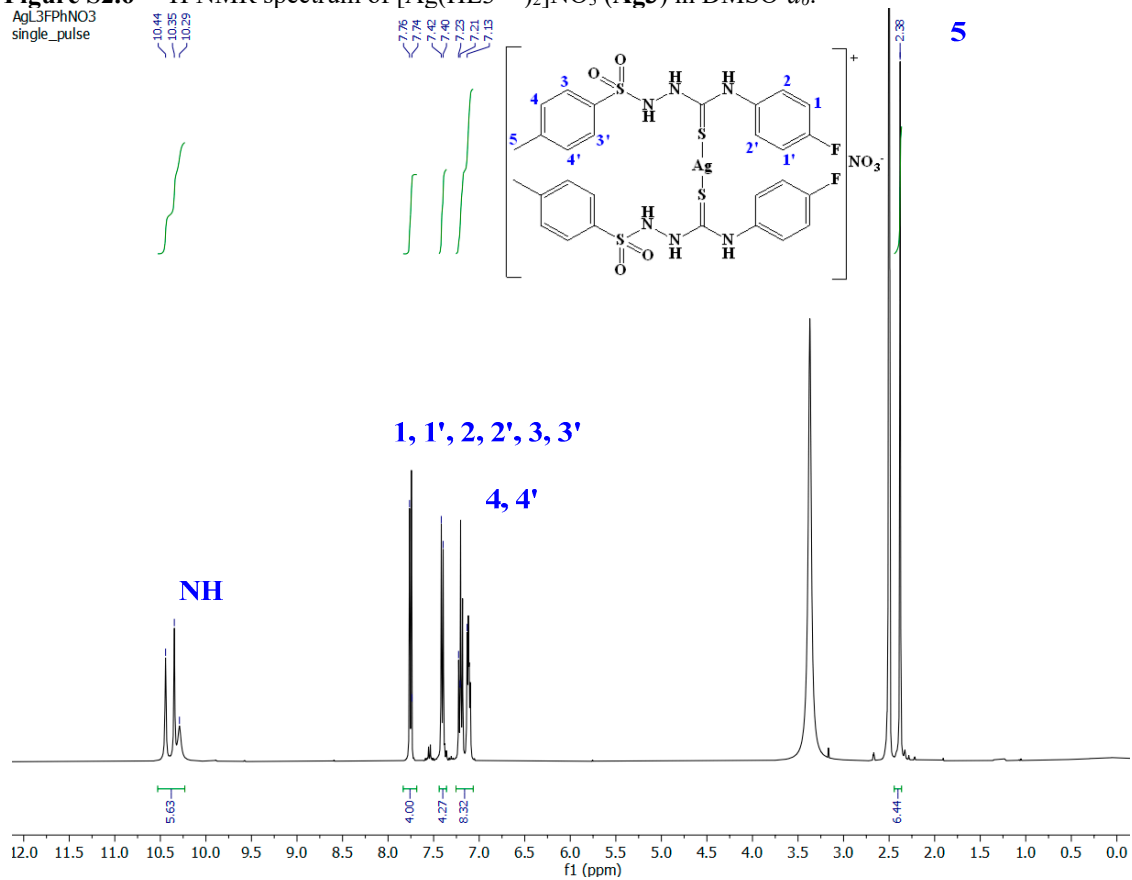

Figure S2.7 –  $^1\text{H}$  NMR spectrum of  $[\text{Ag}(\text{HL}4^{\text{ClPh}})_2]\text{NO}_3$  (**Ag4**) in  $\text{DMSO}-d_6$ .

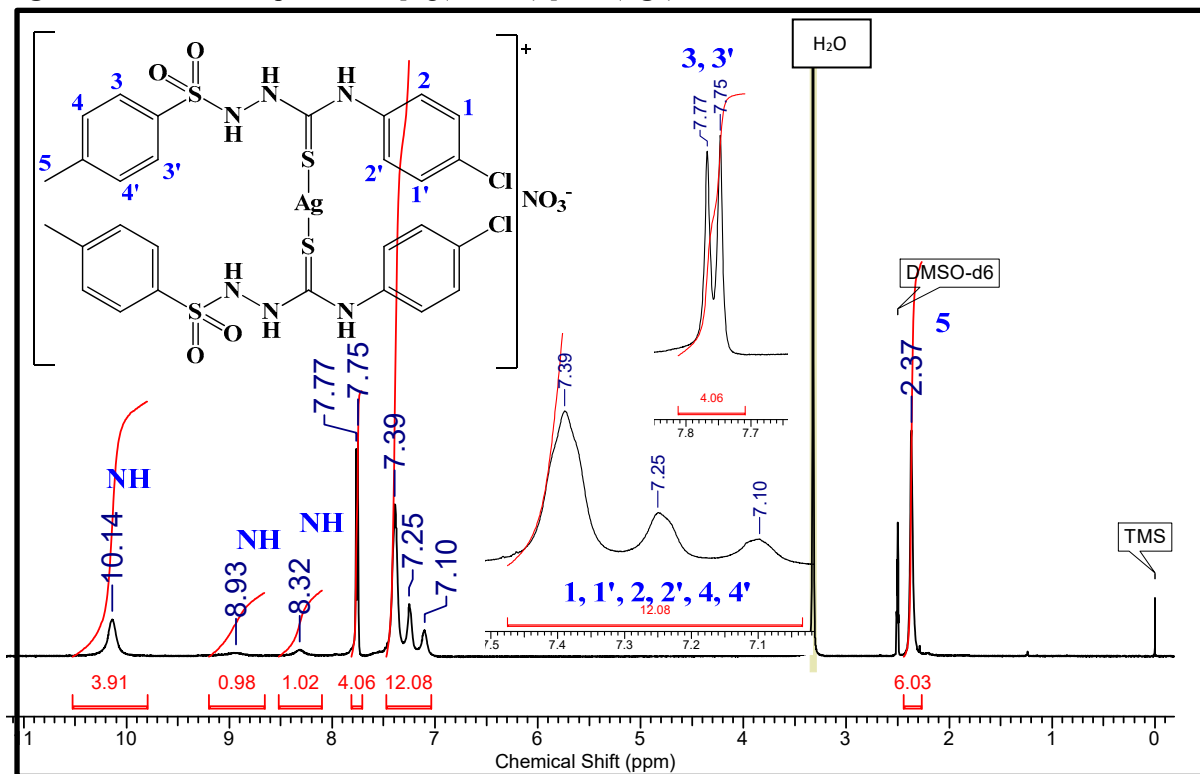

Figure S2.8 –  $^1\text{H}$  NMR spectrum of  $[\text{Ag}(\text{HL}5^{\text{NO}_2\text{Ph}})_2]\text{NO}_3$  (**Ag5**) in  $\text{DMSO}-d_6$ .

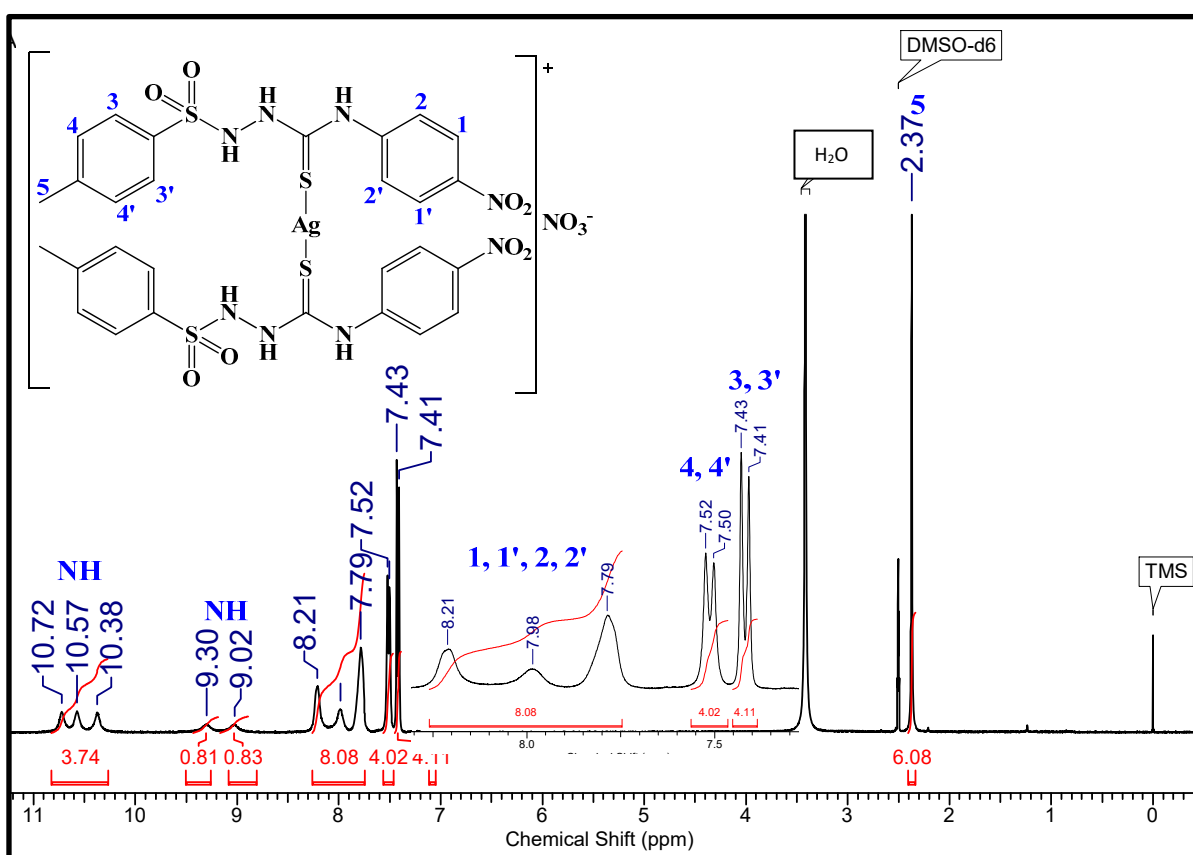

Figure S2.9 –  $^1\text{H}$  NMR spectrum of  $[\text{Ag}(\text{HL6}^{\text{Al}})_2]\text{NO}_3$  (**Ag6**) in  $\text{DMSO}-d_6$ .

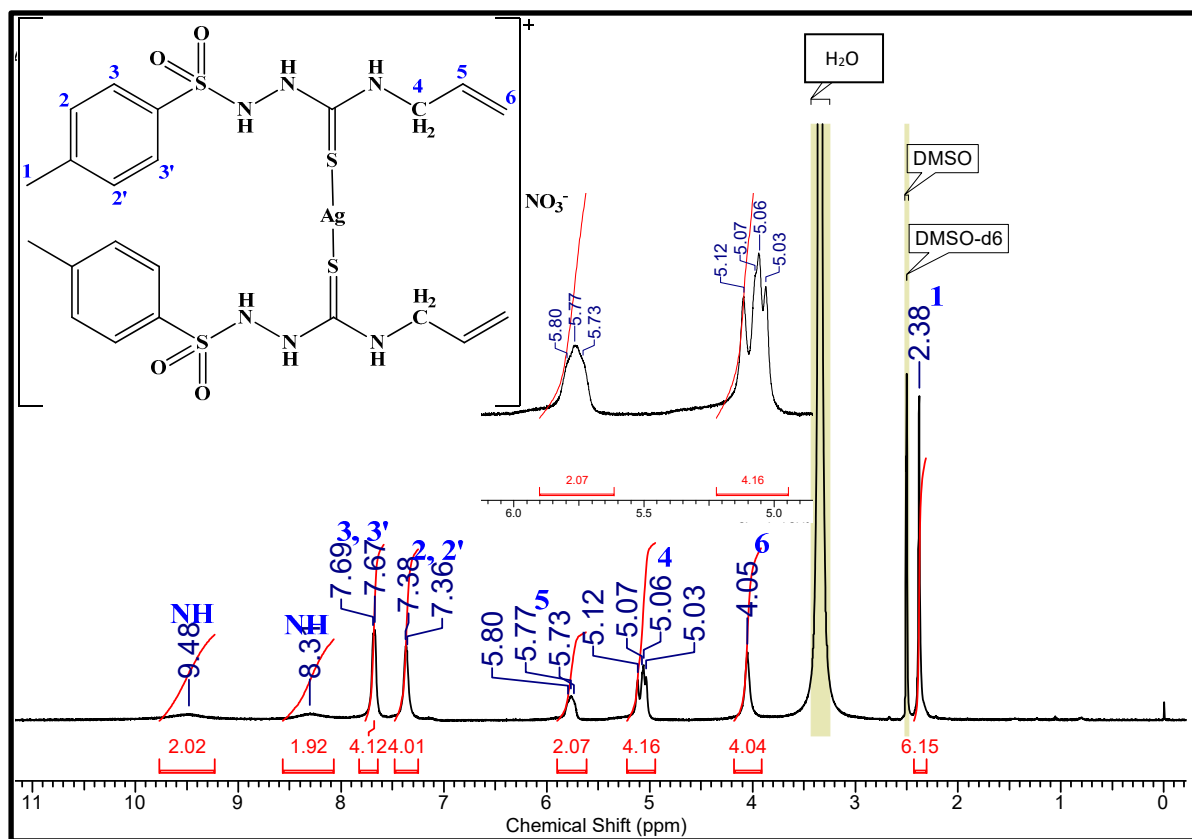

Figure S2.10 –  $^1\text{H}$  NMR spectrum of  $[\text{Au}(\text{HL1}^{\text{Ch}})_2]\text{Cl}$  (**Au1**) in  $\text{DMSO}-d_6$ .

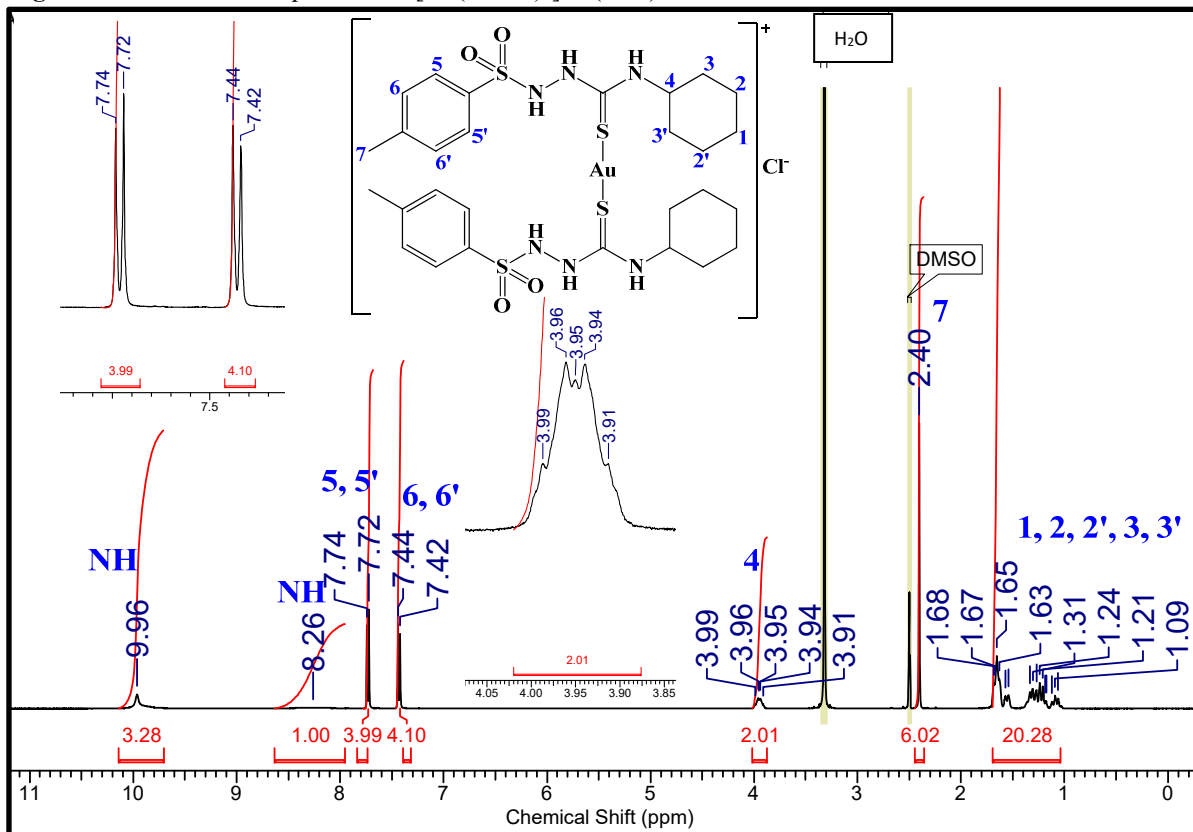

**Figure S2.11** –  $^1\text{H}$  NMR spectrum of  $[\text{Au}(\text{HL}2^{\text{Ph}})_2]\text{Cl}$  (**Au2**) in  $\text{DMSO-}d_6$ .

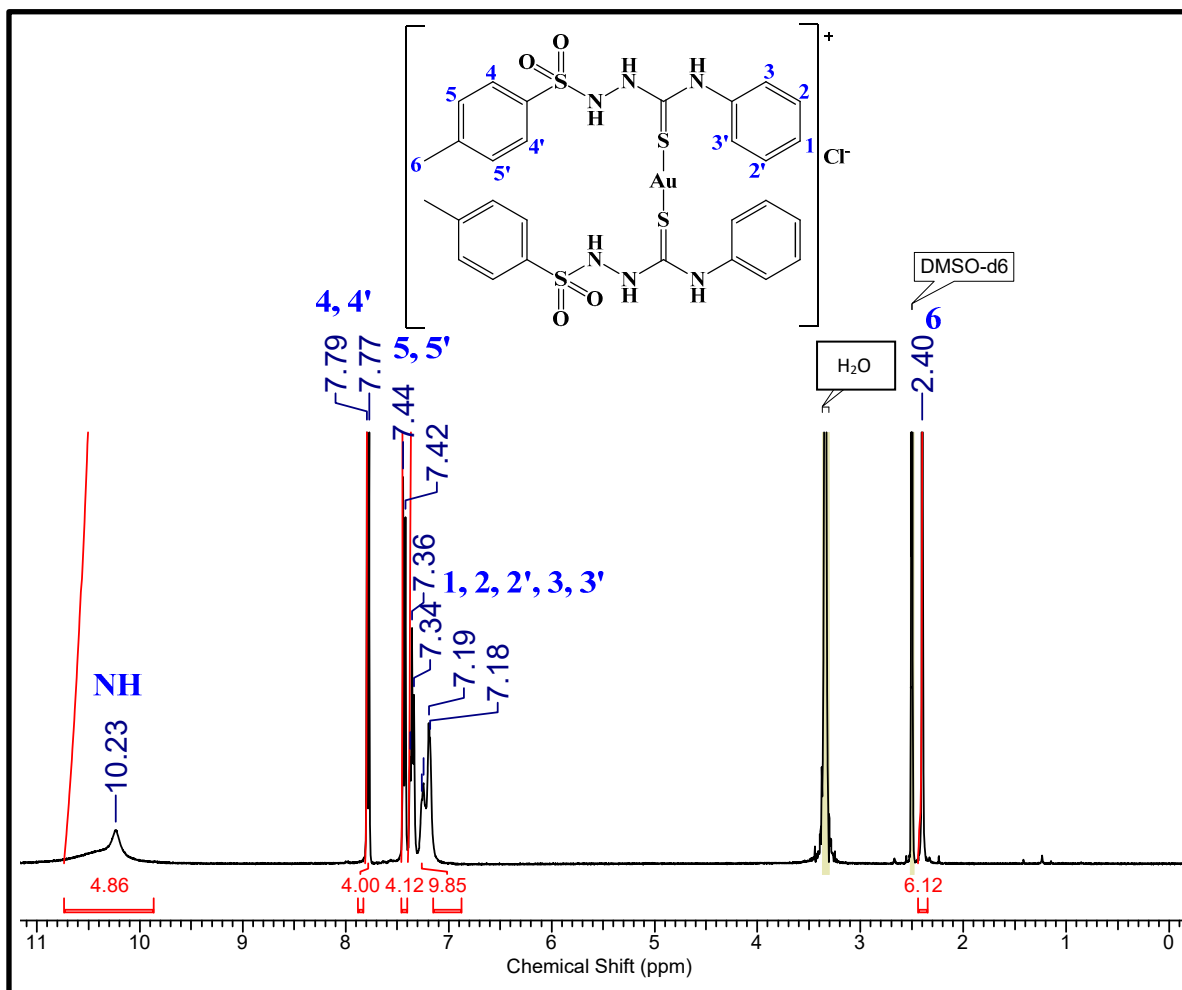

**Figure S2.12** –  $^1\text{H}$  NMR spectrum of  $[\text{Au}(\text{HL}3^{\text{FPh}})_2]\text{Cl}$  (**Au3**) in  $\text{DMSO-}d_6$ .

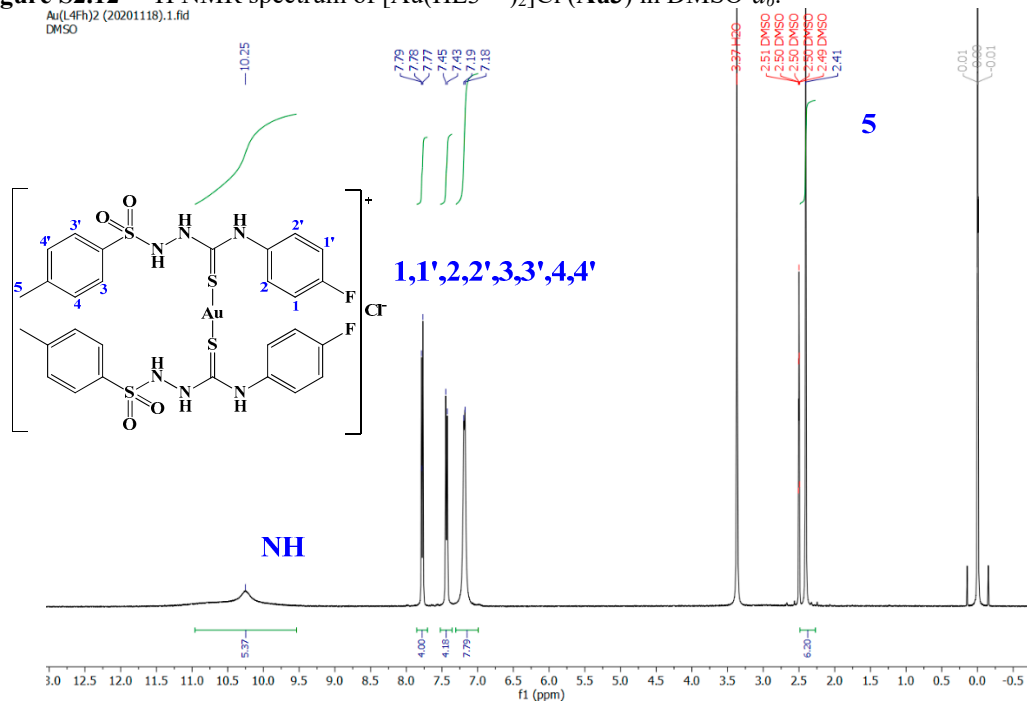

**Figure S2.13** –  $^1\text{H}$  NMR spectrum of  $[\text{Au}(\text{HL4}^{\text{ClPh}})_2]\text{Cl}$  (**Au4**) in  $\text{DMSO-}d_6$ .

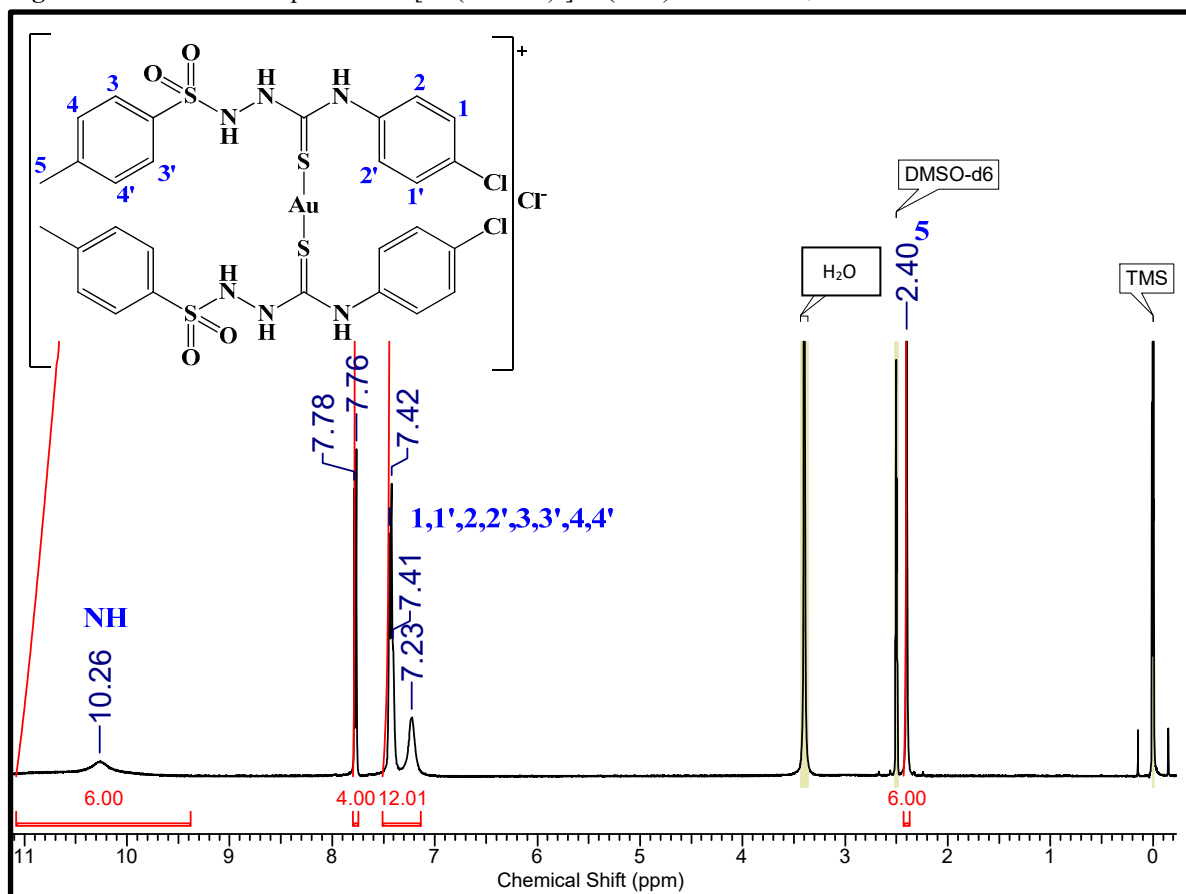

**Figure S2.14** –  $^1\text{H}$  NMR spectrum of  $[\text{Au}(\text{HL5}^{\text{NO}_2\text{Ph}})_2]\text{Cl}$  (**Au5**) in  $\text{DMSO-}d_6$ .

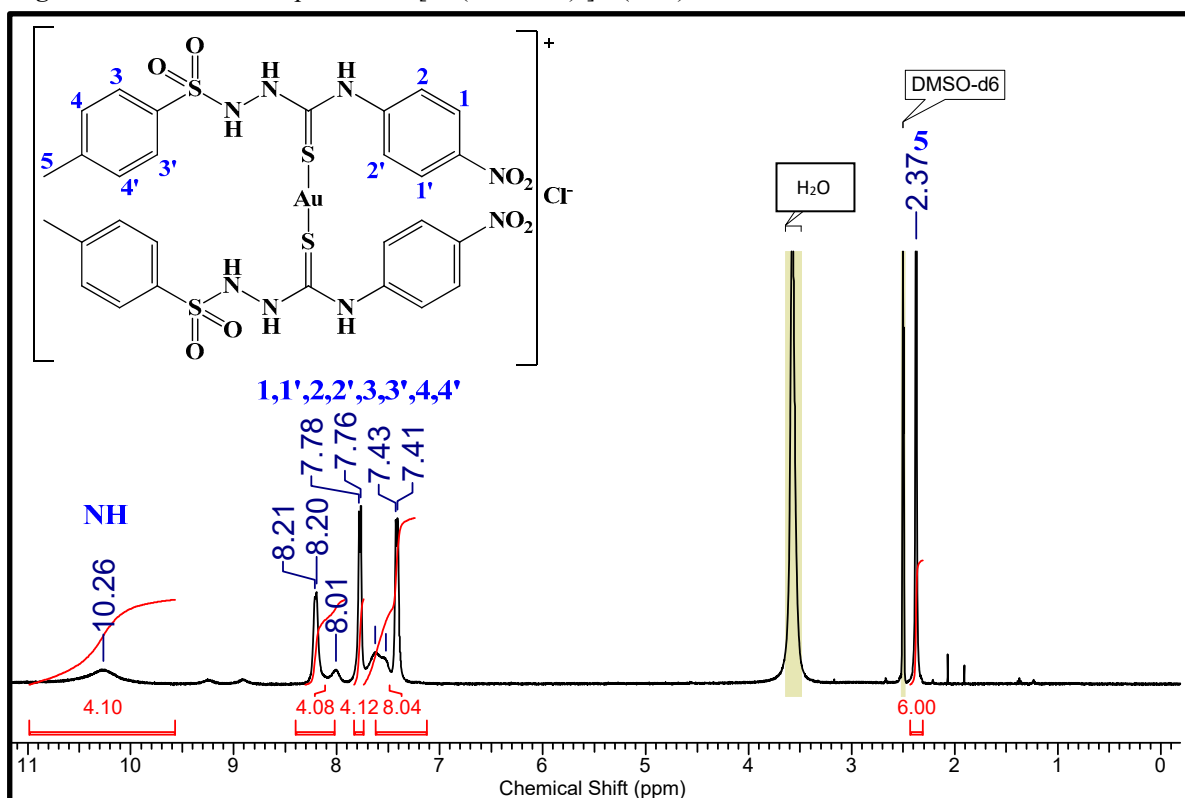



**Figure S2.15** –  $^1\text{H}$  NMR spectrum of  $[\text{Au}(\text{HL6}^{\text{Al}})_2]\text{Cl}$  (**Au6**) in  $\text{DMSO-}d_6$ .

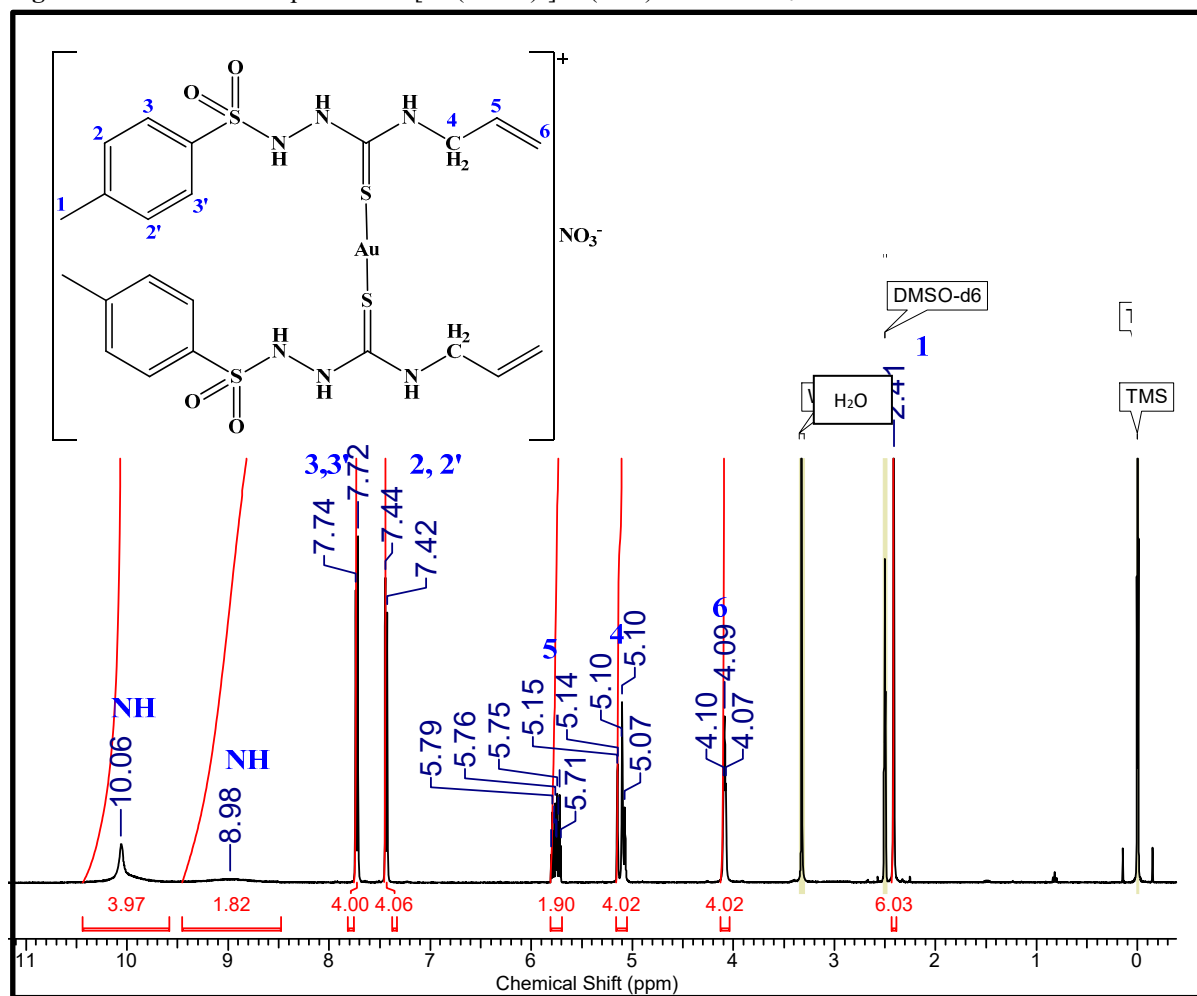

**Figure S2.16** –  $^{19}\text{F}$  NMR spectrum (377 MHz) of  $[\text{Ag}(\text{HL3}^{\text{FPh}})_2]\text{NO}_3$  (**Ag3**) in  $\text{DMSO-}d_6$ .

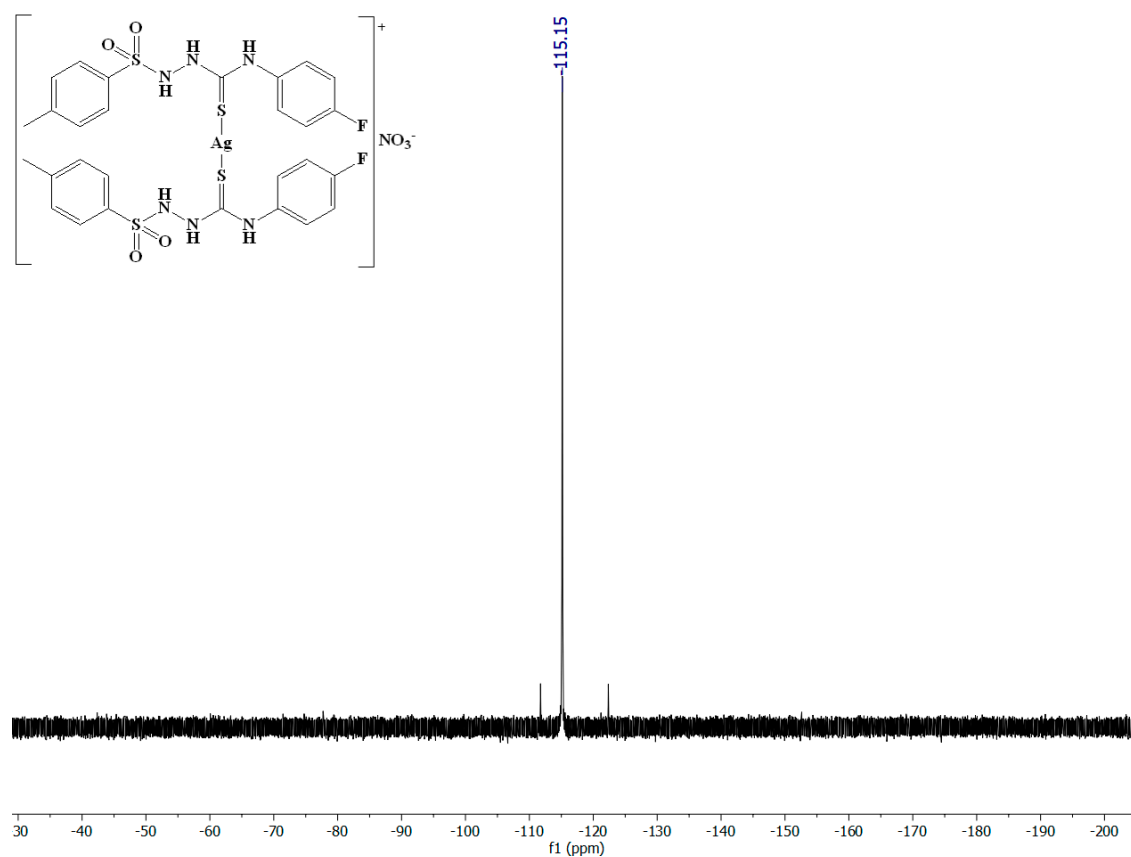

**Figure S2.17** –  $^{19}\text{F}$  NMR spectrum (377 MHz) of  $[\text{Au}(\text{HL3}^{\text{FPh}})_2]\text{Cl}$  (**Au3**) in  $\text{DMSO-}d_6$ .

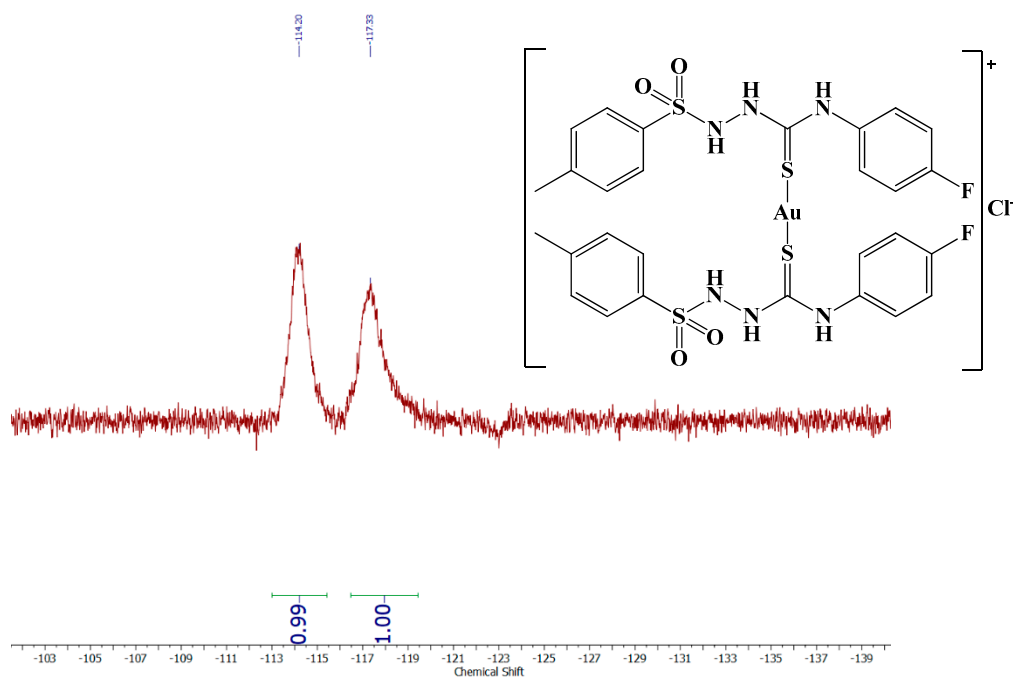

**Figure S3.1** – ESI(+) MS spectrum of [Ag(HL3<sup>FPh</sup>)<sub>2</sub>]NO<sub>3</sub> (**Ag3**).

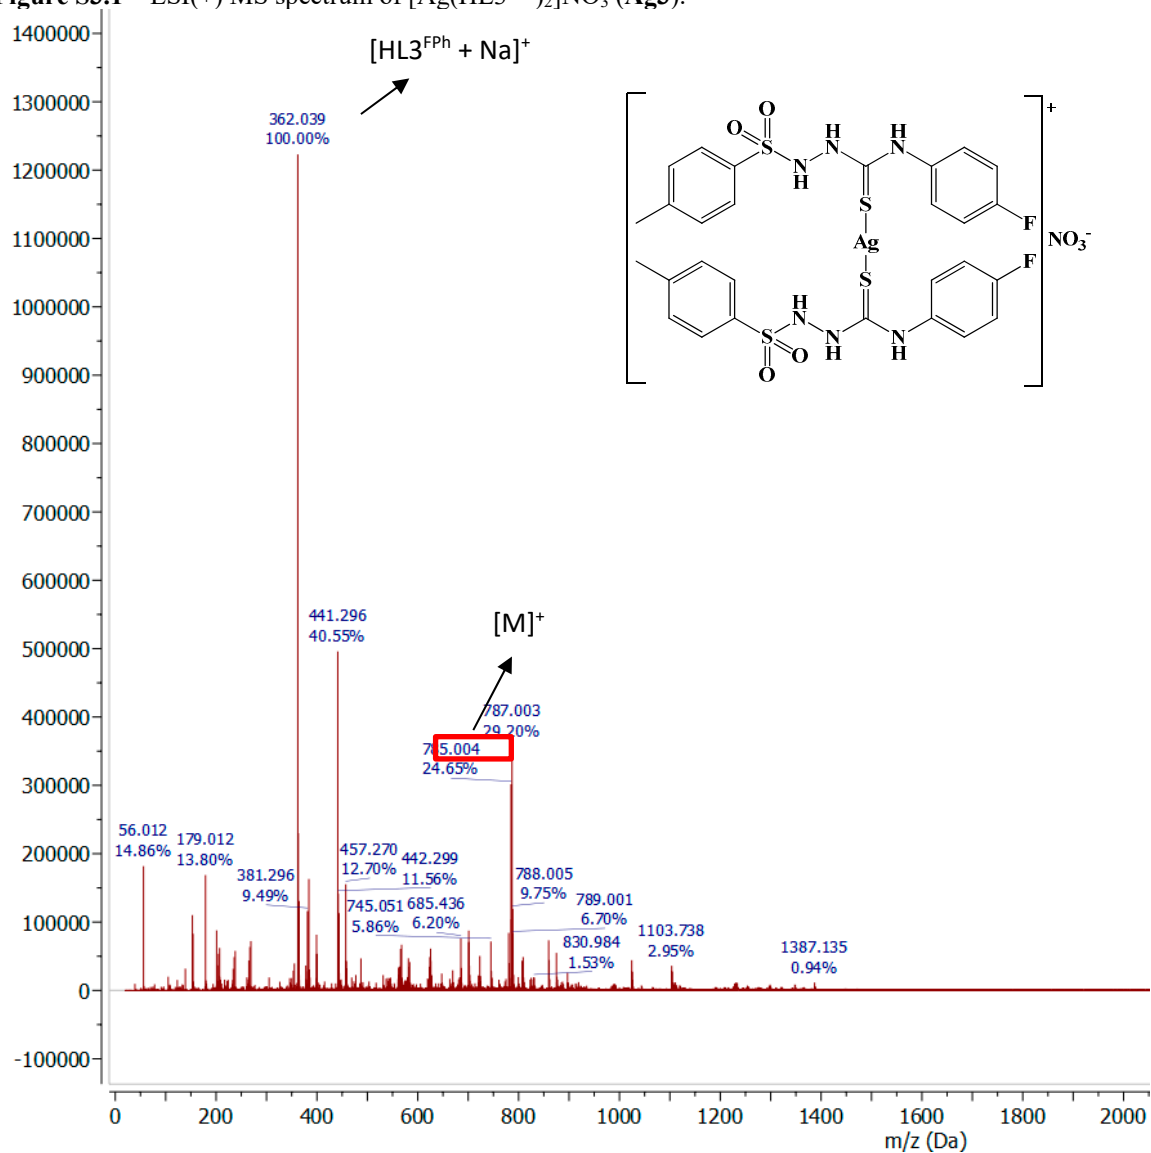

**Figure S3.2** – ESI(+) MS spectrum of  $[\text{Au}(\text{HL1}^{\text{Ch}})_2]\text{Cl}$  (**Au1**).

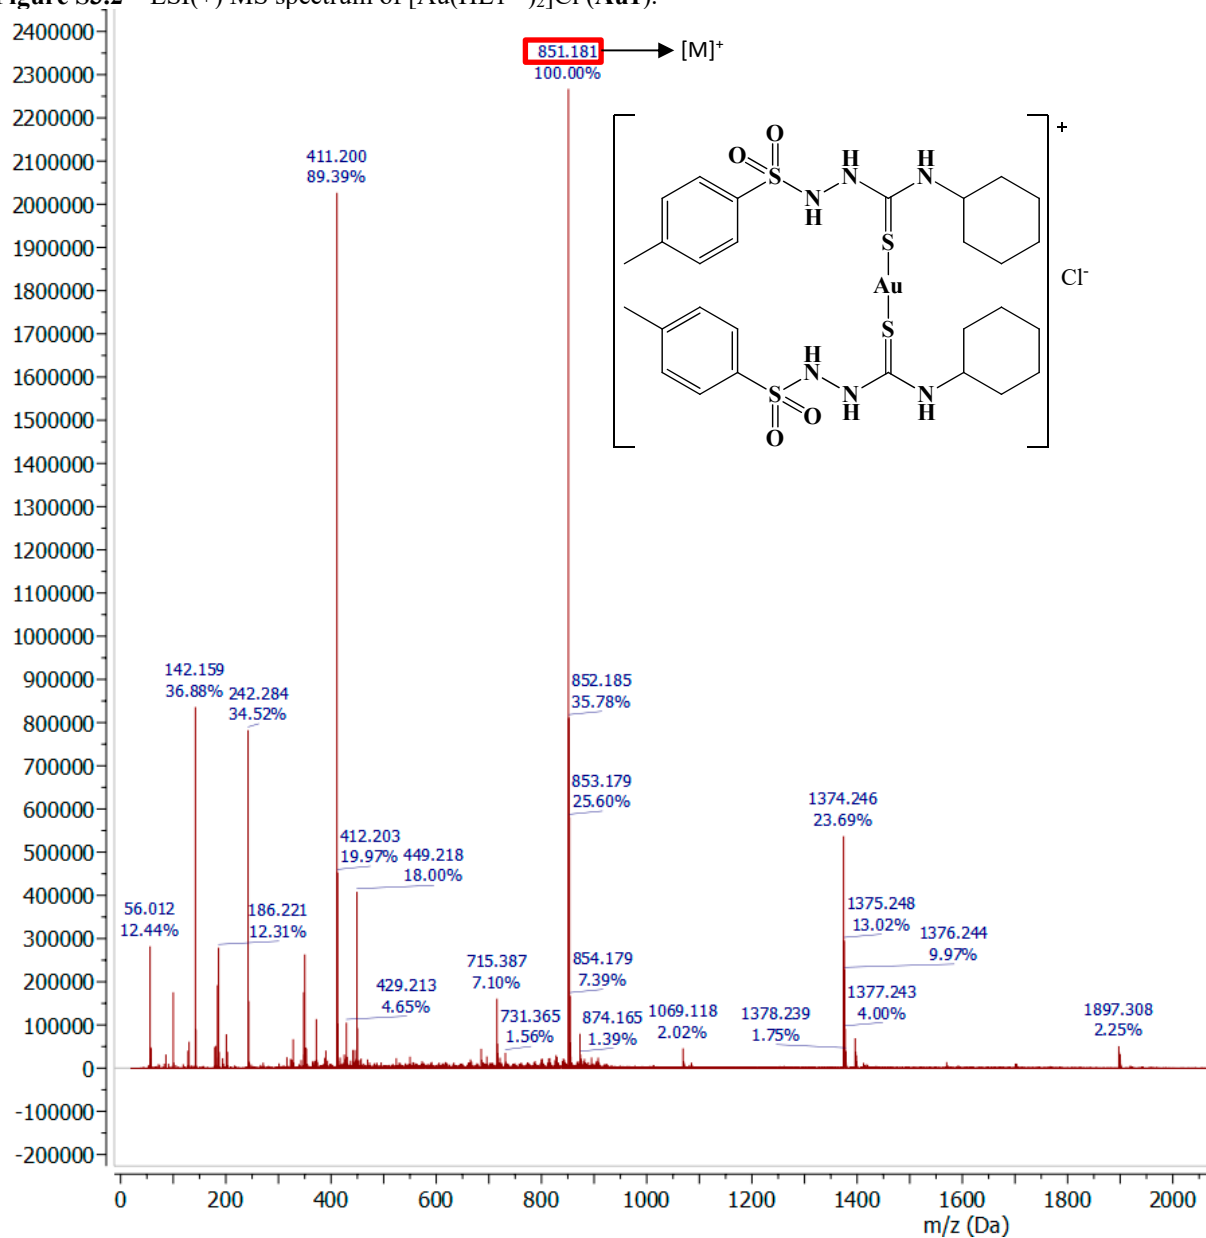

**Figure S3.27** – ESI(+) MS spectrum of  $[\text{Au}(\text{HL2}^{\text{Ph}})_2]\text{Cl}$  (**Au2**).

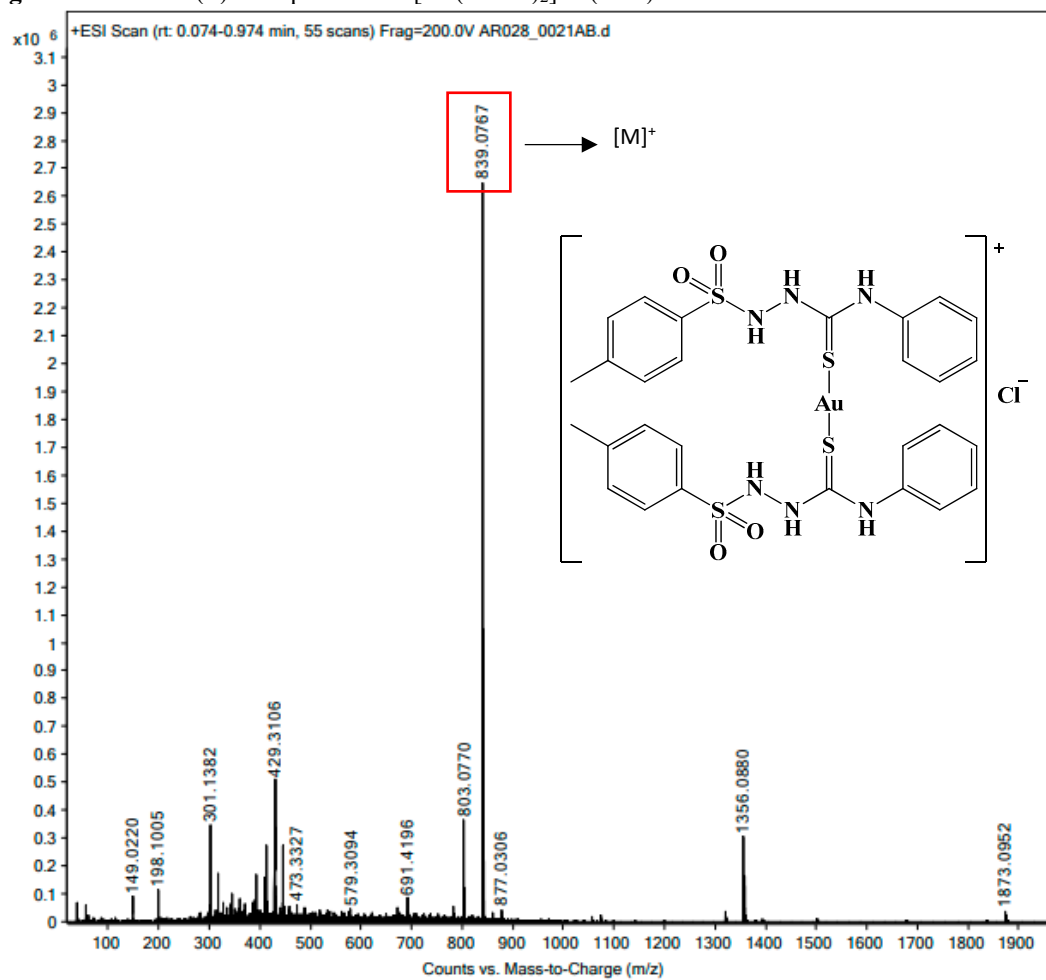

**Figure S3.28** – ESI(+) MS spectrum of  $[\text{Au}(\text{HL3}^{\text{FPh}})_2]\text{Cl}$  (**Au3**).

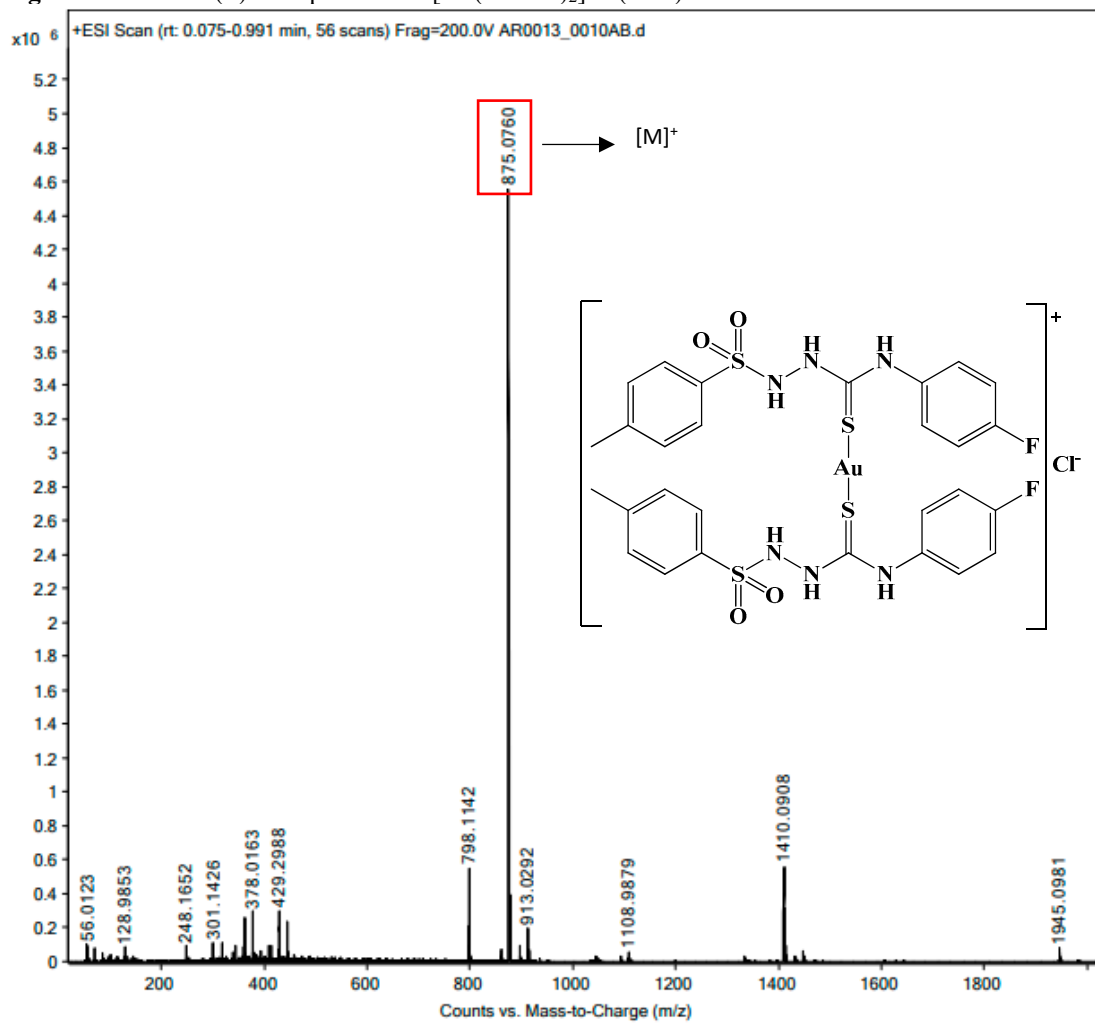

**Figure S3.29** – ESI(+) MS spectrum of  $[\text{Au}(\text{HL4}^{\text{ClPh}})_2]\text{Cl}$  (**Au4**).

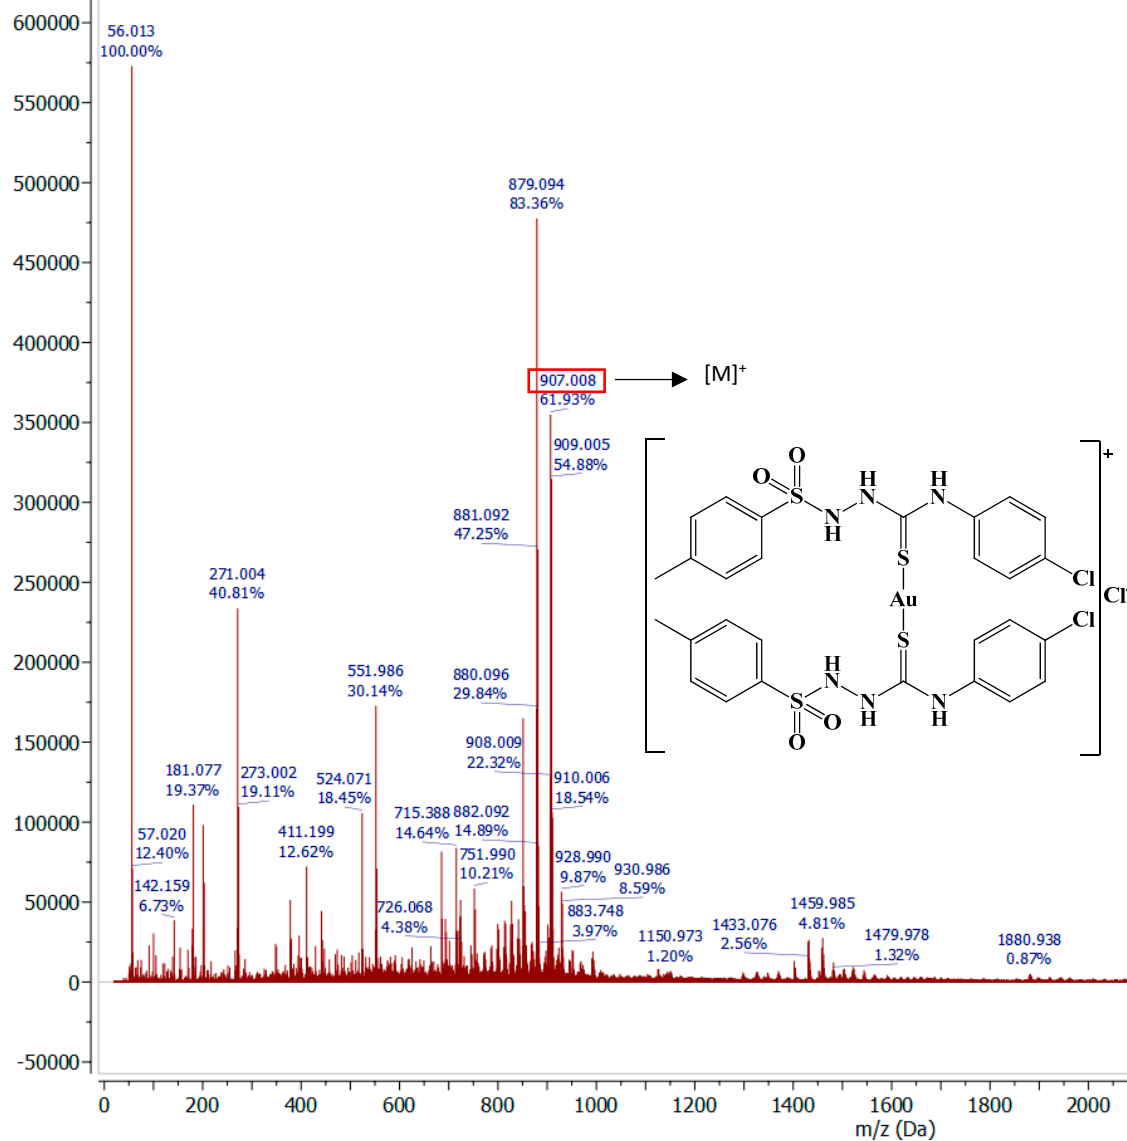

**Figure S3.30** – ESI(+) MS spectrum of  $[\text{Au}(\text{HL6}^{\text{Al}})_2]\text{Cl}$  (**Au6**).

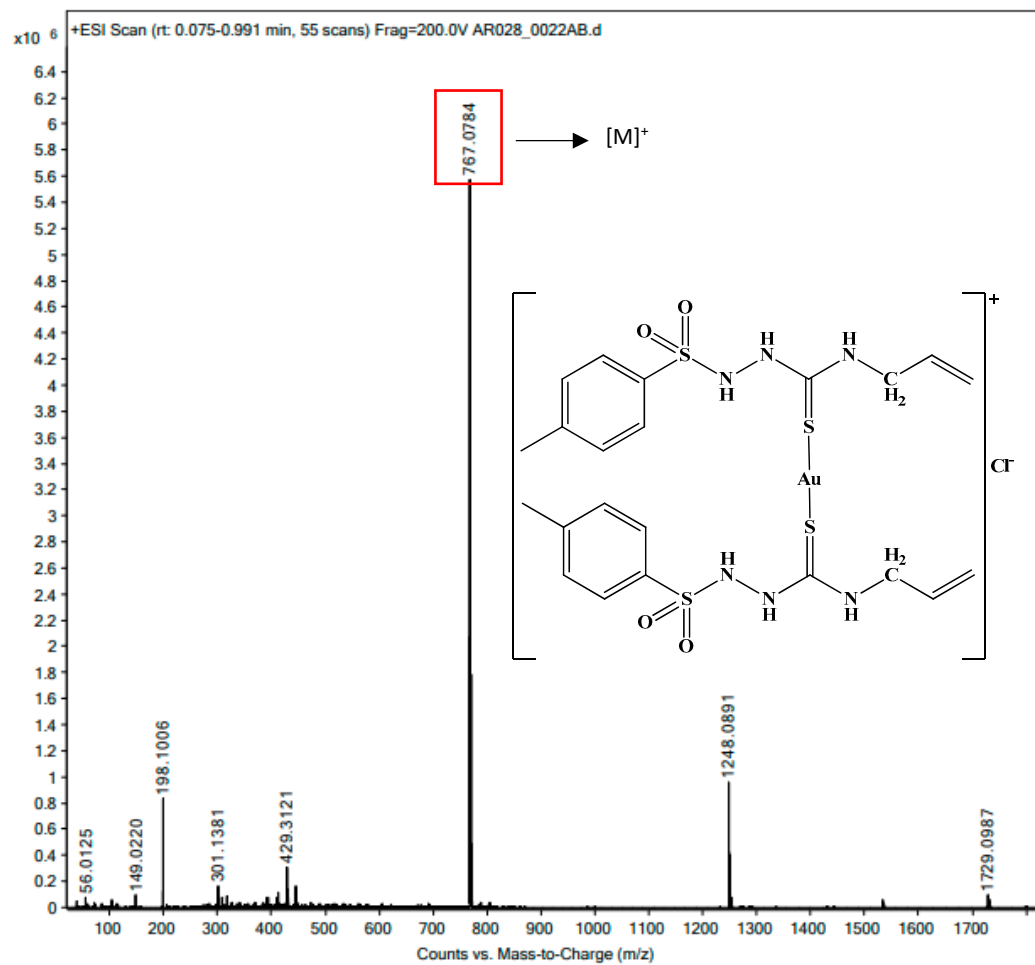



**Figure S4.1** – Hydrogen bonds involved in the crystalline structure of the **HL3<sup>FPh</sup>** ligand. Intermolecular hydrogen bonds: [N(1)⋯O(1) = 2.910(3) Å, N(1)-H(1)⋯O(1) = 115.4°], [N(2)⋯S(1) = 3.311(2) Å, N(2)-H(2)⋯S(1) = 160.8°], [N(1)⋯O(2) = 3.420(3) Å, N(1)-H(1)⋯O(2) = 98.1°], [N(3)⋯O(2) = 2.959(2) Å, N(3)-H(3)⋯O(2) = 147.7°]. Intramolecular hydrogen bonding: [N(3)⋯N(1) = 2.659(3) Å, N(3)-H(3)⋯N(1) = 110.3°]. Symmetry operations used (') x-1, y, z, (') -x, -y+1, -z+1 and (') -x, -y+2, -z+1. Red dotted lines (between donor and acceptor atoms) represent hydrogen bonds.

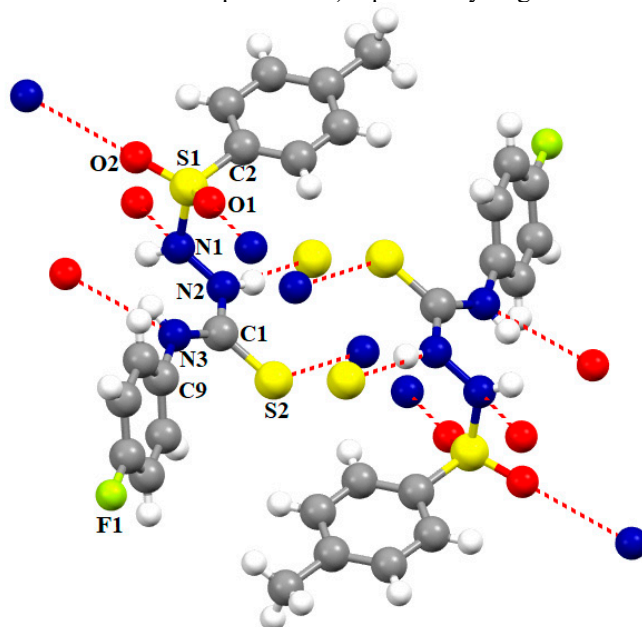

**Figure S4.2** - Hydrogen bonds involved in the crystalline structure of the **HL5<sup>N02Ph</sup>** ligand. Intermolecular hydrogen bonds: [N(1)⋯O(1') = 2.887(4) Å, N(1)-H(1)⋯O(1') = 117.4°], [N(2)⋯S(1'') = 3.347(3) Å, N(2)-H(2)⋯S(1'') = 165.2°], [N(3)⋯O(2''') = 3.040(4) Å, N(3)-H(3)⋯O(2''') = 151.8°]. Symmetry operations used (') x-1,y,z, (') -x, -y+1, -z+1 and (') -x,-y,-z+1. Blue dotted lines (between donor and acceptor atoms) represent hydrogen bonds.

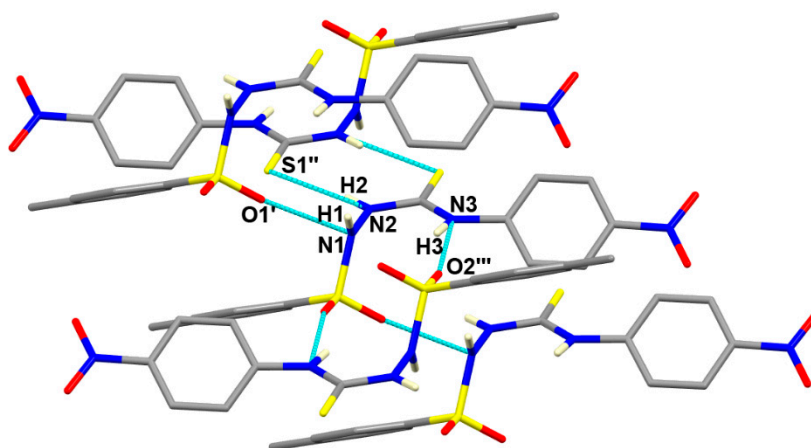

**Figure S4.31** - Hydrogen bonds involved in the crystalline structure of the **HL6<sup>Al</sup>** ligand. Intermolecular hydrogen bonds: [N(3)⋯O(2) = 3.024(3) Å, N(3)-H(3)⋯O(2)= 129.0°], [N(2)⋯S(1) = 3.3475(18) Å, N(2)-H(2)⋯S(1) = 159.0°], [N(1)⋯S(1) = 3.356(2) Å, N(1)-H(1)⋯S(1)= 118.4°]. Symmetry operations used (') -x, -y, -z+1, (') -x+1, -y+1, -z+1 and (') x-1, y, z. Blue dotted lines (between donor and acceptor atoms) represent hydrogen bonds.

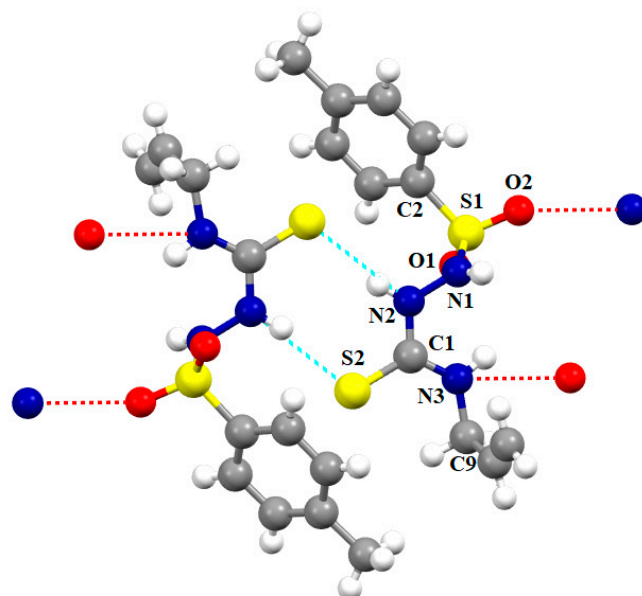

**Figure S4.4** Ellipsoid representation of [Au(HL1<sup>Ch</sup>)<sub>2</sub>]Cl·CH<sub>3</sub>OH (**Au1**·CH<sub>3</sub>OH). The hydrogen atoms have been omitted for clarity. A solvent mask was calculated and 108 electrons were found in a volume of 518 Å<sup>3</sup> in 1 void per unit cell. This is consistent with the presence of 0.5[CH<sub>2</sub>Cl<sub>2</sub>; 2H<sub>2</sub>O] per Asymmetric Unit which account for 120 electrons per unit cell.

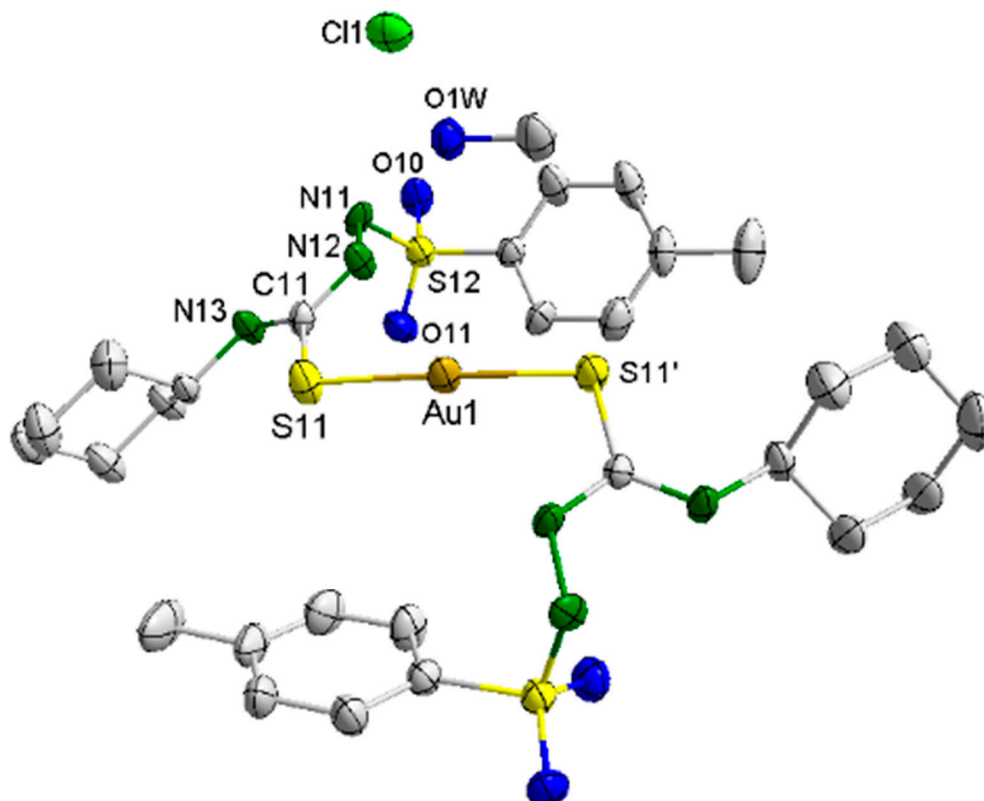

**Figure S4.5** Ellipsoid representation of  $[\text{Au}(\text{HL2}^{\text{Ph}})_2]\text{Cl}\cdot\text{CH}_3\text{OH}$  (**Au2** $\cdot\text{CH}_3\text{OH}$ ). The hydrogen atoms have been omitted for clarity.

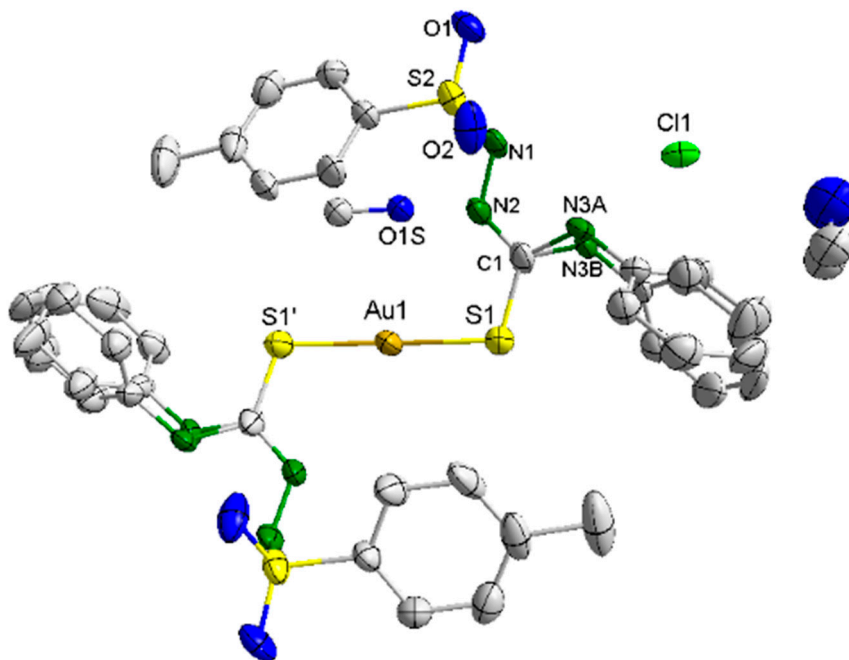

**Figure S4.6** - - Hydrogen bonds involved in the crystalline structure of the **Au2** complex. Intermolecular hydrogen bonds:  $[\text{N}(1)\cdots\text{Cl}(1) = 3.173(4) \text{ \AA}$ ,  $\text{N}(1)\text{-H}(1)\cdots\text{Cl}(1) = 113.8^\circ$ ],  $[\text{O}(1\text{S})\cdots\text{Cl}(1) = 3.135(5) \text{ \AA}$ ,  $\text{O}(1\text{S})\text{-H}(1\text{S})\cdots\text{Cl}(1) = 152.4^\circ$ ],  $[\text{N}(3\text{A})\cdots\text{O}(1) = 2.775(14) \text{ \AA}$ ,  $\text{N}(3\text{A})\text{-H}(3\text{A})\cdots\text{O}(1) = 146.1^\circ$ ],  $[\text{N}(3\text{B})\cdots\text{O}(1) = 3.149(14) \text{ \AA}$ ,  $\text{N}(3\text{B})\text{-H}(3\text{B})\cdots\text{O}(1) = 136.9^\circ$ ]. Intramolecular hydrogen bonding:  $[\text{N}(2)\cdots\text{O}(1\text{S}) = 2.905(5) \text{ \AA}$ ,  $\text{N}(2)\text{-H}(2)\cdots\text{O}(1\text{S}) = 135.6^\circ$ ]. Symmetry operations used (')  $-x, +y, -z$ . Blue dotted lines (between donor and acceptor atoms) represent hydrogen bonds.

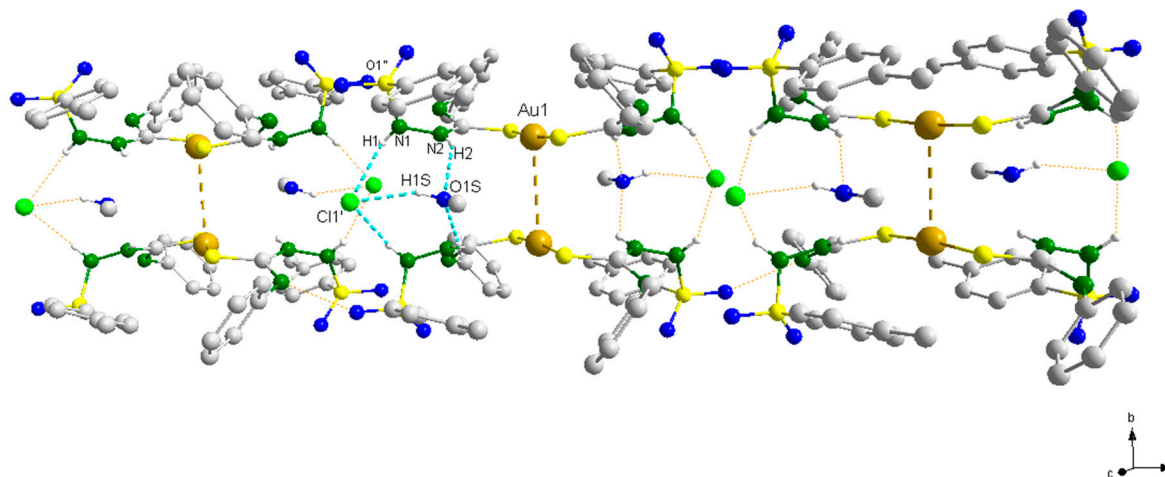

**Figure S5.1** - Electronic spectra of **Ag3** (green line), **Ag4** (orange line), **Ag5** (red line) and **Ag6** (purple line) in the 210 to 350 nm range ( $10^{-6}$  M  $\text{CH}_3\text{CN}$  solution).

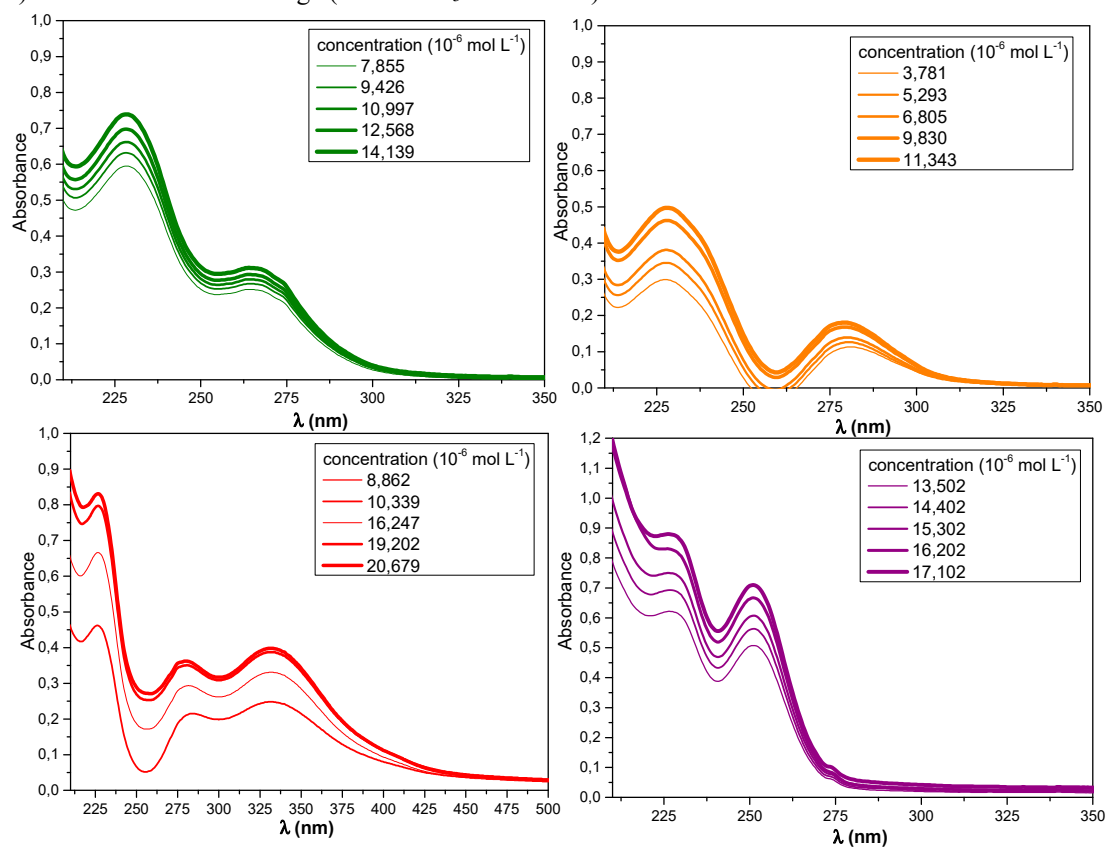

**Figure S5.2** – Electronic spectra of **Au1** (blue line), **Au2** (pink line), **Au3** (green line), **Au4** (orange line), **Au5** (red line) and **Au6** (purple line) in the 210 to 350 nm range ( $10^{-6}$  M  $\text{CH}_3\text{OH}$  solution for **Au1**, **Au2**, **Au3**, **Au6** and  $10^{-6}$  M solution  $\text{CH}_3\text{CN}$  for **Au4** and **Au5**).

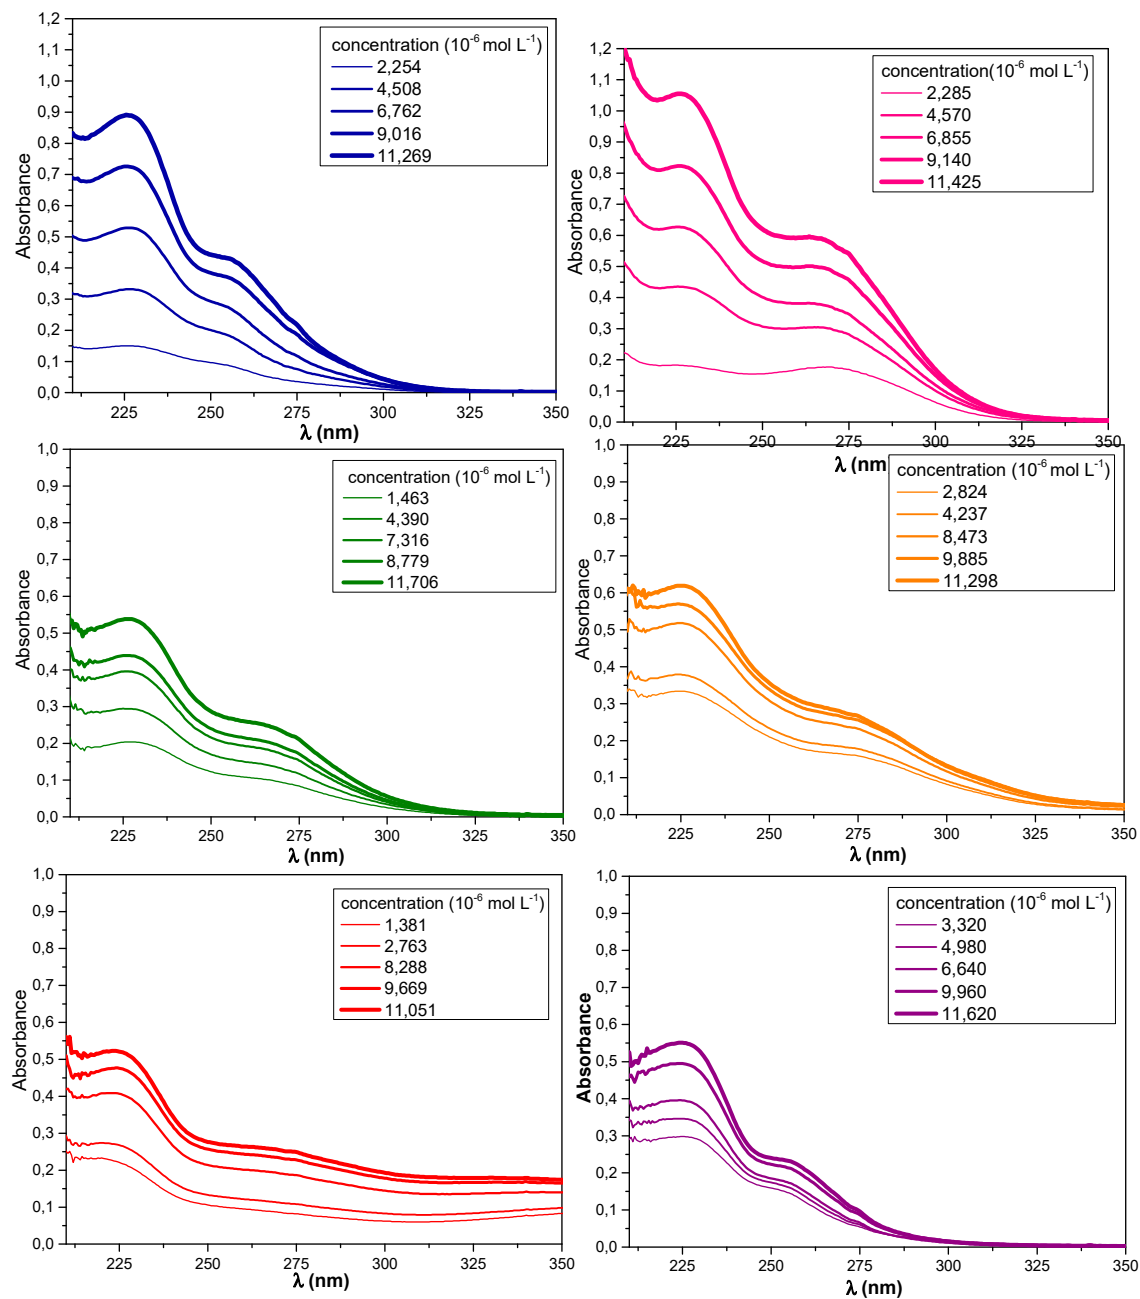

**Figure S5.32** – Linear regression for **Ag3** (green line), **Ag4** (orange line), **Ag5** (red line) and **Ag6** (purple line).

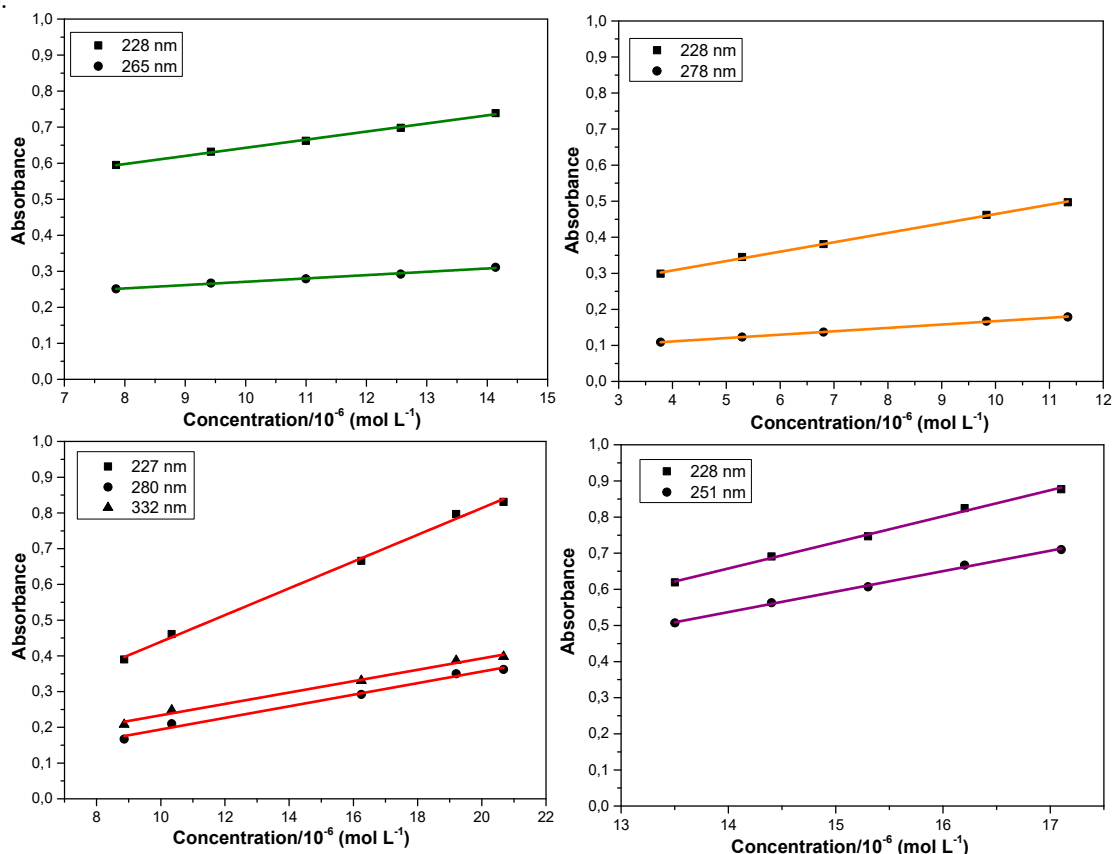

**Table S2** – Electronic spectra data obtained for the **Ag3** and **Ag4** complexes.

| <b>Ag3 complex</b>                                            |                        |                        | <b>Ag4 complex</b>                                            |                        |                        |
|---------------------------------------------------------------|------------------------|------------------------|---------------------------------------------------------------|------------------------|------------------------|
| <b>Concentration<br/>(10<sup>-6</sup> mol L<sup>-1</sup>)</b> | <b>A<sub>228</sub></b> | <b>A<sub>265</sub></b> | <b>Concentration<br/>(10<sup>-6</sup> mol L<sup>-1</sup>)</b> | <b>A<sub>228</sub></b> | <b>A<sub>278</sub></b> |
| 7.855                                                         | 0.595                  | 0.251                  | 3.781                                                         | 0.299                  | 0.109                  |
| 9.426                                                         | 0.632                  | 0.267                  | 5.293                                                         | 0.345                  | 0.123                  |
| 10.997                                                        | 0.662                  | 0.279                  | 6.805                                                         | 0.381                  | 0.137                  |
| 12.568                                                        | 0.698                  | 0.292                  | 9.830                                                         | 0.462                  | 0.167                  |
| 14.139                                                        | 0.739                  | 0.311                  | 11.343                                                        | 0.497                  | 0.179                  |

**Table S3** - Electronic spectra data obtained for the **Ag5** and **Ag6** complexes.

| <b>Ag5 complex</b>                                            |                        |                        |                        | <b>Ag6 complex</b>                                            |                        |                        |
|---------------------------------------------------------------|------------------------|------------------------|------------------------|---------------------------------------------------------------|------------------------|------------------------|
| <b>Concentration<br/>(10<sup>-6</sup> mol L<sup>-1</sup>)</b> | <b>A<sub>227</sub></b> | <b>A<sub>265</sub></b> | <b>A<sub>332</sub></b> | <b>Concentration<br/>(10<sup>-6</sup> mol L<sup>-1</sup>)</b> | <b>A<sub>228</sub></b> | <b>A<sub>251</sub></b> |
| 8.862                                                         | 0.390                  | 0.167                  | 0.208                  | 13.502                                                        | 0.619                  | 0.507                  |
| 10.339                                                        | 0.461                  | 0.210                  | 0.248                  | 14.402                                                        | 0.691                  | 0.563                  |
| 16.247                                                        | 0.666                  | 0.292                  | 0.331                  | 15.302                                                        | 0.747                  | 0.607                  |
| 19.202                                                        | 0.797                  | 0.350                  | 0.387                  | 16.202                                                        | 0.825                  | 0.667                  |
| 20.679                                                        | 0.831                  | 0.362                  | 0.398                  | 17.102                                                        | 0.877                  | 0.71                   |

**Figure S5.33**– Linear regression for **Au1** (blue line), **Au2** (pink line), **Au3** (green line), **Au4** (orange line), **Au5** (red line) and **Au6** (purple line).

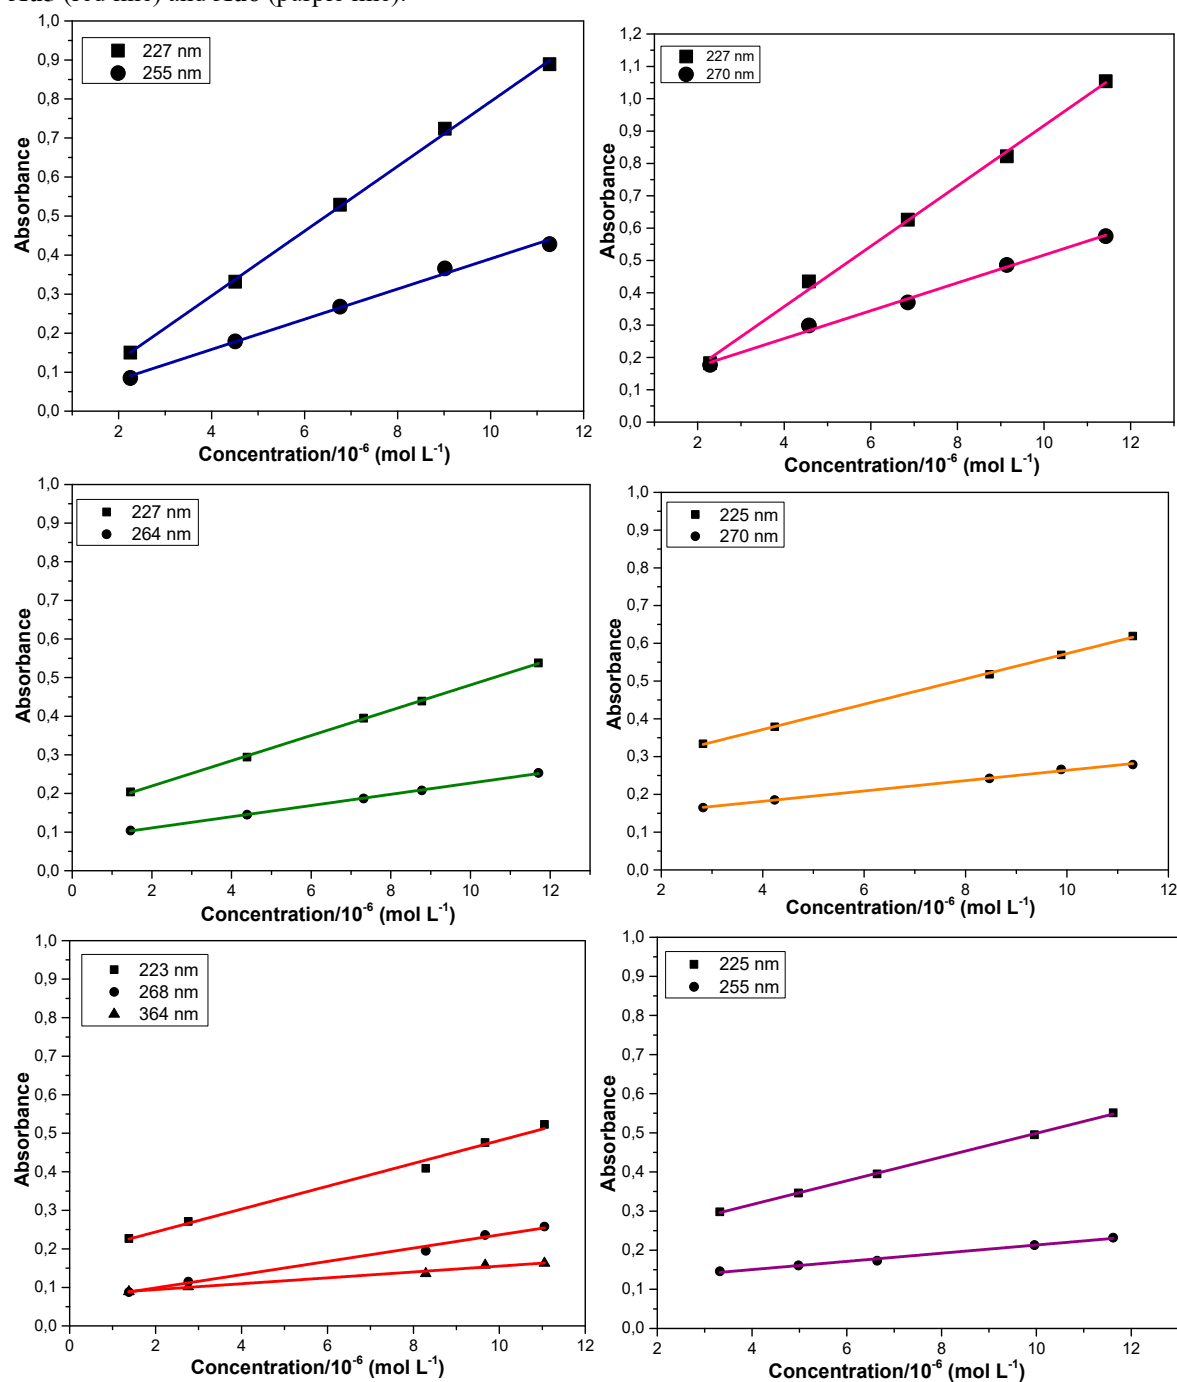

**Table S4** - Electronic spectra data obtained for the **Au1** and **Au2** complexes.

| <b>Au1 complex</b>                                            |                        |                        | <b>Au2 complex</b>                                            |                        |                        |
|---------------------------------------------------------------|------------------------|------------------------|---------------------------------------------------------------|------------------------|------------------------|
| <b>Concentration<br/>(10<sup>-6</sup> mol L<sup>-1</sup>)</b> | <b>A<sub>227</sub></b> | <b>A<sub>255</sub></b> | <b>Concentration<br/>(10<sup>-6</sup> mol L<sup>-1</sup>)</b> | <b>A<sub>227</sub></b> | <b>A<sub>270</sub></b> |
| 2.254                                                         | 0.150                  | 0.085                  | 2.285                                                         | 0.182                  | 0.177                  |
| 4.508                                                         | 0.332                  | 0.179                  | 4.570                                                         | 0.435                  | 0.299                  |
| 6.762                                                         | 0.529                  | 0.268                  | 6.855                                                         | 0.626                  | 0.370                  |
| 9.016                                                         | 0.724                  | 0.366                  | 9.140                                                         | 0.822                  | 0.486                  |
| 11.269                                                        | 0.889                  | 0.428                  | 11.425                                                        | 1.054                  | 0.575                  |

**Table S5-** Electronic spectra data obtained for the **Au3** and **Au4** complexes.

| <b>Au3 complex</b>                                            |                        |                        | <b>Au4 complex</b>                                            |                        |                        |
|---------------------------------------------------------------|------------------------|------------------------|---------------------------------------------------------------|------------------------|------------------------|
| <b>Concentration<br/>(10<sup>-6</sup> mol L<sup>-1</sup>)</b> | <b>A<sub>227</sub></b> | <b>A<sub>264</sub></b> | <b>Concentration<br/>(10<sup>-6</sup> mol L<sup>-1</sup>)</b> | <b>A<sub>225</sub></b> | <b>A<sub>270</sub></b> |
| 1.463                                                         | 0.204                  | 0.104                  | 2.824                                                         | 0.334                  | 0.165                  |
| 4.390                                                         | 0.294                  | 0.145                  | 4.237                                                         | 0.379                  | 0.185                  |
| 7.316                                                         | 0.395                  | 0.187                  | 8.473                                                         | 0.518                  | 0.242                  |
| 8.779                                                         | 0.439                  | 0.208                  | 9.885                                                         | 0.569                  | 0.266                  |
| 11.706                                                        | 0.538                  | 0.253                  | 11.298                                                        | 0.619                  | 0.279                  |

**Table S6-** Electronic spectra data obtained for the **Au5** and **Au6** complexes.

| <b>Au5 complex</b>                                            |                        |                        |                        | <b>Au6 complex</b>                                            |                        |                        |
|---------------------------------------------------------------|------------------------|------------------------|------------------------|---------------------------------------------------------------|------------------------|------------------------|
| <b>Concentration<br/>(10<sup>-6</sup> mol L<sup>-1</sup>)</b> | <b>A<sub>223</sub></b> | <b>A<sub>268</sub></b> | <b>A<sub>364</sub></b> | <b>Concentration<br/>(10<sup>-6</sup> mol L<sup>-1</sup>)</b> | <b>A<sub>225</sub></b> | <b>A<sub>255</sub></b> |
| 1.381                                                         | 0.227                  | 0.088                  | 0.089                  | 3.320                                                         | 0.298                  | 0.146                  |
| 2.763                                                         | 0.271                  | 0.115                  | 0.102                  | 4.980                                                         | 0.346                  | 0.161                  |
| 8.288                                                         | 0.409                  | 0.195                  | 0.136                  | 6.640                                                         | 0.395                  | 0.173                  |
| 9.669                                                         | 0.476                  | 0.236                  | 0.158                  | 9.960                                                         | 0.495                  | 0.213                  |
| 11.051                                                        | 0.523                  | 0.258                  | 0.163                  | 11.620                                                        | 0.551                  | 0.232                  |

**Figure S5.5** – (a) Emission spectra of **Au1** (blue line) and **Au2** (pink line) in CH<sub>3</sub>OH at 298 K;  $\lambda_{exc}$  = 255 nm for **Au1** and 270 nm for **Au2**; (b) Emission spectra of CH<sub>3</sub>OH at 298 K;  $\lambda_{exc}$  = 250 nm.

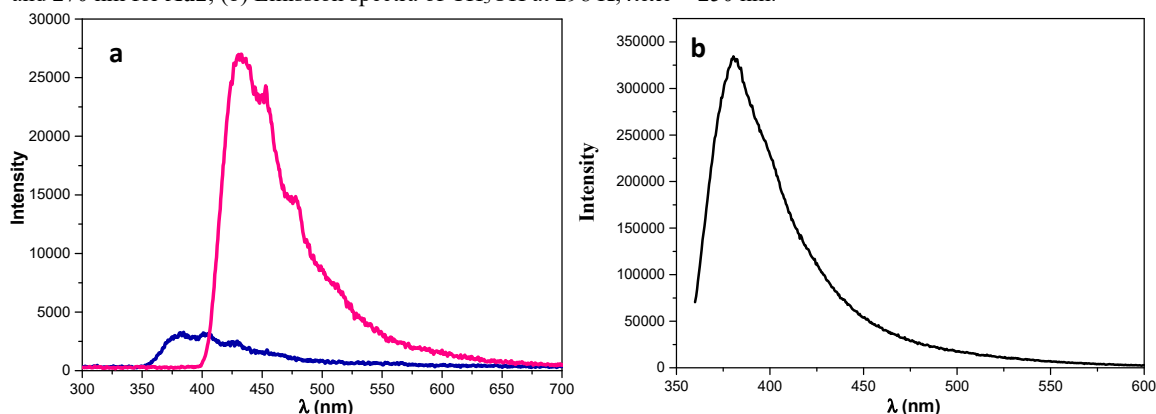

**Figure S5.6** – Emission spectra of **Au1** (blue dashed line) and **Au2** (pink dashed line) in MeOH at 77 K;  $\lambda_{exc}$  = 255 nm for **Au1** and 270 nm for **Au2**.

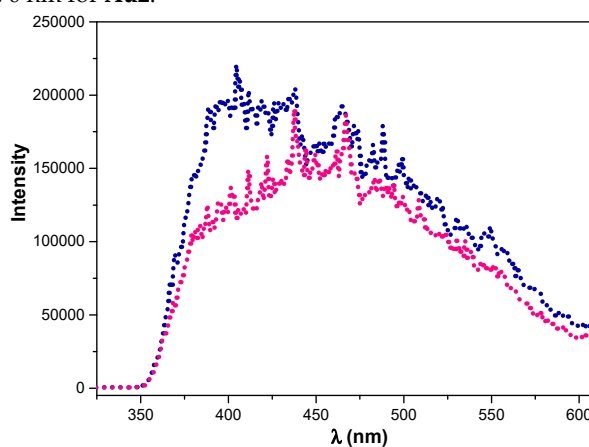



**Table S7.** Basis set functions used for gold complexes.

```
NewGTO H
S 3
1 12.98511484 0.0305015
2 1.95908134 0.2062392
3 0.44403649 0.7632592
S 1
1 0.11282695 1.0000000
P 1
1 0.80305095 1.0000000
end

NewGTO C
S 5
1 4949.46032594 0.0021254
2 758.82582124 0.0138797
3 172.62336223 0.0699682
4 47.77742113 0.2630053
5 15.15140603 0.6510212
S 2
1 5.39400345 0.7300080
2 2.11083628 0.2699919
S 1
1 0.52460137 1.0000000
S 1
1 0.15964728 1.0000000
P 4
1 18.97219923 0.0156205
2 4.18721595 0.0966388
3 1.21388239 0.3264242
4 0.38698643 0.5613164
P 1
1 0.12406489 1.0000000
D 1
1 0.61467289 1.0000000
end

NewGTO N
S 5
1 6711.76398035 0.0022301
2 1029.56088507 0.0140080
3 234.62552896 0.0699756
4 65.08616322 0.2624838
5 20.68134371 0.6513023
S 2
1 7.35948620 0.7394324
2 2.86133058 0.2605675
S 1
1 0.75772555 1.0000000
S 1
1 0.22278085 1.0000000
P 4
1 26.95312900 0.0161302
2 6.01777874 0.1007562
3 1.76062640 0.3305209
4 0.56064983 0.5525926
P 1
1 0.17525619 1.0000000
D 1
```

|   |            |           |
|---|------------|-----------|
| 1 | 0.89591019 | 1.0000000 |
|---|------------|-----------|

end

NewGTO O

|   |               |           |
|---|---------------|-----------|
| S | 5             |           |
| 1 | 8897.19445619 | 0.0023229 |
| 2 | 1365.26538810 | 0.0140091 |
| 3 | 311.21828724  | 0.0694697 |
| 4 | 86.33353862   | 0.2611441 |
| 5 | 27.42841118   | 0.6530540 |
| S | 2             |           |
| 1 | 9.74740298    | 0.7418317 |
| 2 | 3.77109950    | 0.2581682 |
| S | 1             |           |
| 1 | 1.04455407    | 1.0000000 |
| S | 1             |           |
| 1 | 0.30382295    | 1.0000000 |
| P | 4             |           |
| 1 | 34.75998468   | 0.0172481 |
| 2 | 7.80757529    | 0.1079455 |
| 3 | 2.29096903    | 0.3383584 |
| 4 | 0.71677956    | 0.5364479 |
| P | 1             |           |
| 1 | 0.21323853    | 1.0000000 |
| D | 1             |           |
| 1 | 1.25011953    | 1.0000000 |

end

NewGTO S

|   |                |            |
|---|----------------|------------|
| S | 5              |            |
| 1 | 88298.52965731 | 0.0037231  |
| 2 | 13783.75049251 | 0.0144966  |
| 3 | 3273.99080251  | 0.0569731  |
| 4 | 933.93904998   | 0.2171714  |
| 5 | 294.47682844   | 0.7076356  |
| S | 2              |            |
| 1 | 5.19930244     | 0.5076446  |
| 2 | 2.03425969     | 0.4923553  |
| S | 1              |            |
| 1 | 101.30556573   | 1.0000000  |
| S | 1              |            |
| 1 | 37.95800089    | 1.0000000  |
| S | 1              |            |
| 1 | 15.05040359    | 1.0000000  |
| S | 1              |            |
| 1 | 0.38772280     | 1.0000000  |
| S | 1              |            |
| 1 | 0.15157298     | 1.0000000  |
| P | 6              |            |
| 1 | 759.75242296   | 0.0015116  |
| 2 | 180.00565026   | 0.0113965  |
| 3 | 56.73558346    | 0.0560869  |
| 4 | 20.36270362    | 0.1849910  |
| 5 | 7.76216777     | 0.3713178  |
| 6 | 3.02062956     | 0.3746960  |
| P | 1              |            |
| 1 | 1.11706212     | -1.0000000 |
| P | 1              |            |
| 1 | 0.41415858     | 1.0000000  |
| P | 1              |            |

|           |                   |            |
|-----------|-------------------|------------|
| 1         | 0.12911675        | 1.0000000  |
| D 1       |                   |            |
| 1         | 0.47158905        | 1.0000000  |
| end       |                   |            |
| NewGTO Au |                   |            |
| S 8       |                   |            |
| 1         | 14703222.86676416 | 0.0037526  |
| 2         | 2262824.67803200  | 0.0100581  |
| 3         | 541256.94037958   | 0.0214627  |
| 4         | 164442.91034176   | 0.0419279  |
| 5         | 59155.59429110    | 0.0745368  |
| 6         | 24111.28878337    | 0.1319630  |
| 7         | 10152.24890131    | 0.2484028  |
| 8         | 4170.67168425     | 0.4678957  |
| S 3       |                   |            |
| 1         | 243.52806941      | -0.4833215 |
| 2         | 117.22573806      | -0.4189882 |
| 3         | 53.38778177       | -0.0976901 |
| S 2       |                   |            |
| 1         | 1707.43394310     | 0.5704913  |
| 2         | 708.28135147      | 0.4295086  |
| S 2       |                   |            |
| 1         | 10.72476847       | 0.5023106  |
| 2         | 4.98291235        | 0.4976893  |
| S 2       |                   |            |
| 1         | 1.37574165        | -0.7187708 |
| 2         | 0.66299967        | -0.2812291 |
| S 1       |                   |            |
| 1         | 25.23167009       | 1.0000000  |
| S 1       |                   |            |
| 1         | 0.11066351        | 1.0000000  |
| S 1       |                   |            |
| 1         | 0.03911478        | 1.0000000  |
| P 8       |                   |            |
| 1         | 57867.45693148    | 0.0025583  |
| 2         | 14466.07282046    | 0.0069902  |
| 3         | 5096.80289128     | 0.0204152  |
| 4         | 2035.23445681     | 0.0610881  |
| 5         | 842.36068729      | 0.1629640  |
| 6         | 361.46395991      | 0.3385020  |
| 7         | 161.78689265      | 0.3128406  |
| 8         | 73.04451373       | 0.0946414  |
| P 3       |                   |            |
| 1         | 16.95126547       | 0.2800147  |
| 2         | 7.89562180        | 0.4069449  |
| 3         | 3.73415826        | 0.3130403  |
| P 1       |                   |            |
| 1         | 35.18821179       | -1.0000000 |
| P 1       |                   |            |
| 1         | 1.40958119        | 1.0000000  |
| P 1       |                   |            |
| 1         | 0.52307734        | 1.0000000  |
| P 1       |                   |            |
| 1         | 0.12434867        | 1.0000000  |
| P 1       |                   |            |
| 1         | 0.03469933        | 1.0000000  |
| D 5       |                   |            |
| 1         | 1057.31409955     | 0.0149745  |
| 2         | 315.34985277      | 0.0904567  |

|     |              |            |
|-----|--------------|------------|
| 3   | 118.76210977 | 0.2923335  |
| 4   | 49.52241329  | 0.4170518  |
| 5   | 21.54470227  | 0.1851834  |
| D 2 |              |            |
| 1   | 9.19880872   | -0.7782852 |
| 2   | 3.88284809   | -0.2217147 |
| D 1 |              |            |
| 1   | 1.23471691   | 1.0000000  |
| D 1 |              |            |
| 1   | 0.35702456   | 1.0000000  |
| F 4 |              |            |
| 1   | 86.31773515  | 0.0583691  |
| 2   | 27.55700975  | 0.2444140  |
| 3   | 9.83940823   | 0.4153993  |
| 4   | 3.31580164   | 0.2818174  |
| F 1 |              |            |
| 1   | 0.84103480   | 1.0000000  |

**Table S8** - Vibrational modes and their theoretical assignments in related to the C=S bond.

| Compound                                             | Vibrational frequency / $\text{cm}^{-1}$ | Vibrational mode assignment                                                           |
|------------------------------------------------------|------------------------------------------|---------------------------------------------------------------------------------------|
| Au(HL1 <sup>Ch</sup> ) <sub>2</sub> Cl               | 790.64 / 794.59                          | $\nu\text{C}=\text{S} + \delta_{\text{oop}}\text{CH}_2(\text{ciclohexane})$           |
| Au(HL2 <sup>Ph</sup> ) <sub>2</sub> Cl               | 744.73 / 746.69                          | $\nu\text{C}=\text{S} + \delta\text{NCN} + \delta_{\text{oop}}\text{CH}_2(\text{ph})$ |
| Au(HL3 <sup>FPh</sup> ) <sub>2</sub> Cl              | 738.89 / 741.70                          | $\nu\text{C}=\text{S} + \delta\text{NCN} + \delta_{\text{oop}}\text{CH}_2(\text{ph})$ |
| Au(HL4 <sup>ClPh</sup> ) <sub>2</sub> Cl             | 767.65 / 768.30                          | $\nu\text{C}=\text{S} + \delta\text{NCN} + \delta_{\text{oop}}\text{CH}_2(\text{ph})$ |
| Au(HL5 <sup>NO<sub>2</sub>Ph</sup> ) <sub>2</sub> Cl | 755.56 / 756.37                          | $\nu\text{C}=\text{S} + \delta\text{NCN} + \delta_{\text{oop}}\text{CH}_2(\text{ph})$ |
| Au(HL6 <sup>Al</sup> ) <sub>2</sub> Cl               | 782.41 / 798.73                          | $\nu\text{C}=\text{S} + \delta\text{NCN} + \delta_{\text{roc-as}}\text{NH}$           |

**Figure S6.1** - Optimized structures of the silver complexes.

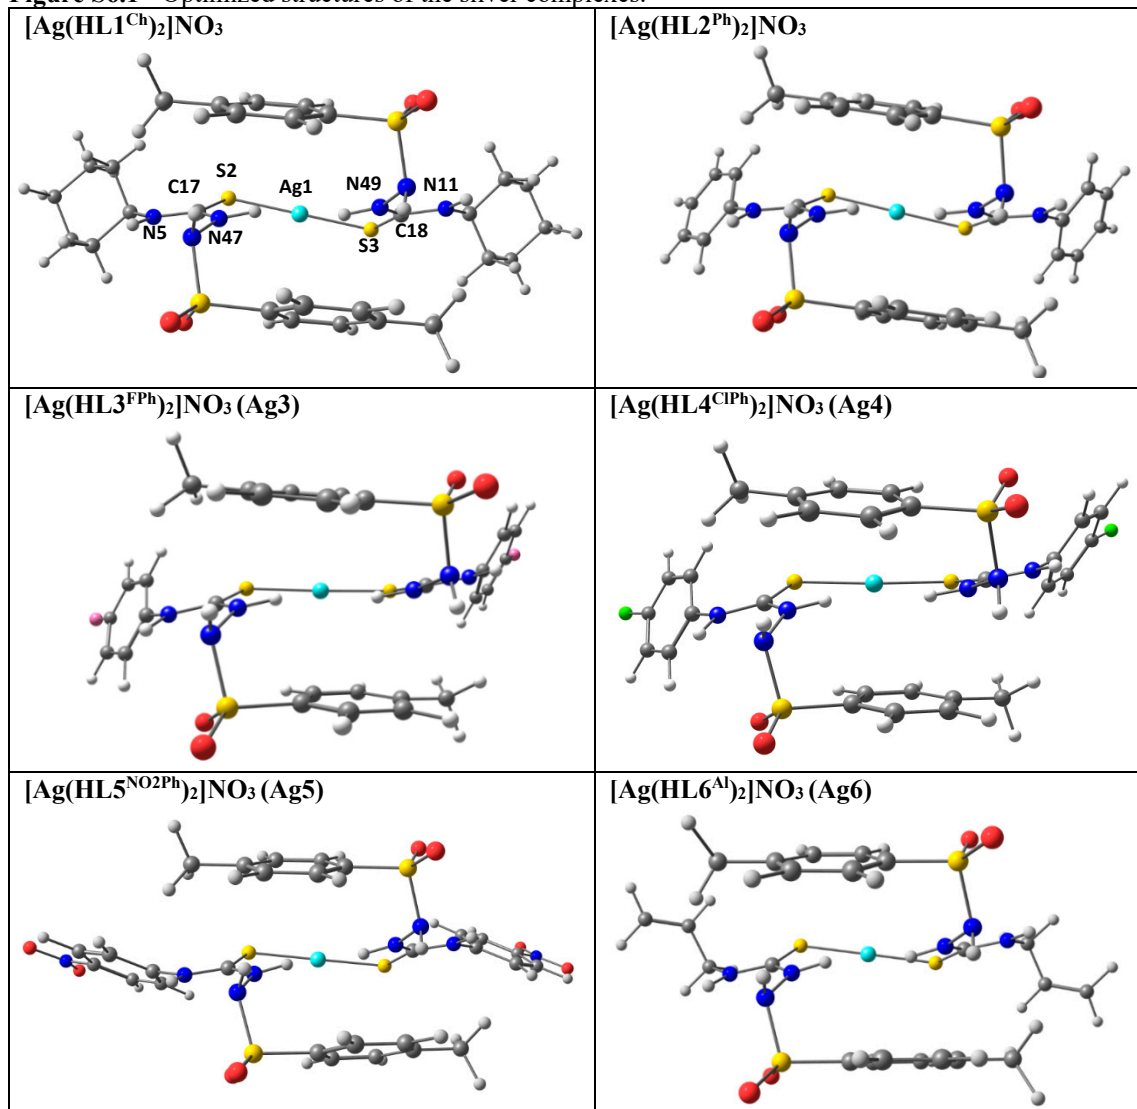

**Table S9** - Main theoretical structural data of the silver complexes.

|                               |                            | Complexes |        |        |        |        |        |
|-------------------------------|----------------------------|-----------|--------|--------|--------|--------|--------|
|                               | Atoms Selected             | Ag1       | Ag2    | Ag3    | Ag4    | Ag5    | Ag6    |
| <b>Distances/</b><br><b>Å</b> | Ag1-S3                     | 2.409     | 2.411  | 2.507  | 2.508  | 2.416  | 2.408  |
|                               | Ag1-S2                     | 2.409     | 2.408  | 2.507  | 2.508  | 2.415  | 2.411  |
| <b>Angles/°</b>               | S3-Ag1-S2                  | 172.8     | 172.7  | 164.4  | 164.0  | 175.2  | 173.4  |
|                               | Ag1-S2-C17-N <sub>5</sub>  | 17.4      | 14.2   | 11.8   | 11.7   | 13.7   | 16.8   |
| <b>DIEDRAL</b><br><b>/°</b>   | Ag1-S3-C18-N <sub>49</sub> | -162.8    | -163.8 | -168.6 | -168.2 | -169.5 | -163.0 |
|                               | Ag1-S2-C17-N <sub>47</sub> | -163.7    | -165.9 | -168.5 | -168.5 | -169.5 | -164.3 |
|                               | Ag1-S3-C18-N <sub>11</sub> | 18.3      | 16.5   | 11.8   | 12.1   | 13.7   | 18.1   |

**Figure S6.2** - Optimized structures of the gold complexes.

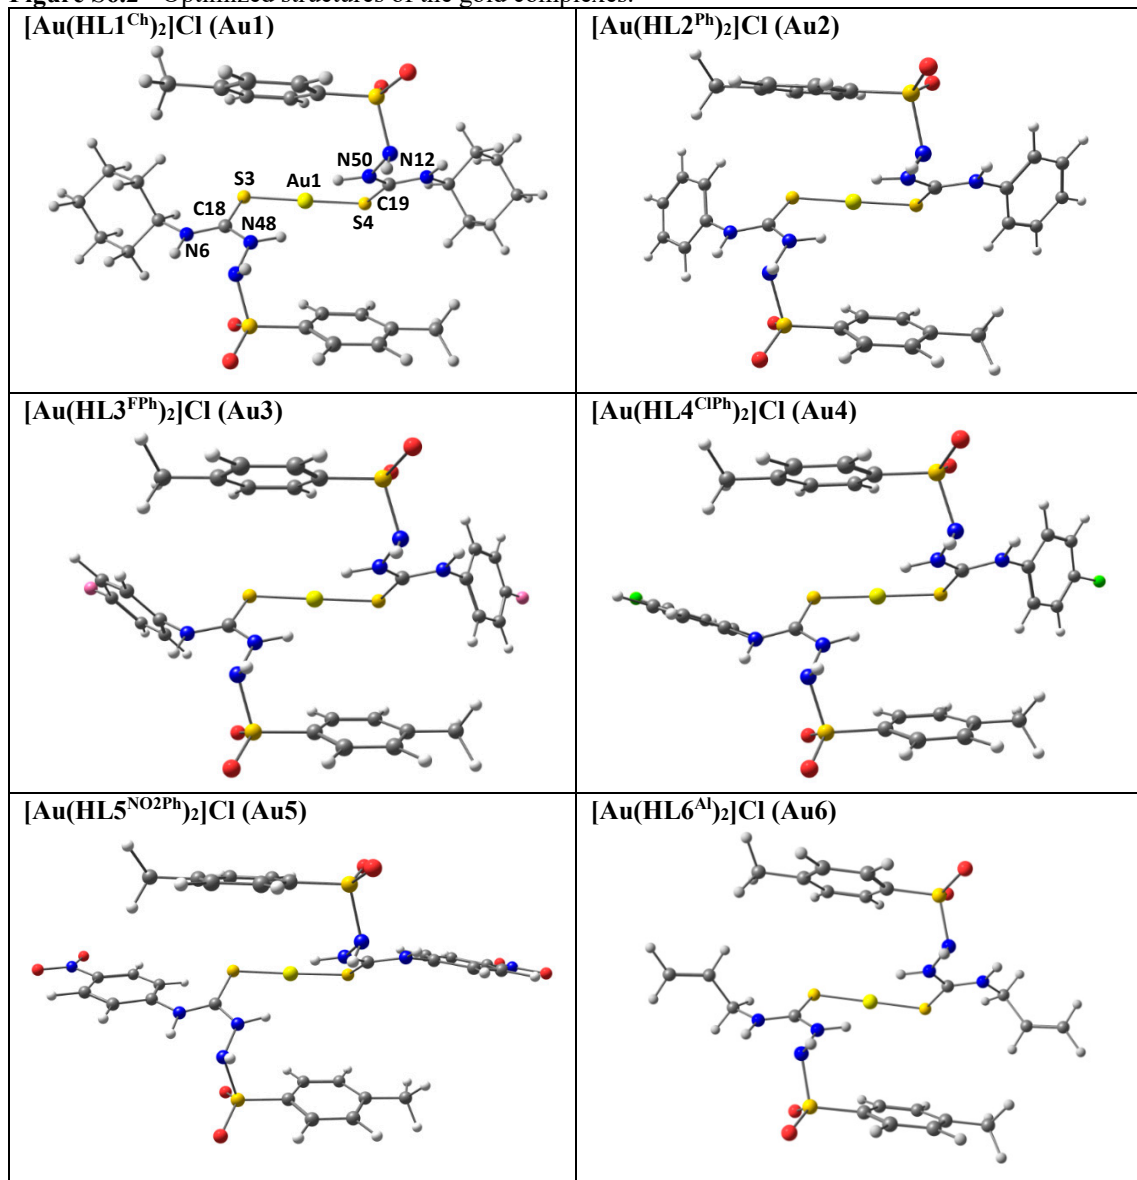

**Table S10** – Main theoretical structural data of the gold complexes.

|              |                | Complexes |        |        |        |        |        |
|--------------|----------------|-----------|--------|--------|--------|--------|--------|
|              | Atoms Selected | Au1       | Au2    | Au3    | Au4    | Au5    | Au6    |
| Distances/ Å | Au1-S4         | 2.284     | 2.289  | 2.287  | 2.287  | 2.286  | 2.284  |
|              | Au1-S3         | 2.284     | 2.289  | 2.287  | 2.287  | 2.286  | 2.284  |
| Angles/°     | S4-Au1-S3      | 174.0     | 175.0  | 174.3  | 175.0  | 175.1  | 174.8  |
|              | Au1-S4-C19-N12 | 11.1      | 15.3   | 9.2    | 6.9    | 6.2    | 8.4    |
| DIEDRAL/°    | Au1-S4-C19-N50 | -171.8    | -167.3 | -173.2 | -174.7 | -177.5 | -173.8 |
|              | Au1-S3-C18-N48 | -173.4    | -176.0 | -176.0 | -178.1 | -178.2 | -174.3 |
|              | Au1-S3-C18-N6  | 9.2       | 5.3    | 6.8    | 4.8    | 5.3    | 7.8    |

**Figure S6.3** - HOMO and LUMO orbitals in the silver complexes.

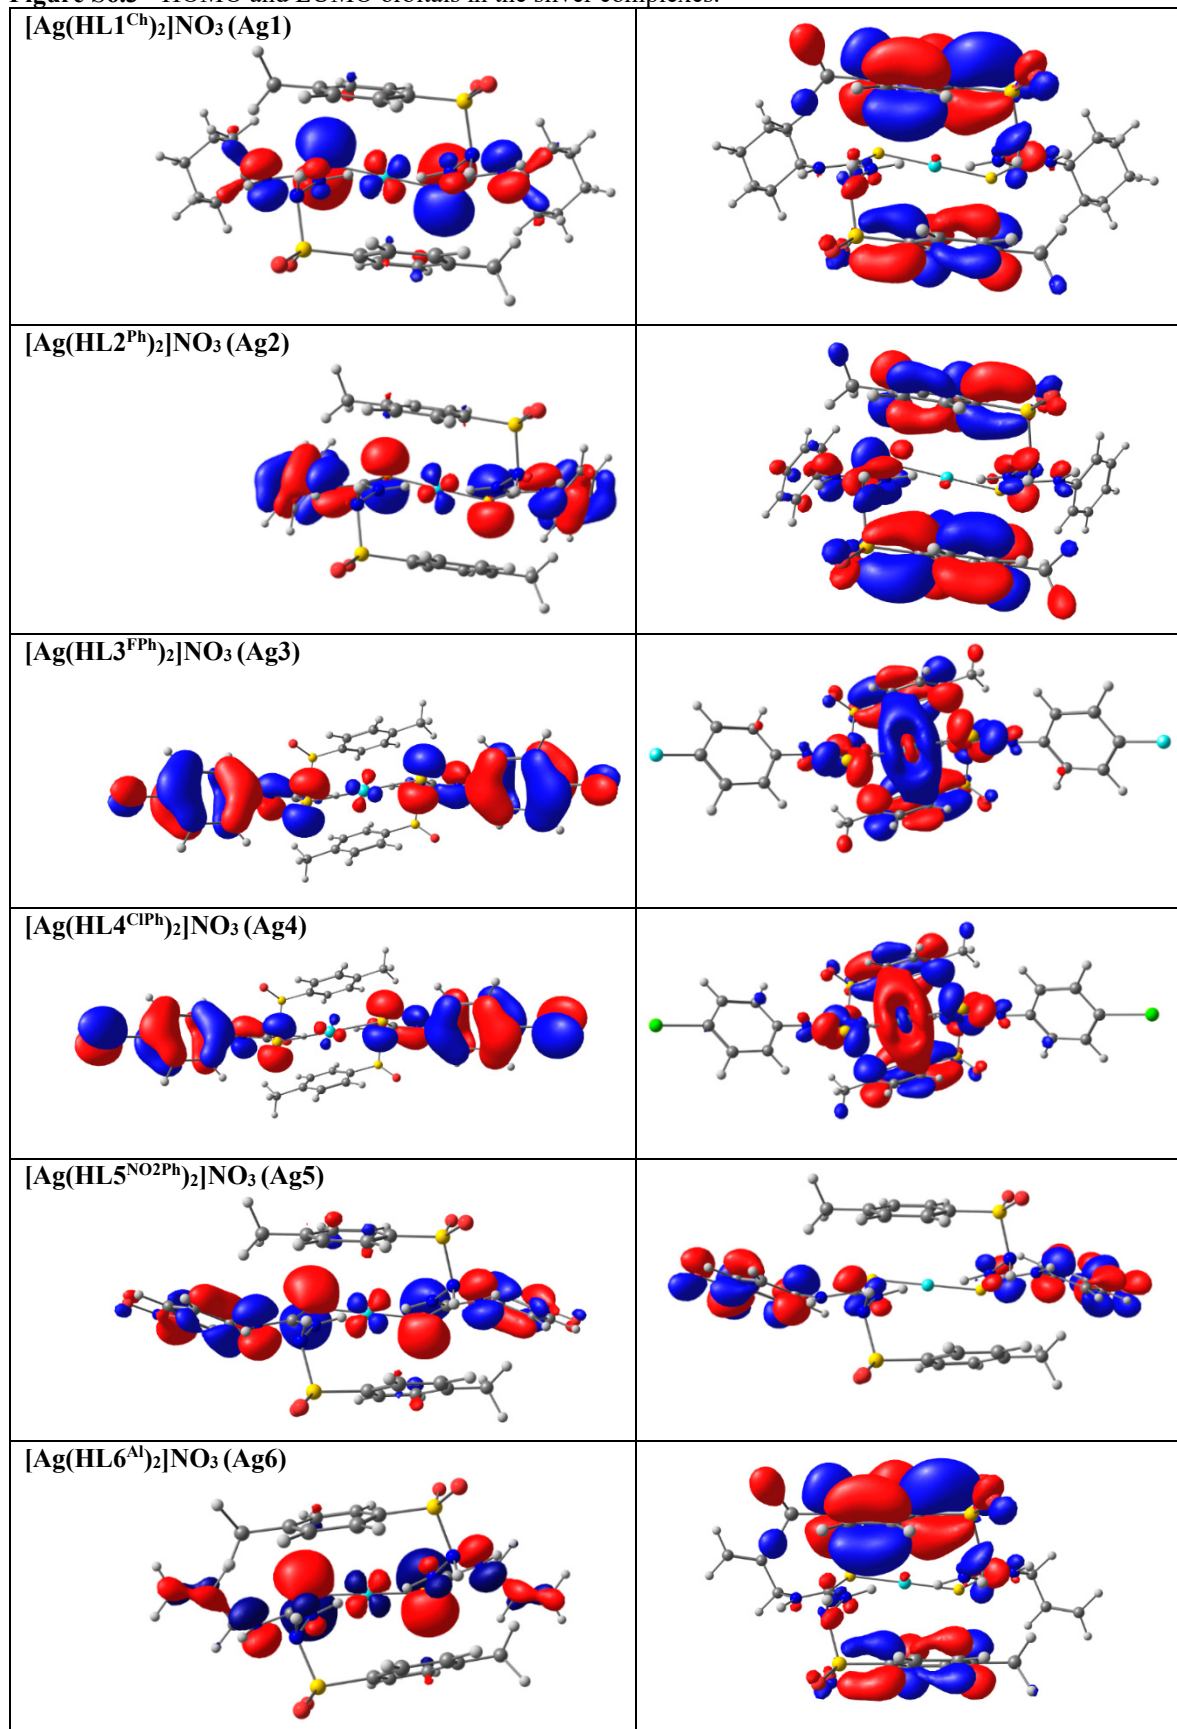

**Figure S6.4** - HOMO and LUMO orbitals in the gold complexes.

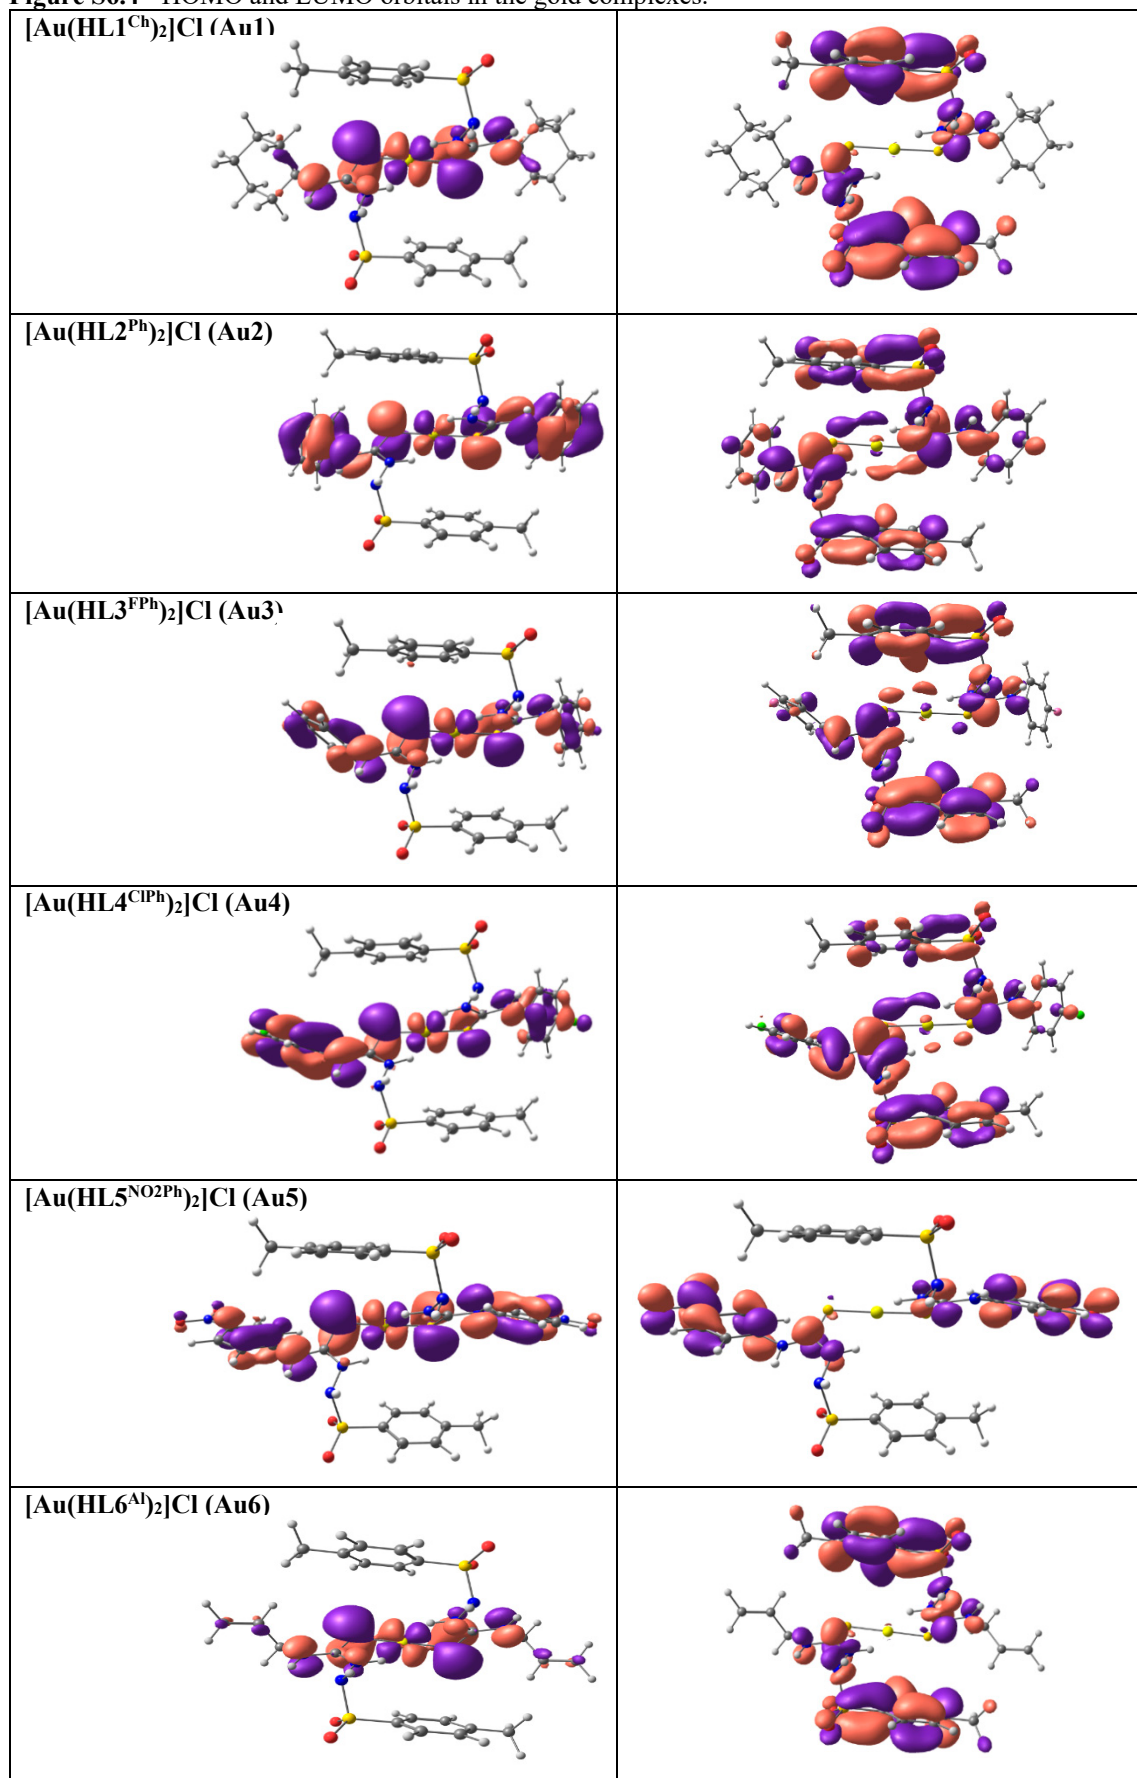



**Figure S6.5** – Optimized structure of  $[\text{Au}(\text{HL3}^{\text{FPh}})_2]^+$  (**Au3**) with the charges obtained for the AIM data.

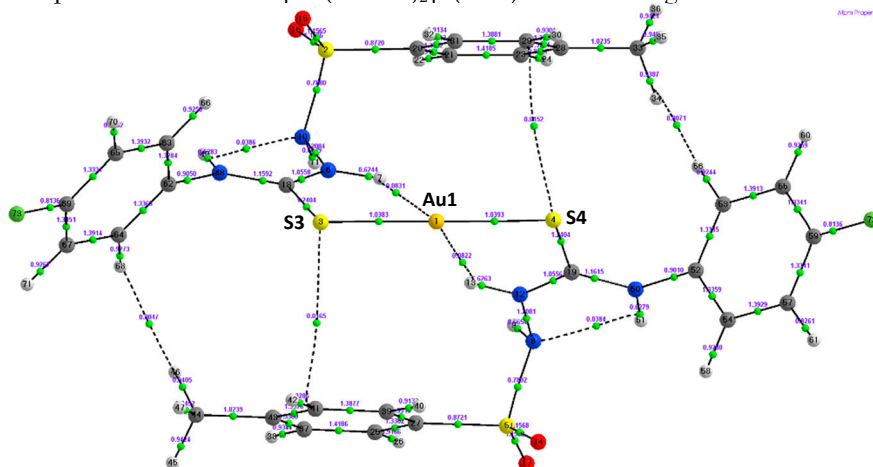

**Table S11** – Electronic properties of the gold(I) complexes. The values are shown, respectively, for each bond in the order they appear.

| $[\text{Au}(\text{HL1}^{\text{Ch}})_2]\text{Cl}$ ( <b>Au1</b> )    | q       | DI            | $\rho$          | $\nabla^2\rho$  |
|--------------------------------------------------------------------|---------|---------------|-----------------|-----------------|
| Au                                                                 | +0.1028 |               |                 |                 |
| S3                                                                 | +0.0588 |               |                 |                 |
| S4                                                                 | +0.0589 |               |                 |                 |
| S3-Au-S4                                                           |         | 1.0459/1.0463 | +0.1114/+0.1115 | +0.1698/+0.1695 |
| S3-C18                                                             |         | 1.2225        | +0.1910         | -0.2597         |
| S4-C19                                                             |         | 1.2226        | +0.1910         | -0.2593         |
| $[\text{Au}(\text{HL2}^{\text{Ph}})_2]\text{Cl}$ ( <b>Au2</b> )    | q       | DI            | $\rho$          | $\nabla^2\rho$  |
| Au                                                                 | +0.1229 |               |                 |                 |
| S3                                                                 | +0.0710 |               |                 |                 |
| S4                                                                 | +0.0661 |               |                 |                 |
| S3-Au-S4                                                           |         | 1.0344/1.0396 | +0.1104/+0.1104 | +0.1704/+0.1705 |
| S3-C18                                                             |         | 1.2346        | +0.1909         | -0.2383         |
| S4-C19                                                             |         | 1.2355        | +0.1911         | -0.2403         |
| $[\text{Au}(\text{HL3}^{\text{FPh}})_2]\text{Cl}$ ( <b>Au3</b> )   | q       | DI            | $\rho$          | $\nabla^2\rho$  |
| Au                                                                 | +0.1078 |               |                 |                 |
| S3                                                                 | +0.0912 |               |                 |                 |
| S4                                                                 | +0.0880 |               |                 |                 |
| S3-Au-S4                                                           |         | 1.0383/1.0393 | +0.1111/+0.1111 | +0.1691/+0.1686 |
| S3-C18                                                             |         | 1.2404        | +0.1917         | -0.2292         |
| S4-C19                                                             |         | 1.2404        | +0.1917         | -0.2312         |
| $[\text{Au}(\text{HL4}^{\text{ClPh}})_2]\text{Cl}$ ( <b>Au4</b> )  | q       | DI            | $\rho$          | $\nabla^2\rho$  |
| Au                                                                 | +0.1110 |               |                 |                 |
| S3                                                                 | +0.0994 |               |                 |                 |
| S4                                                                 | +0.0946 |               |                 |                 |
| S3-Au-S4                                                           |         | 1.0350/1.0367 | +0.1110/+0.1110 | +0.1690/+0.1686 |
| S3-C18                                                             |         | 1.2446        | +0.1915         | -0.2251         |
| S4-C19                                                             |         | 1.2439        | +0.1916         | -0.2269         |
| $[\text{Au}(\text{HL5}^{\text{NO2Ph}})_2]\text{Cl}$ ( <b>Au5</b> ) | q       | DI            | $\rho$          | $\nabla^2\rho$  |
| Au                                                                 | +0.1255 |               |                 |                 |
| S3                                                                 | +0.1277 |               |                 |                 |
| S4                                                                 | +0.1269 |               |                 |                 |
| S3-Au-S4                                                           |         | 1.0285/1.0291 | +0.1112/+0.1112 | +0.1700/+0.1701 |
| S3-C18                                                             |         | 1.2611        | +0.1925         | -0.2081         |
| S4-C19                                                             |         | 1.2605        | +0.1925         | -0.2093         |
| $[\text{Au}(\text{HL6}^{\text{Al}})_2]\text{Cl}$ ( <b>Au6</b> )    | q       | DI            | $\rho$          | $\nabla^2\rho$  |
| Au                                                                 | +0.1078 |               |                 |                 |
| S3                                                                 | +0.0610 |               |                 |                 |
| S4                                                                 | +0.0606 |               |                 |                 |
| S3-Au-S4                                                           |         | 1.0432/1.0441 | +0.1113/+0.1114 | +0.1702/+0.1702 |
| S3-C18                                                             |         | 1.2238        | +0.1906         | -0.2545         |
| S4-C19                                                             |         | 1.2236        | +0.1907         | -0.2553         |

Figure S7.1 – Graph of the viability versus concentrations ( $\mu\text{M}$ ) of the compounds.

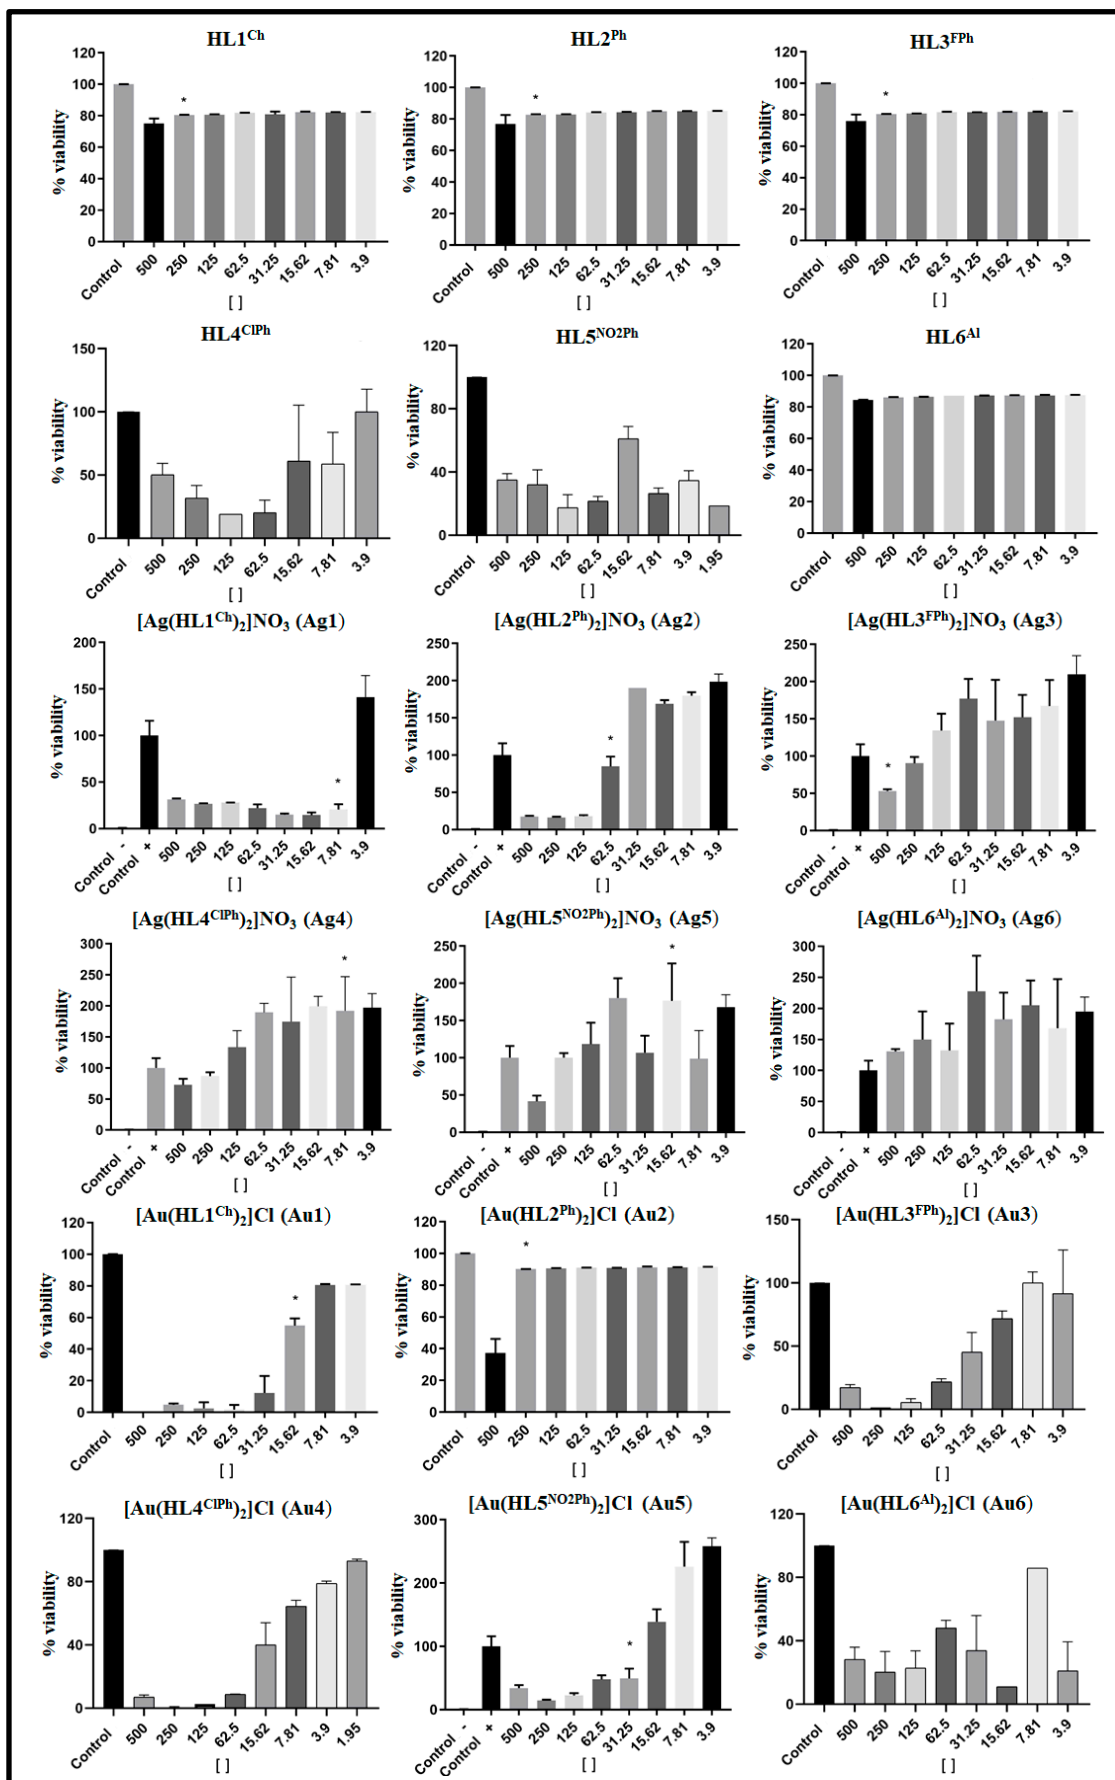

**Figure S7.2** – Leishmanicidal activity against to the *Leishmania infantum* parasite by concentrations of the compound. Blue curve represents the reference leishmanicidal drug, Glucantime. Black curve represents each compound.

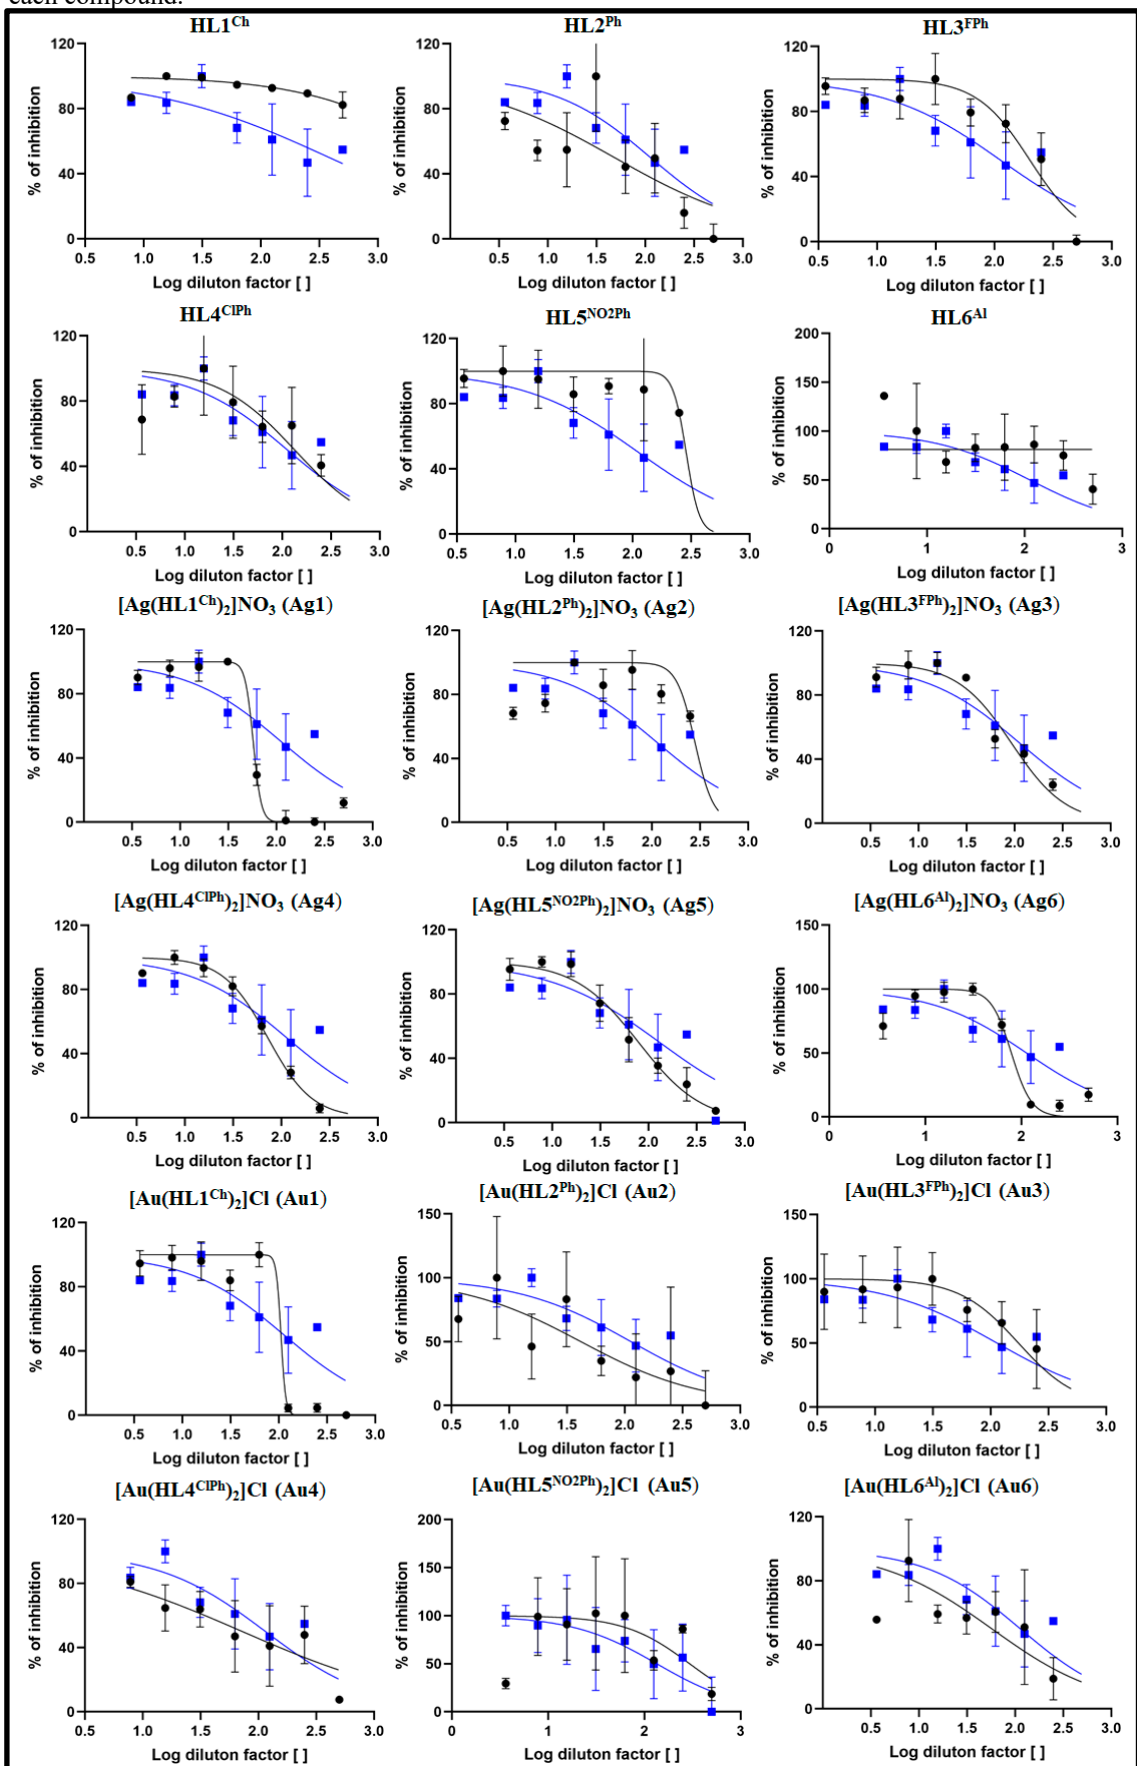

**Figure S7.3** – Leishmanicidal activity against the *Leishmania braziliensis* parasite by concentrations of the compound. Blue curve represents the reference leishmanicidal drug, Glucantime. Black curve represents each compound.

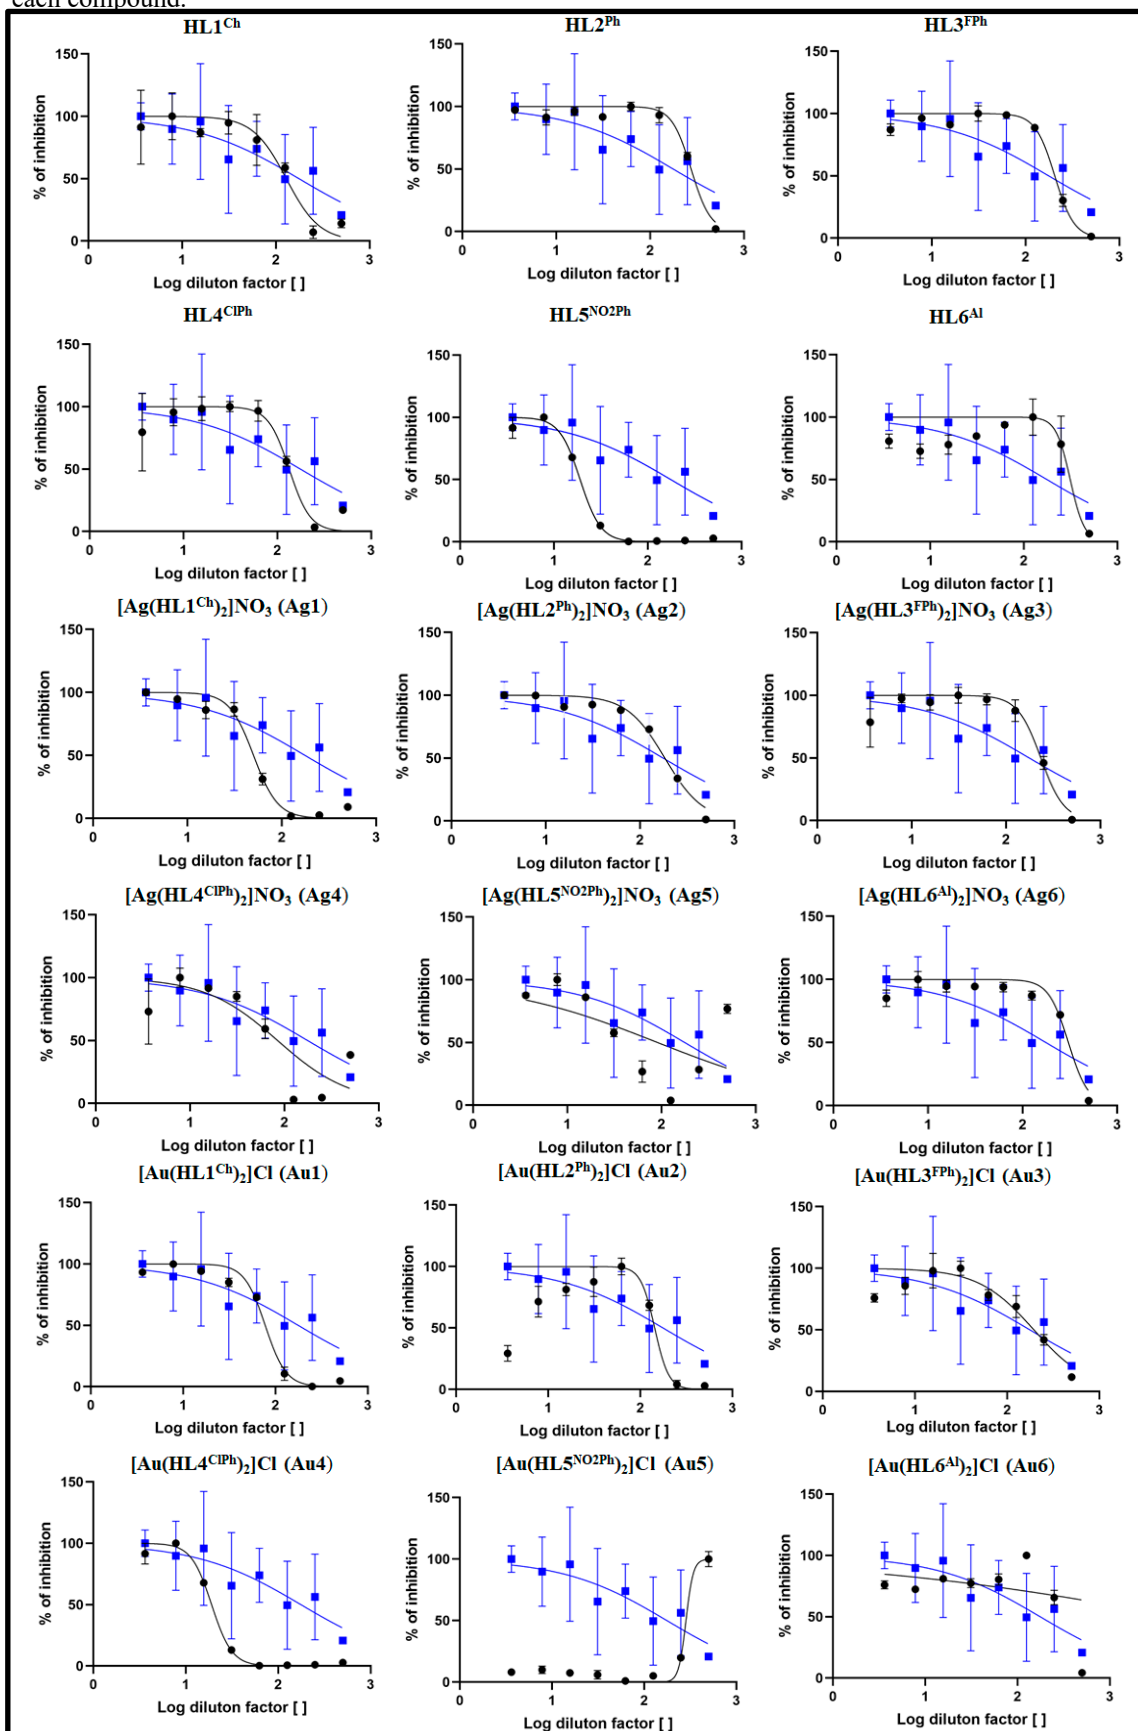

**Figure S7.4** – (a) percentage of the number of infected in 200 macrophages by *Leishmania infantum*; (b) percentage of leishmaniasis that infect 100 cells/macrophages; (c) average percentage of leishmaniasis that infect 200 cells/macrophages; of the selected compounds.

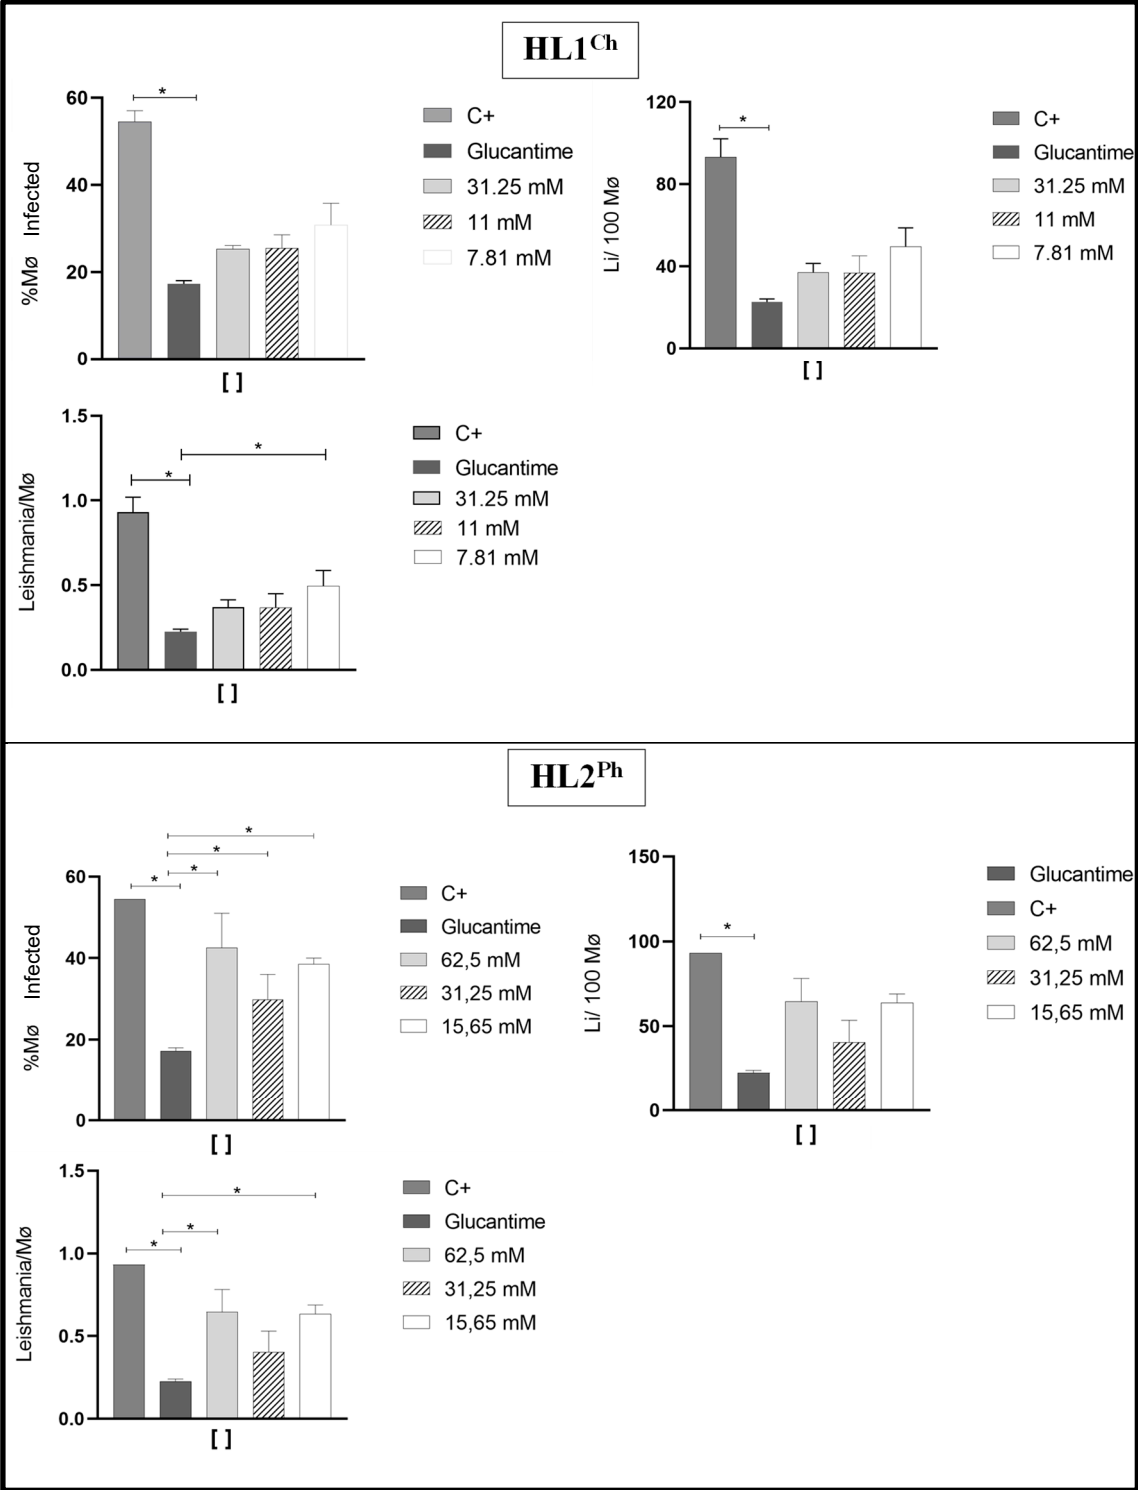

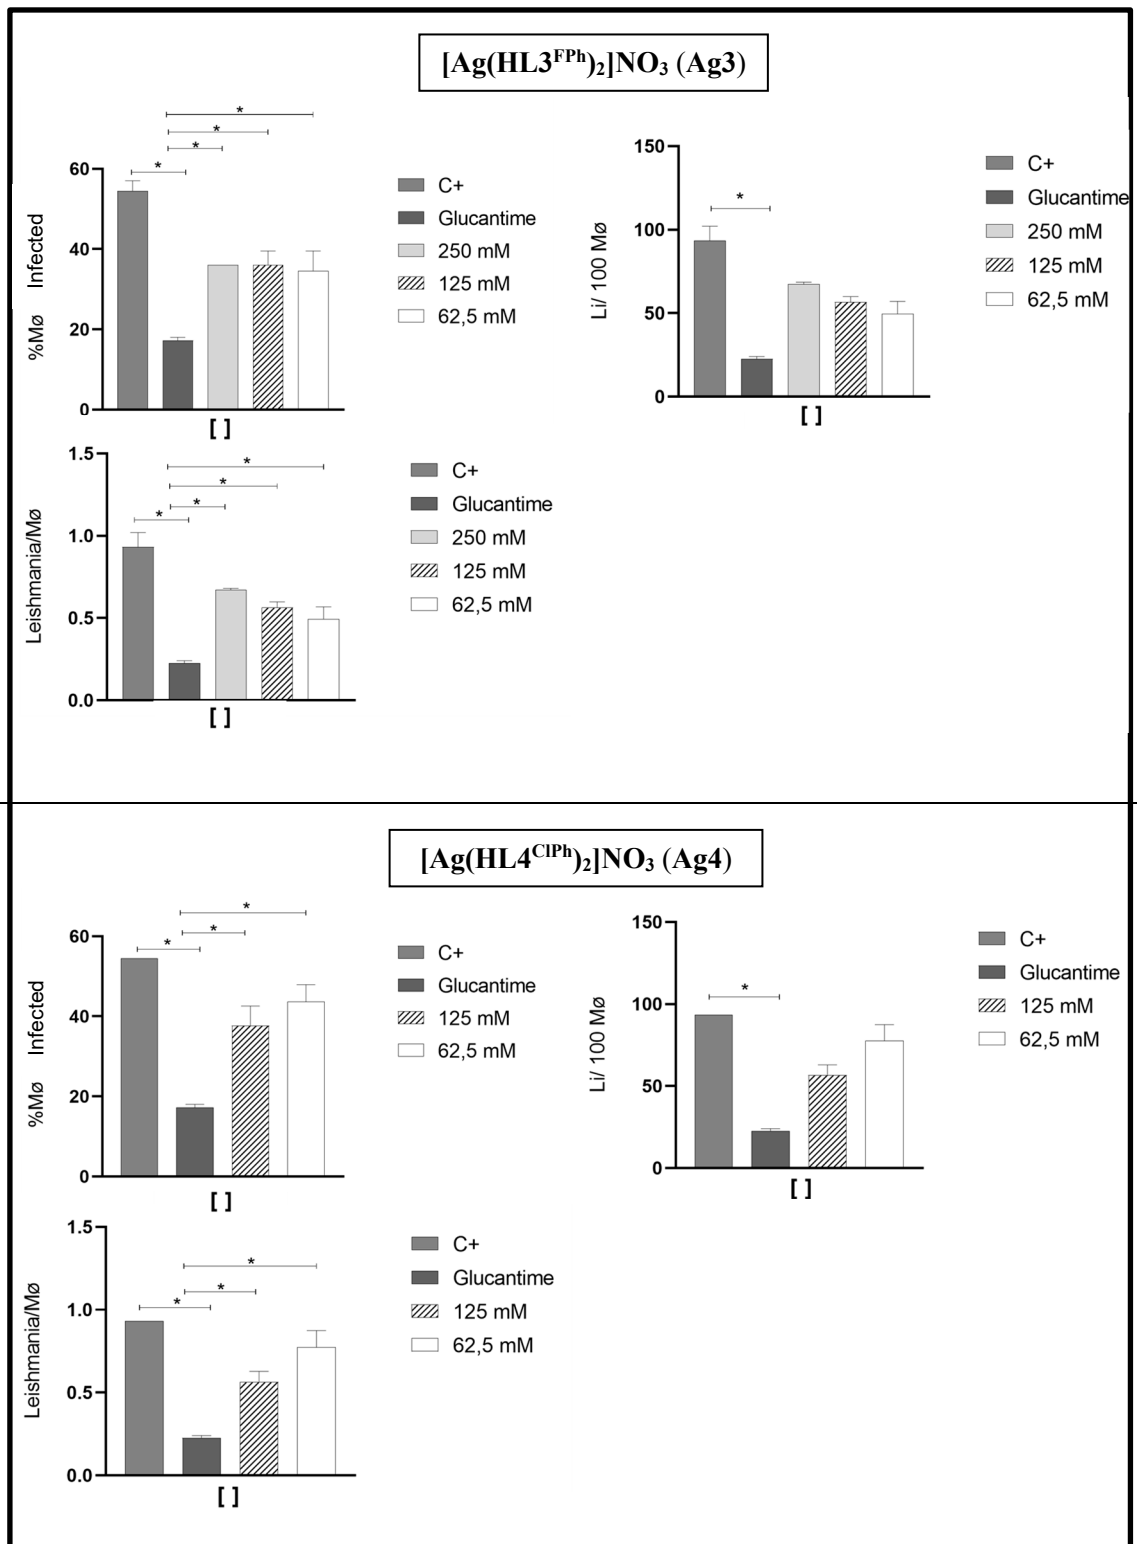

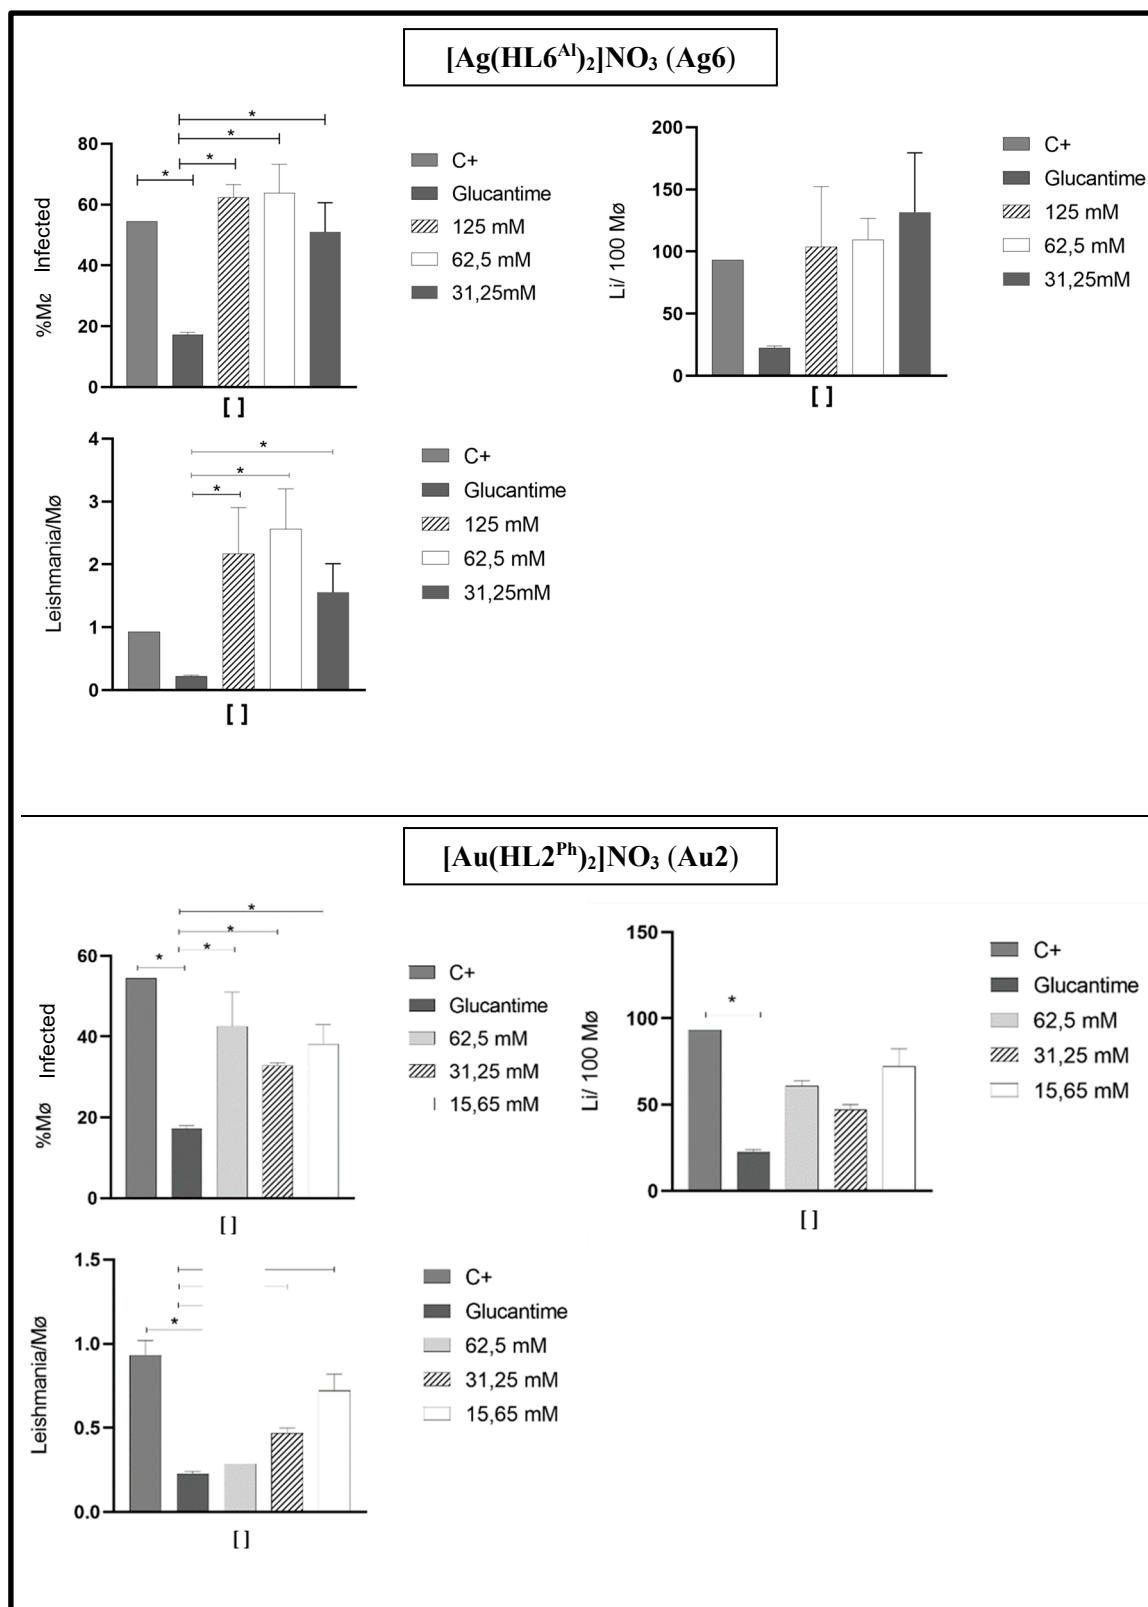

**Figure S7.5** - Image captured under a fluorescence microscope (EVOS) of Raw macrophages infected by *Leishmania infantum* after treatment with a Glucantime (leishmanicidal drug) (A) and the selected compounds;

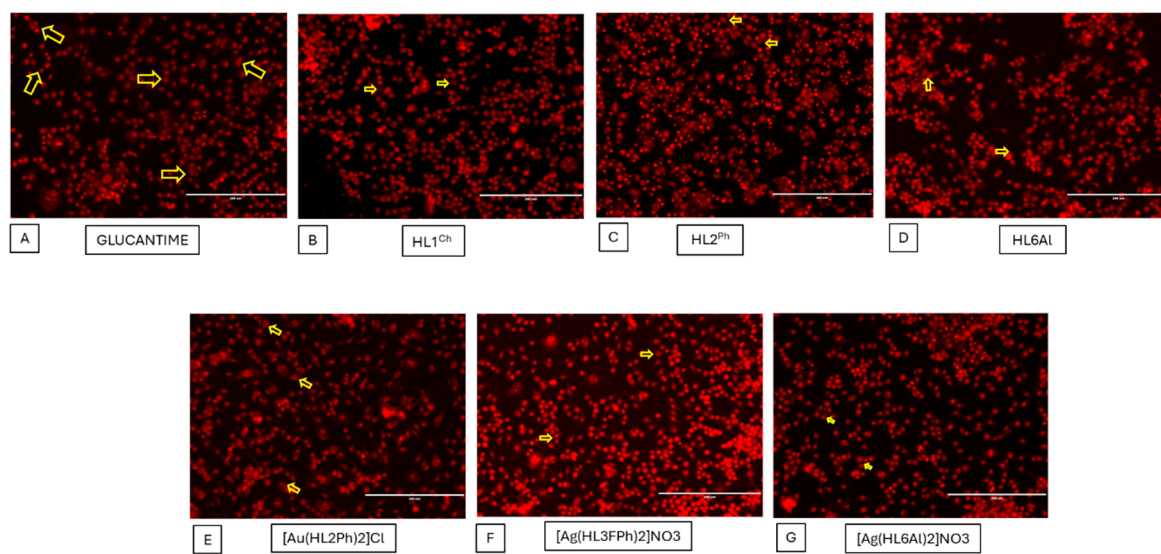



**Figure S7.6** – (A) Fluorescence emission spectra ( $\lambda_{\text{ex}} = 295 \text{ nm}$ ) of LbOYE protein in the concentration of  $1 \mu\text{mol L}^{-1}$  in the presence of increasing concentrations of the  $\text{HL5}^{\text{NO}_2\text{Ph}}$  compound. (B) Variation of maximum fluorescence intensities ( $\lambda_{\text{max}} = 333 \text{ nm}$ ) and non-linear fit to the Hill equation (Equation 1). (C) Logarithmic relationship to obtain the number of bonding sites according to Equation 2. (D) Comparison between the temperatures of 25 and 37 °C. The spectra were obtained in Tris-HCl buffer, pH 8.0; 100 mmol  $\text{L}^{-1}$  of NaCl and 2.5 % of DMSO.

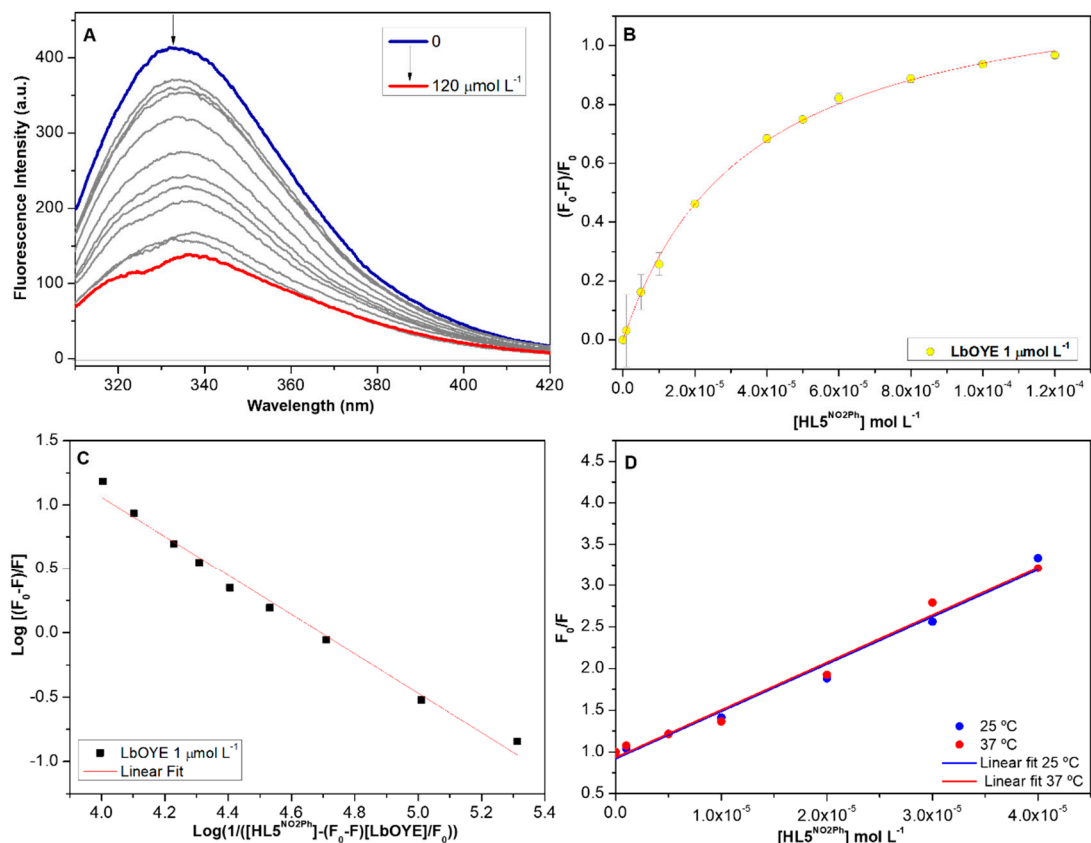

**Figure S7.7** – Fluorescence emission spectra ( $\lambda_{\text{ex}} = 295 \text{ nm}$ ) of LbOYE protein in the concentration of  $1 \mu\text{mol L}^{-1}$  in the presence of increasing concentrations of the (A)  $\text{HL1}^{\text{Ch}}$  and (B)  $\text{HL3}^{\text{FPh}}$ . The spectra were obtained in Tris-HCl buffer, pH 8.0; 100 mmol  $\text{L}^{-1}$  of NaCl and 2.5% of DMSO and 25 °C .

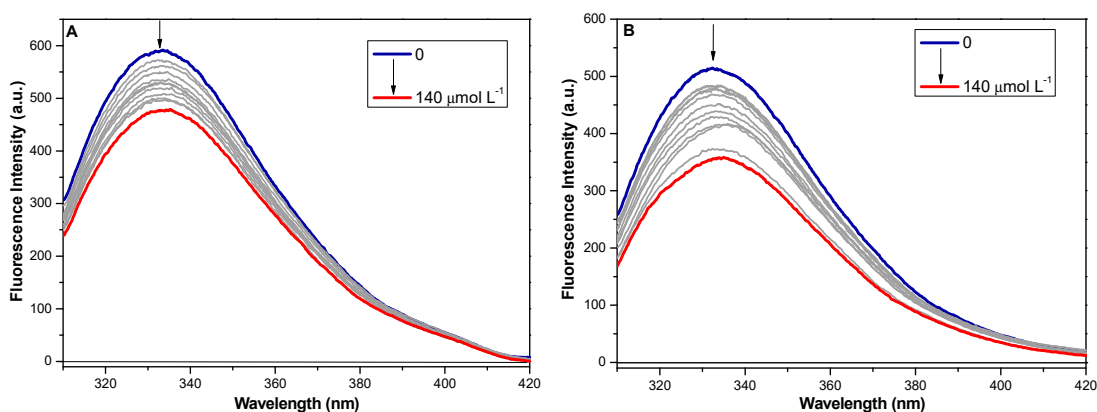

**Figure S7.8.** Fluorescence emission spectra ( $\lambda_{\text{ex}} = 295 \text{ nm}$ ) of LbOYE protein in the concentration of  $1 \mu\text{mol L}^{-1}$  in the presence of increasing concentrations of the  $[\text{Au}(\text{HL1}^{\text{Ch}})_2]\text{Cl}$  (**Au1**) complex. (B) Variation of maximum fluorescence intensities ( $\lambda_{\text{max}} = 333 \text{ nm}$ ) and non-linear fit to the Hill equation (Equation 1). (C) Logarithmic relationship to obtain the number of bonding sites according to Equation 2. (D) Comparison between the temperatures of  $25^\circ\text{C}$  and  $37^\circ\text{C}$ . The spectra were obtained in Tris-HCl buffer, pH 8.0;  $100 \text{ mmol L}^{-1}$  of NaCl and 2.5 % of DMSO.

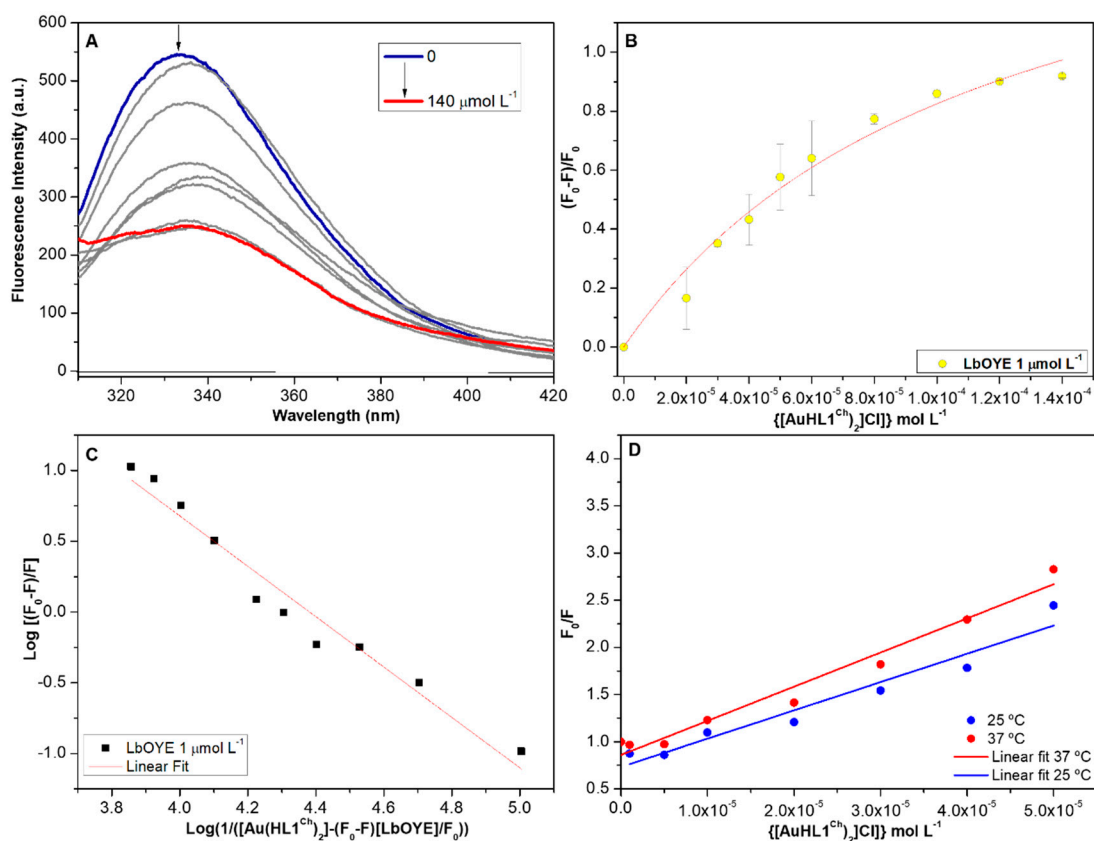

**Figure S8.1** – Representative figure of the HL1<sup>Ch</sup> ligand at the site of the OLD Yellow enzyme from *Leishmania braziliensis*.

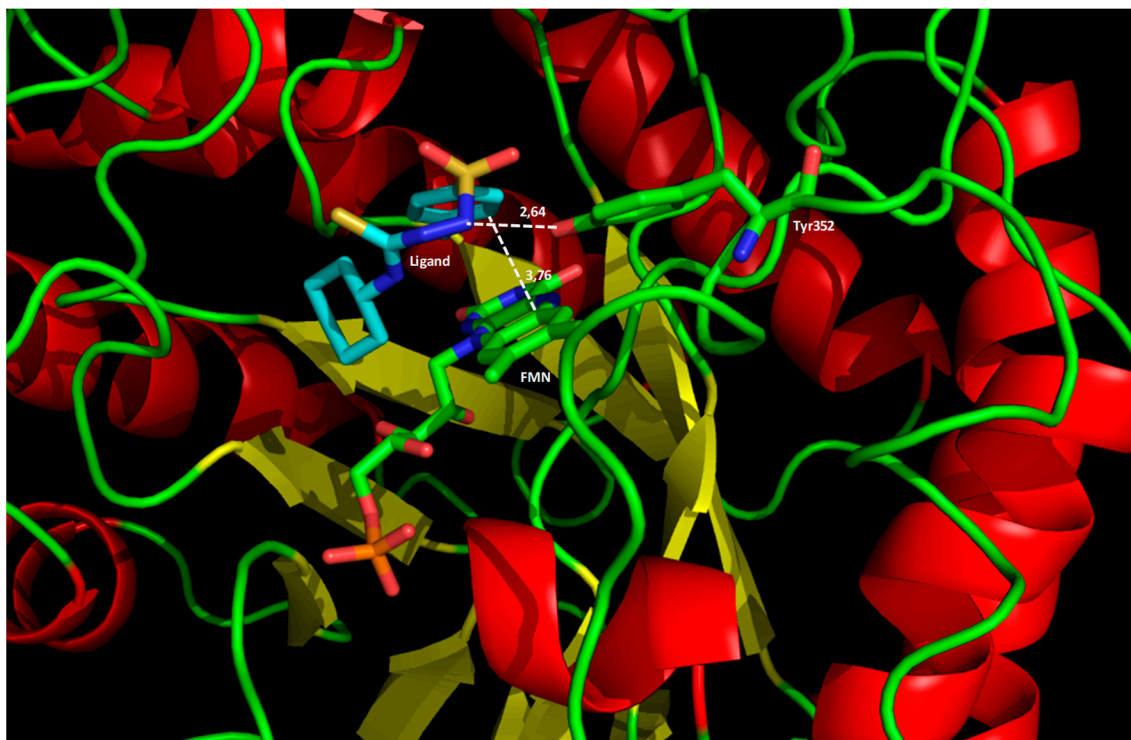

**Figure S8.2** – Representative figure of the HL3<sup>FPh</sup> ligand at the site of the OLD Yellow enzyme from *Leishmania braziliensis*.

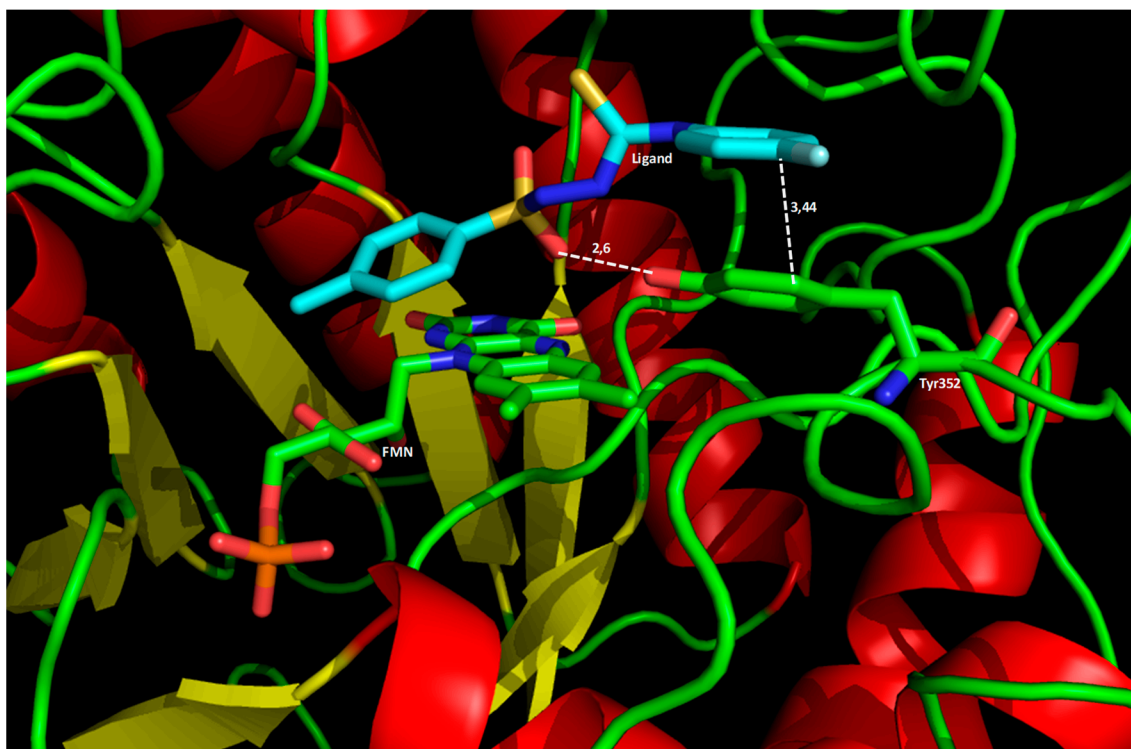

**Figure S8.34** – Representative figure of the HL4<sup>ClPh</sup> ligand at the site of the OLD Yellow enzyme from *Leishmania braziliensis*.

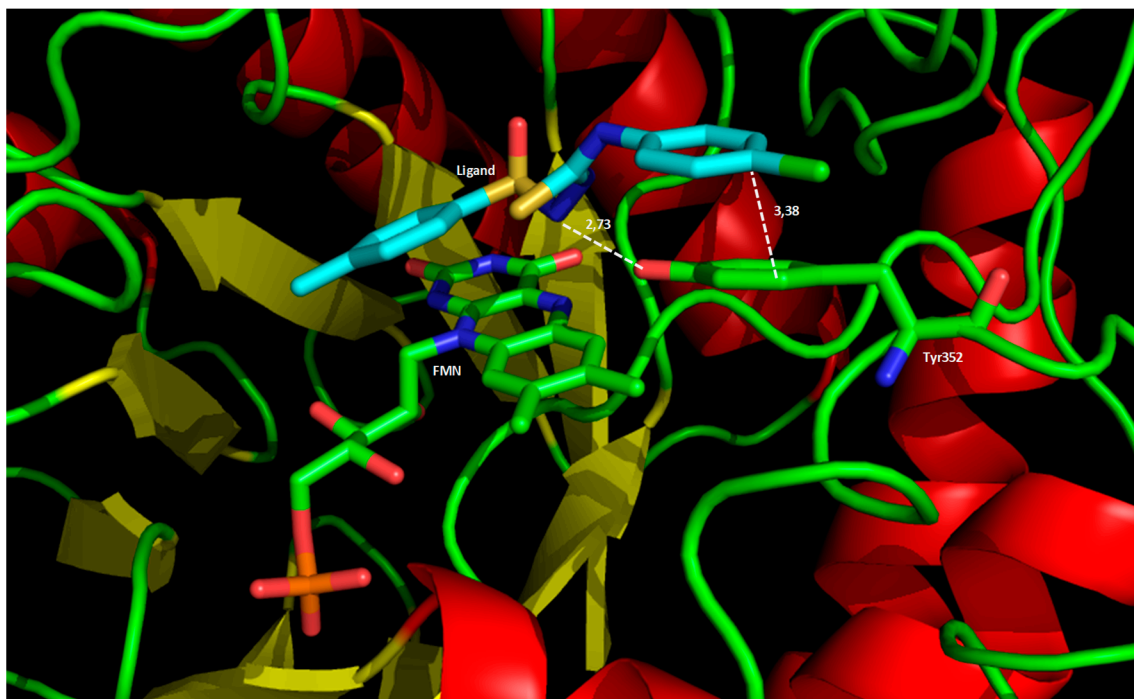

**Figure S8.35** – Representative figure of the HL5<sup>NO<sub>2</sub>Ph</sup> ligand at the site of the OLD Yellow enzyme from *Leishmania braziliensis*.

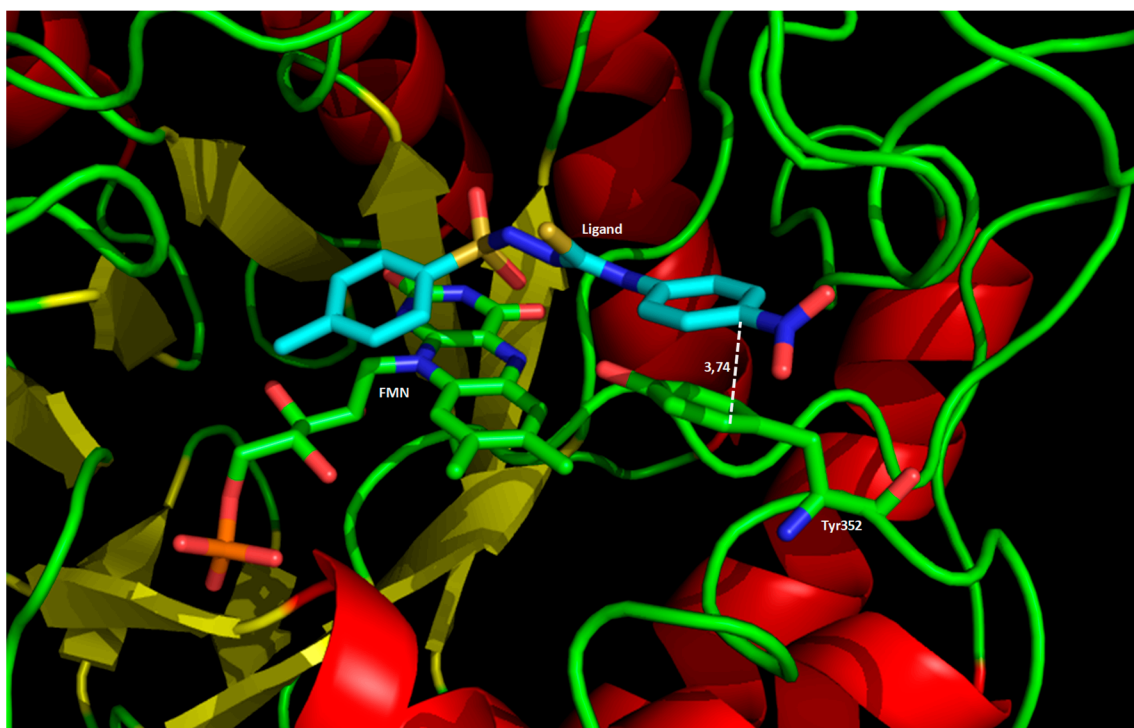

**Figure S8.36** – Representative figure of the HL6<sup>Al</sup> ligand at the site of the OLD Yellow enzyme from *Leishmania braziliensis*.

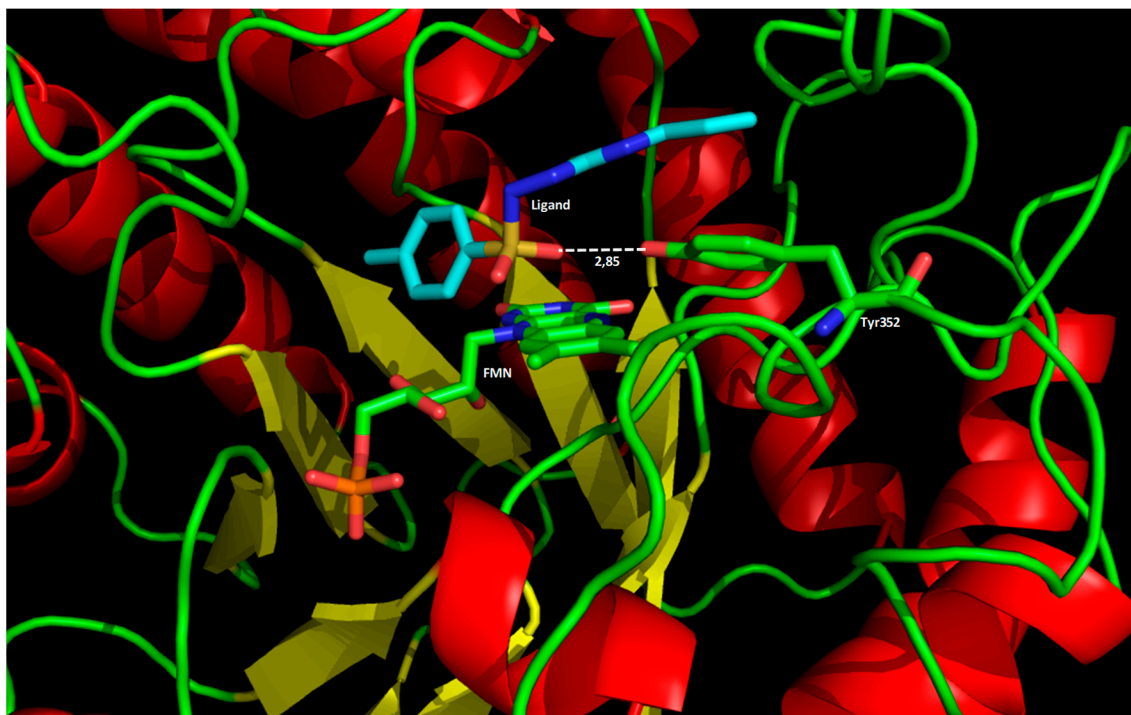

**Figure S8.37** – Representative figure of the [Ag(HL1<sup>Ch</sup>)<sub>2</sub>]<sup>+</sup>NO<sub>3</sub><sup>-</sup> complex at the site of the OLD Yellow enzyme from *Leishmania braziliensis*.

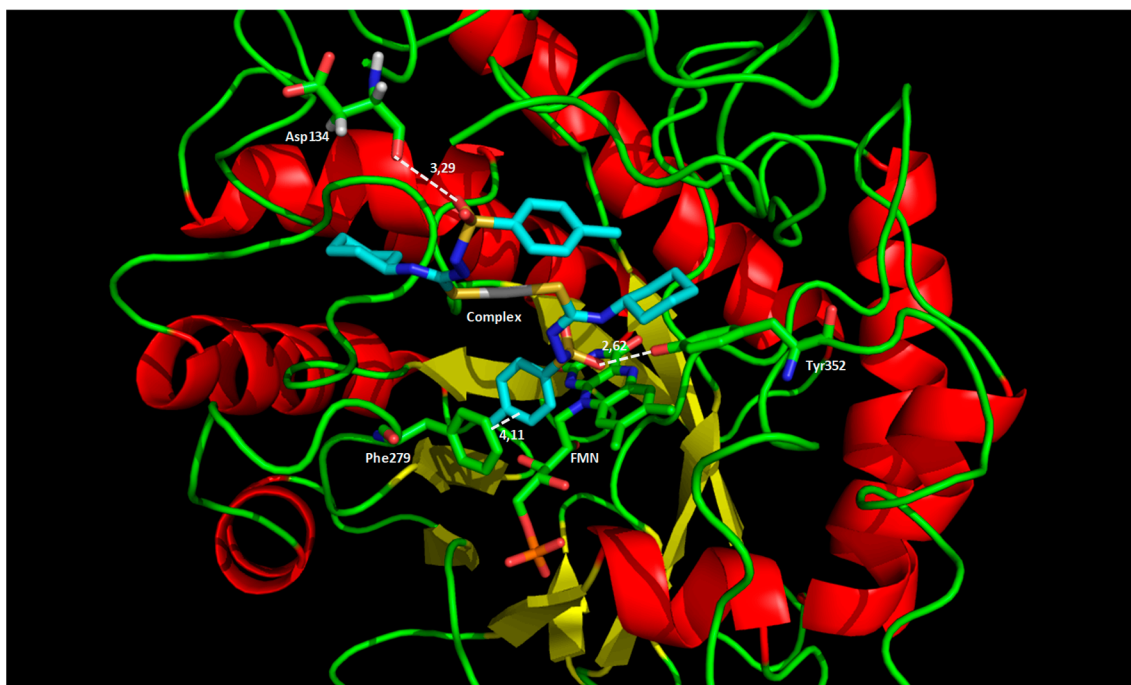



**Figure S8.38** – Representative figure of the  $[\text{Ag}(\text{HL2}^{\text{Ph}})_2]\text{NO}_3$  complex at the site of the OLD Yellow enzyme from *Leishmania braziliensis*.

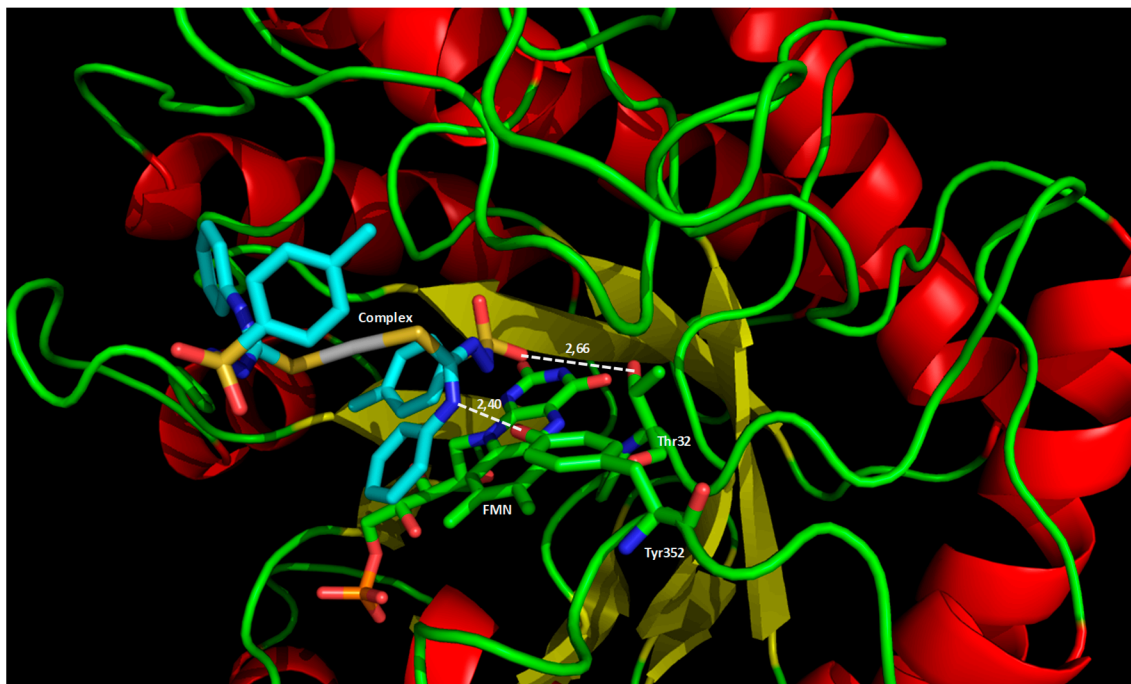

**Figure S8.39** – Representative figure of the  $[\text{Ag}(\text{HL3}^{\text{FPh}})_2]\text{NO}_3$  complex at the site of the OLD Yellow enzyme from *Leishmania braziliensis*.

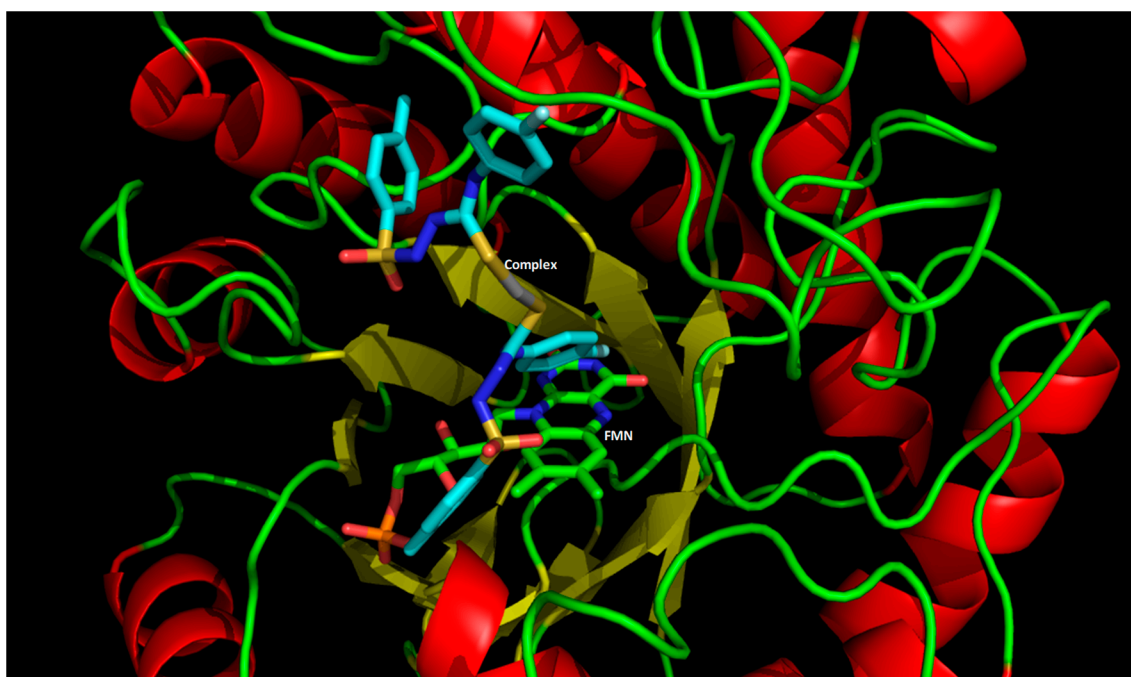

**Figure S8.40** – Representative figure of the  $[\text{Ag}(\text{HL4}^{\text{CIPh}})_2]\text{NO}_3$  complex at the site of the OLD Yellow enzyme from *Leishmania braziliensis*.

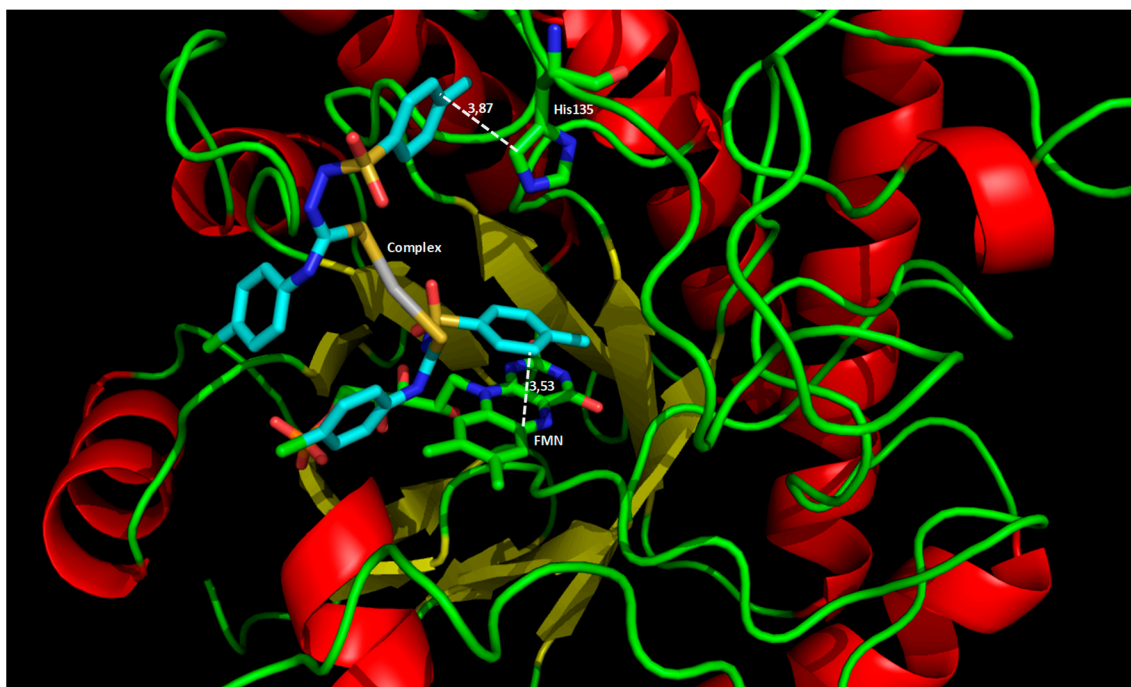

**Figure S8.41** – Representative figure of the  $[\text{Ag}(\text{HL5}^{\text{NO}_2\text{Ph}})_2]\text{NO}_3$  complex at the site of the OLD Yellow enzyme from *Leishmania braziliensis*.

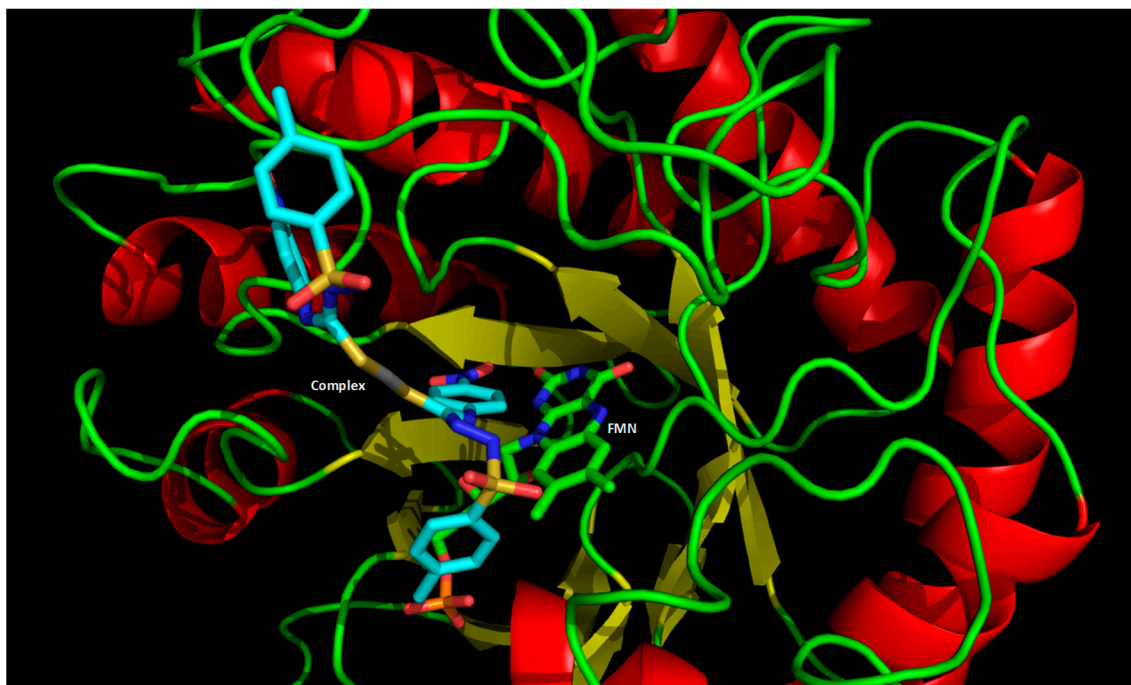

**Figure S8.42** – Representative figure of the  $[\text{Au}(\text{HL1}^{\text{Ch}})_2]\text{Cl}$  complex at the site of the OLD Yellow enzyme from *Leishmania braziliensis*.

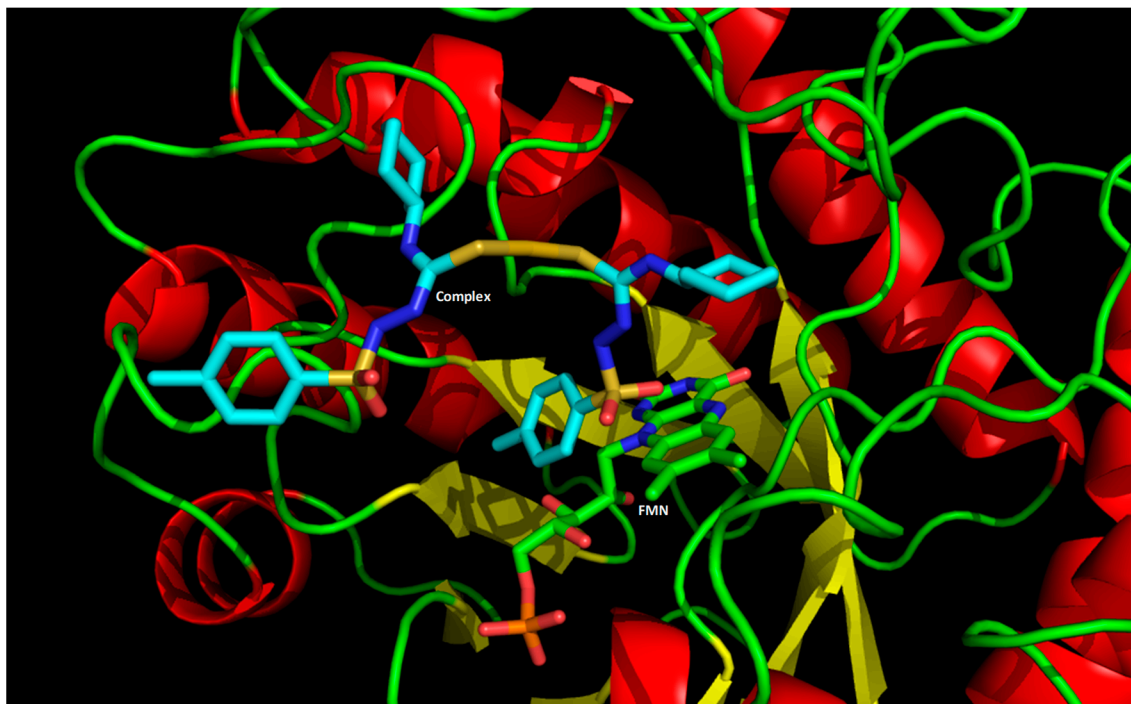

**Figure S8.43** – Representative figure of the  $[\text{Au}(\text{HL2}^{\text{Ph}})_2]\text{Cl}$  complex at the site of the OLD Yellow enzyme from *Leishmania braziliensis*.

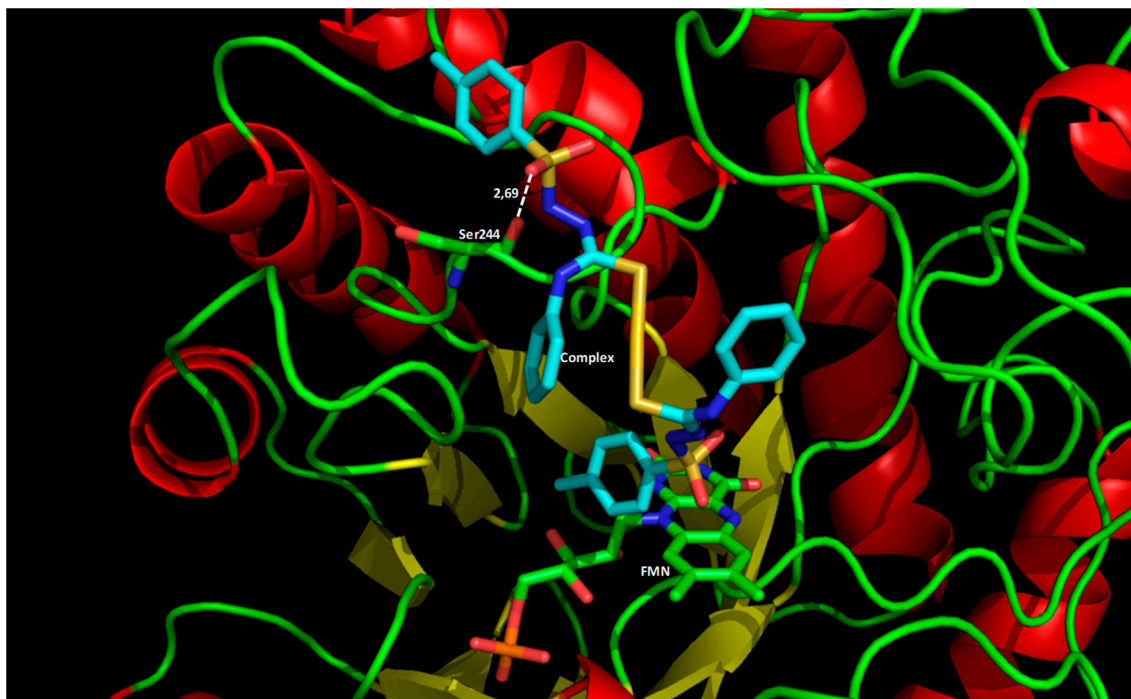



**Figure S8.44** – Representative figure of the  $[\text{Au}(\text{HL3}^{\text{FPh}})_2]\text{Cl}$  complex at the site of the OLD Yellow enzyme from *Leishmania braziliensis*.

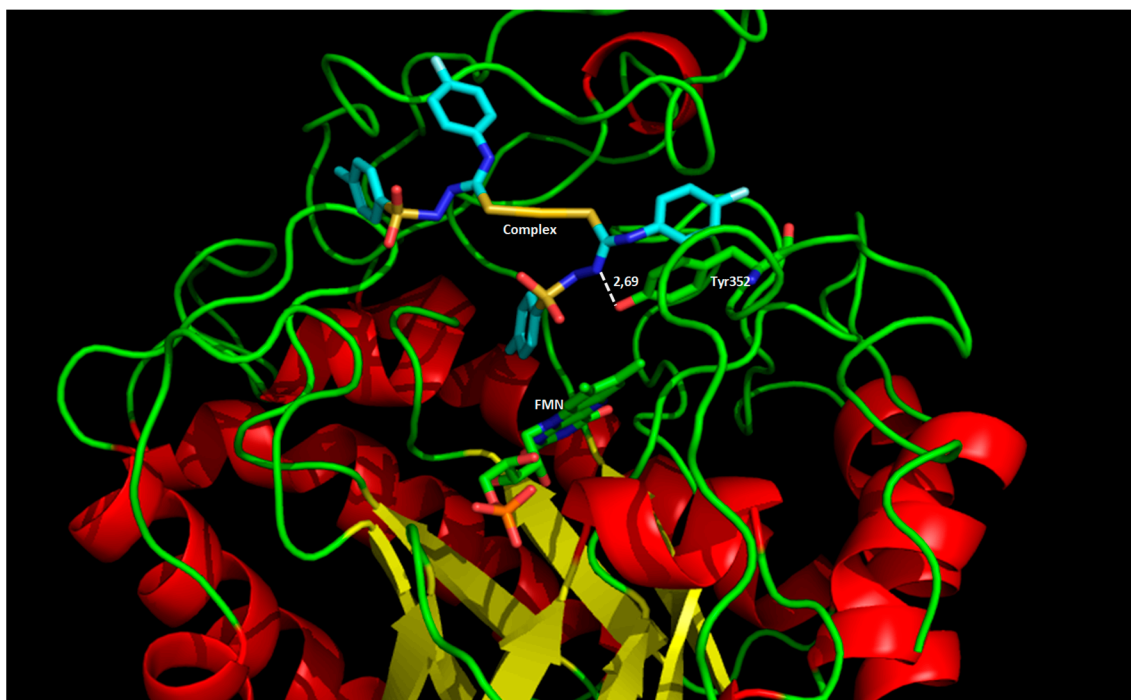

**Figure S8.45** – Representative figure of the  $[\text{Au}(\text{HL4}^{\text{ClPh}})_2]\text{Cl}$  complex at the site of the OLD Yellow enzyme from *Leishmania braziliensis*.

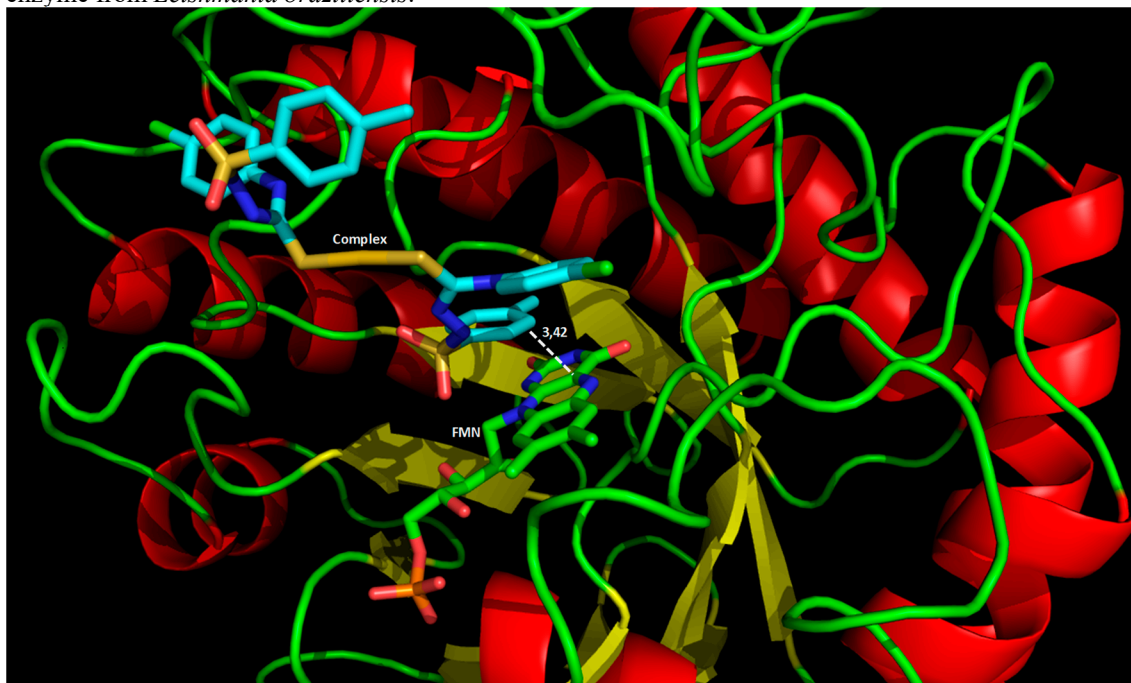

**Figure S8.46** – Representative figure of the  $[\text{Au}(\text{HL5}^{\text{NO}_2\text{Ph}})_2]\text{Cl}$  complex at the site of the OLD Yellow enzyme from *Leishmania braziliensis*.

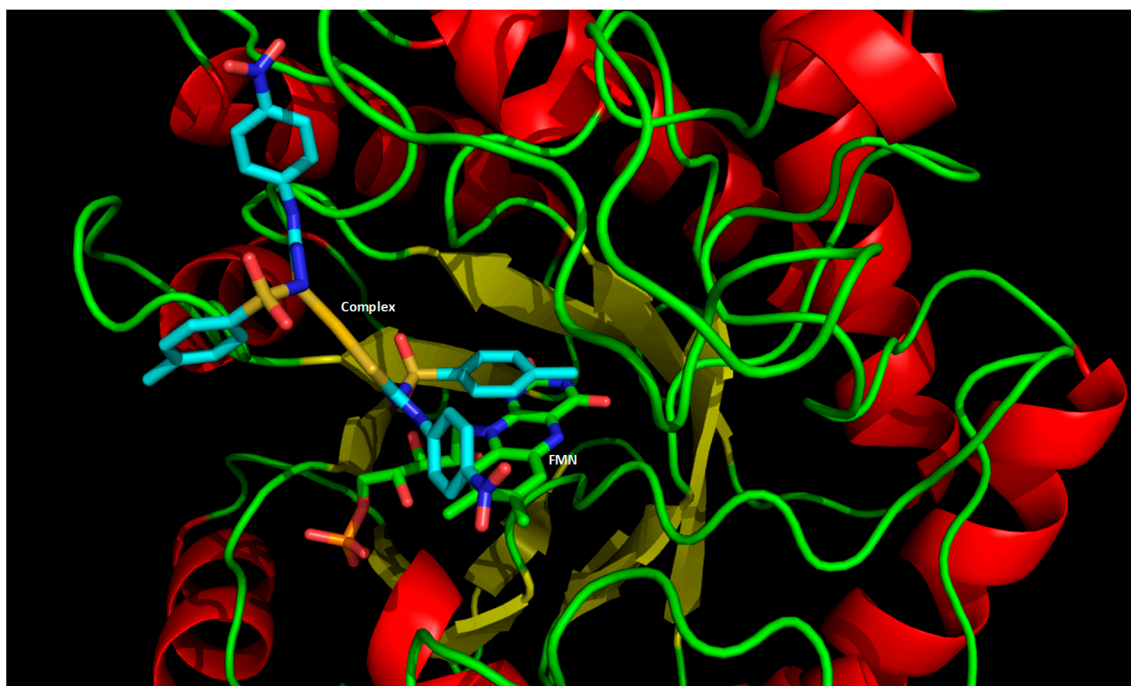

Supplement: s1 [file s1]
